# Supplementary material for: Design and synthesis of new 4-(2-nitrophenoxy)benzamide derivatives as potential antiviral agents: molecular modeling and in vitro antiviral screening
Source: Royal Society of Chemistry journal article supplement (doi:10.1039/d1nj02710g), 2021-01-01
Supplement: d1nj02710g1.pdf [file d1nj02710g1.pdf]

## Design and Synthesis of New 4-(2-Nitrophenoxy) Benzamide Derivatives as Potential Antiviral Agents: Molecular Modeling and *In Vitro* Antiviral Screening

Abdallah E. Abdallah<sup>a\*</sup>, Mohamed S. Alesawy<sup>a</sup>, Sally I. Eissa<sup>b,c</sup>, Esmail M. El-Fakharany<sup>d</sup>, Mohamed H. Kalaba<sup>e</sup>, Mohamed H. Sharaf<sup>e</sup>, Noura M. Abo Shama<sup>f</sup>, Sara H. Mahmoud<sup>f</sup>, Ahmed Mostafa<sup>f</sup>, Ahmed A. Al-Karmalawy<sup>g</sup>, Hazem Elkady<sup>a\*</sup>

<sup>a</sup> Pharmaceutical Medicinal Chemistry & Drug Design Department, Faculty of Pharmacy (Boys), Al-Azhar University, Cairo 11884, Egypt.

<sup>b</sup> Department of Pharmaceutical Chemistry, Faculty of Pharmacy (Girls), Al-Azhar University, Cairo 11884, Egypt.

<sup>c</sup> Faculty of Pharmacy Al-Maareffa University for Science and Technology, Riyadh, Kingdom of Saudi Arabia.

<sup>d</sup> Protein Research Department, Genetic Engineering and Biotechnology Research Institute, City of Scientific Research and Technological Applications, Egypt.

<sup>e</sup> Botany and Microbiology Department, Faculty of Science, Al-Azhar University.

<sup>f</sup> Center of Scientific Excellence for Influenza Viruses, National Research Centre, Giza 12622, Egypt.

<sup>g</sup> Department of Pharmaceutical Medicinal Chemistry, Faculty of Pharmacy, Horus University-Egypt, New Damietta 34518, Egypt.

\* **Corresponding authors:**

**Abdallah E. Abdallah:** Email: [Abdulla\\_emara@azhar.edu.eg](mailto:Abdulla_emara@azhar.edu.eg)

**Hazem Elkady:** Email: [Hazemelkady@azhar.edu.eg](mailto:Hazemelkady@azhar.edu.eg)

To be published in New Journal of Chemistry

Abdallah ElSayed\_H\_301.10.fid  
Abdallah ElSayed\_H\_301

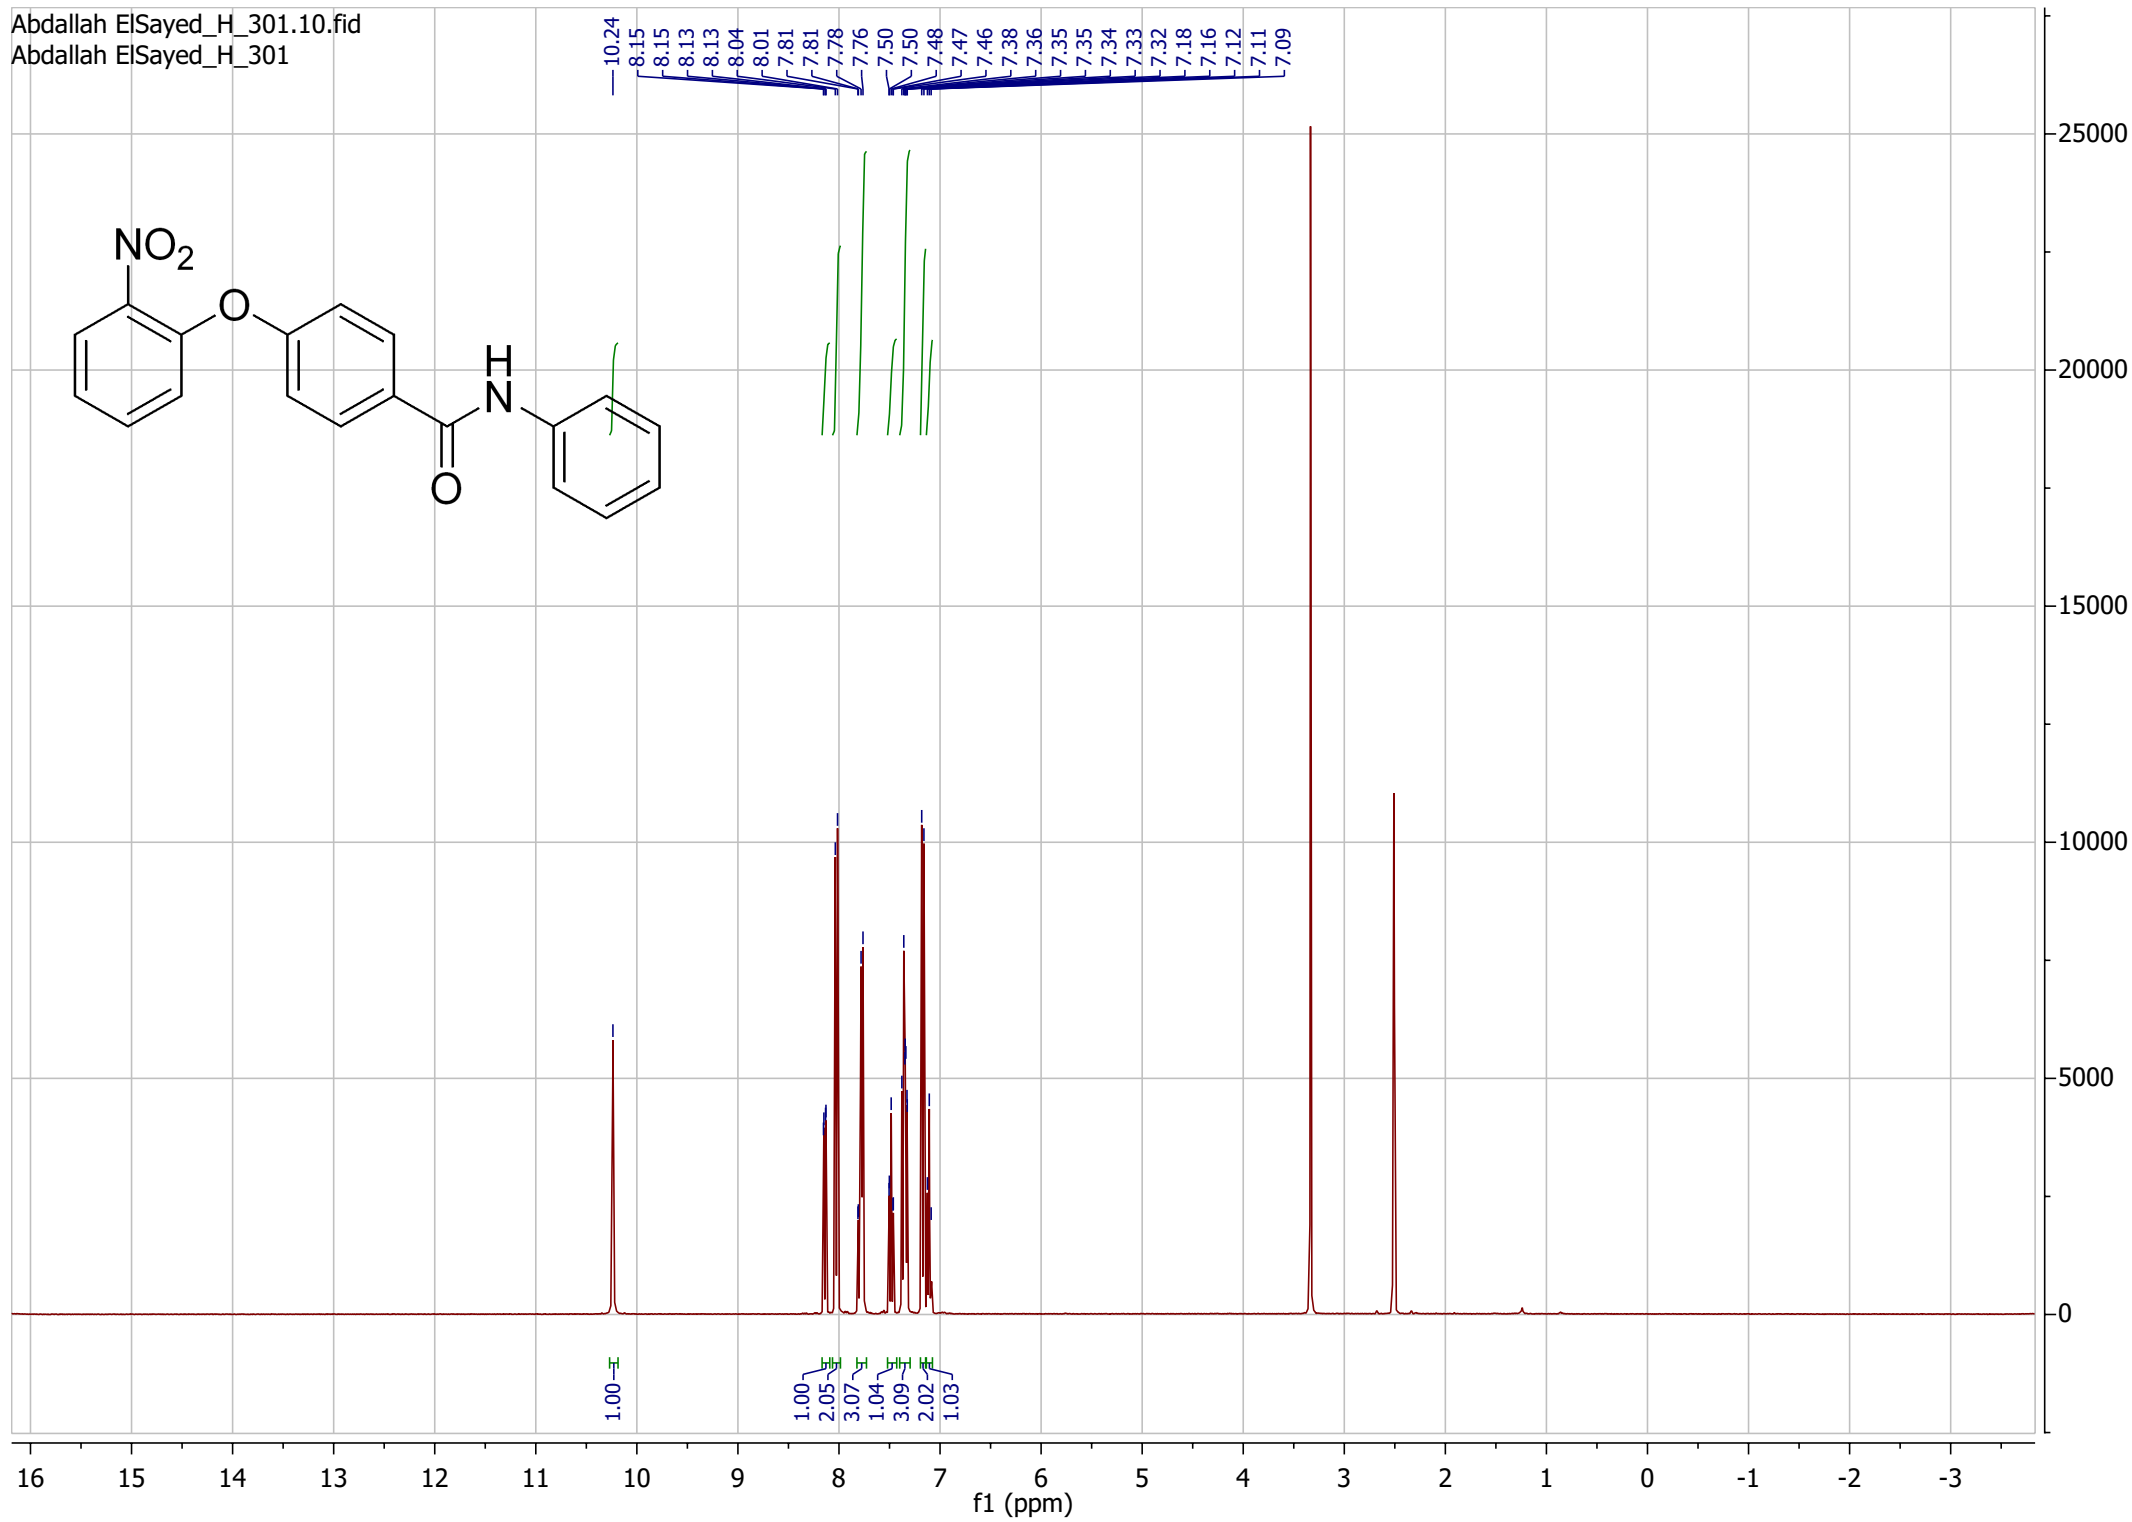

Abdallah ElSayed\_C\_301.10.fid  
Abdallah ElSayed\_C\_301

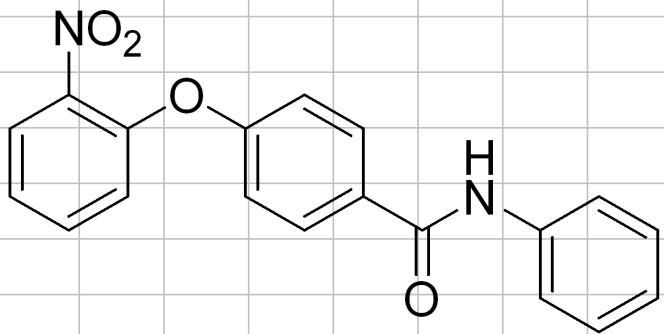

165.14  
159.26  
148.44  
142.12  
139.58  
135.86  
130.95  
130.54  
129.08  
126.34  
125.90  
124.15  
122.91  
120.86  
117.78

40.56 DMSO  
40.35 DMSO  
40.14 DMSO  
39.93 DMSO  
39.72 DMSO  
39.51 DMSO  
39.31 DMSO

210 200 190 180 170 160 150 140 130 120 110 100 90 80 70 60 50 40 30 20 10 0 -10

f1 (ppm)

23000  
22000  
21000  
20000  
19000  
18000  
17000  
16000  
15000  
14000  
13000  
12000  
11000  
10000  
9000  
8000  
7000  
6000  
5000  
4000  
3000  
2000  
1000  
0  
-1000  
-2000

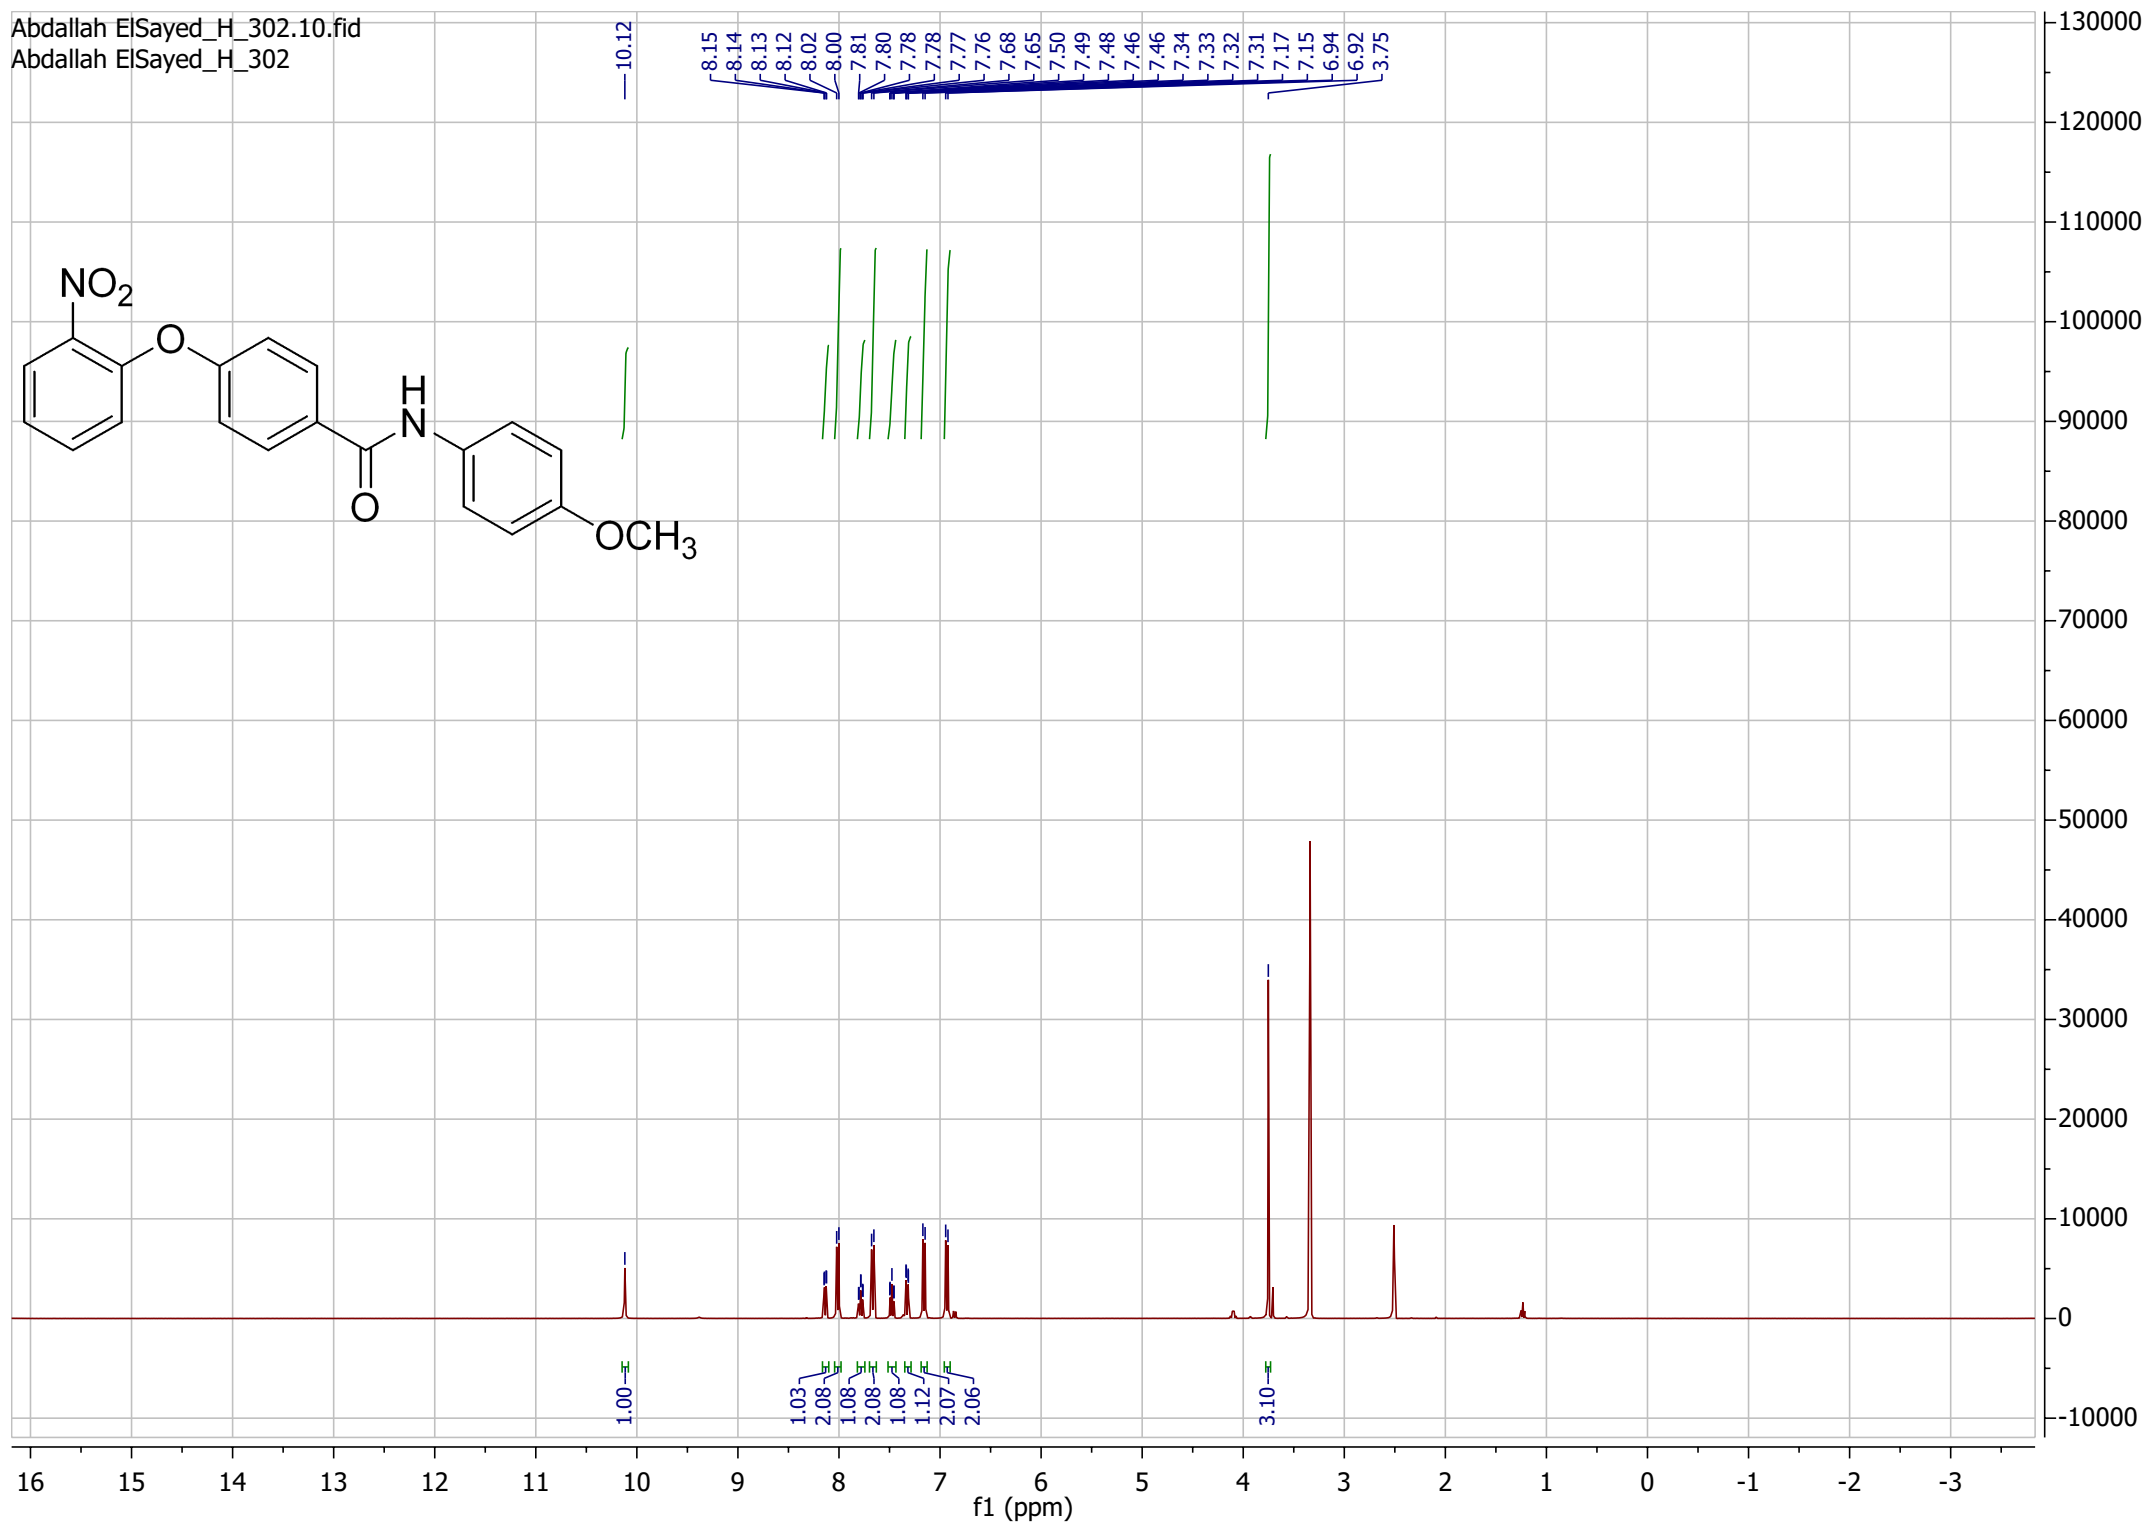

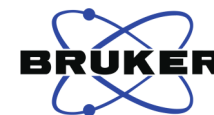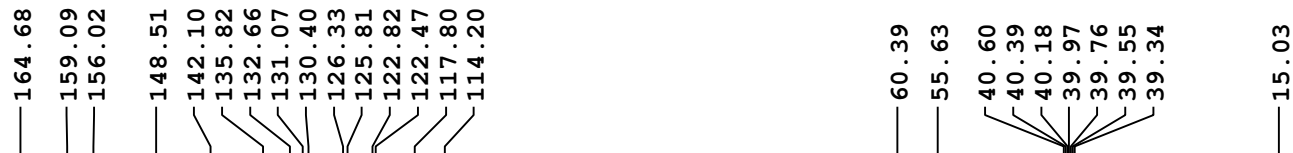

Current Data Parameters  
 NAME Abdallah ElSayed\_C\_302  
 EXPNO 10  
 PROCNO 1

F2 - Acquisition Parameters  
 Date\_ 20201125  
 Time 18.11  
 INSTRUM spect  
 PROBHD 5 mm PABBO BB/  
 PULPROG zgpg30  
 TD 65536  
 SOLVENT DMSO  
 NS 1500  
 DS 4  
 SWH 24038.461 Hz  
 FIDRES 0.366798 Hz  
 AQ 1.3631488 sec  
 RG 202.37  
 DW 20.800 usec  
 DE 6.50 usec  
 TE 298.1 K  
 D1 2.00000000 sec  
 D11 0.03000000 sec  
 TD0 1

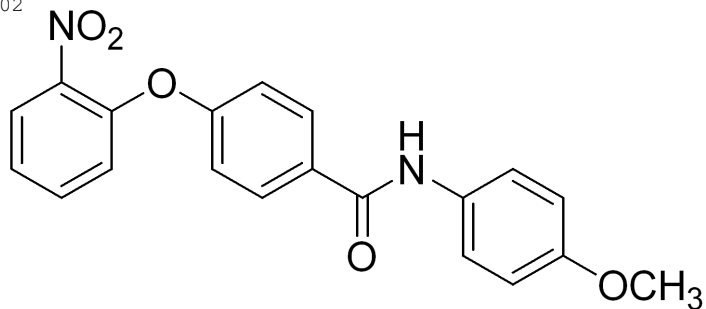

==== CHANNEL f1 =====  
 SFO1 100.6379178 MHz  
 NUC1 13C  
 P1 10.00 usec  
 PLW1 45.00000000 W

==== CHANNEL f2 =====  
 SFO2 400.1916008 MHz  
 NUC2 1H  
 CPDPRG[2] waltz16

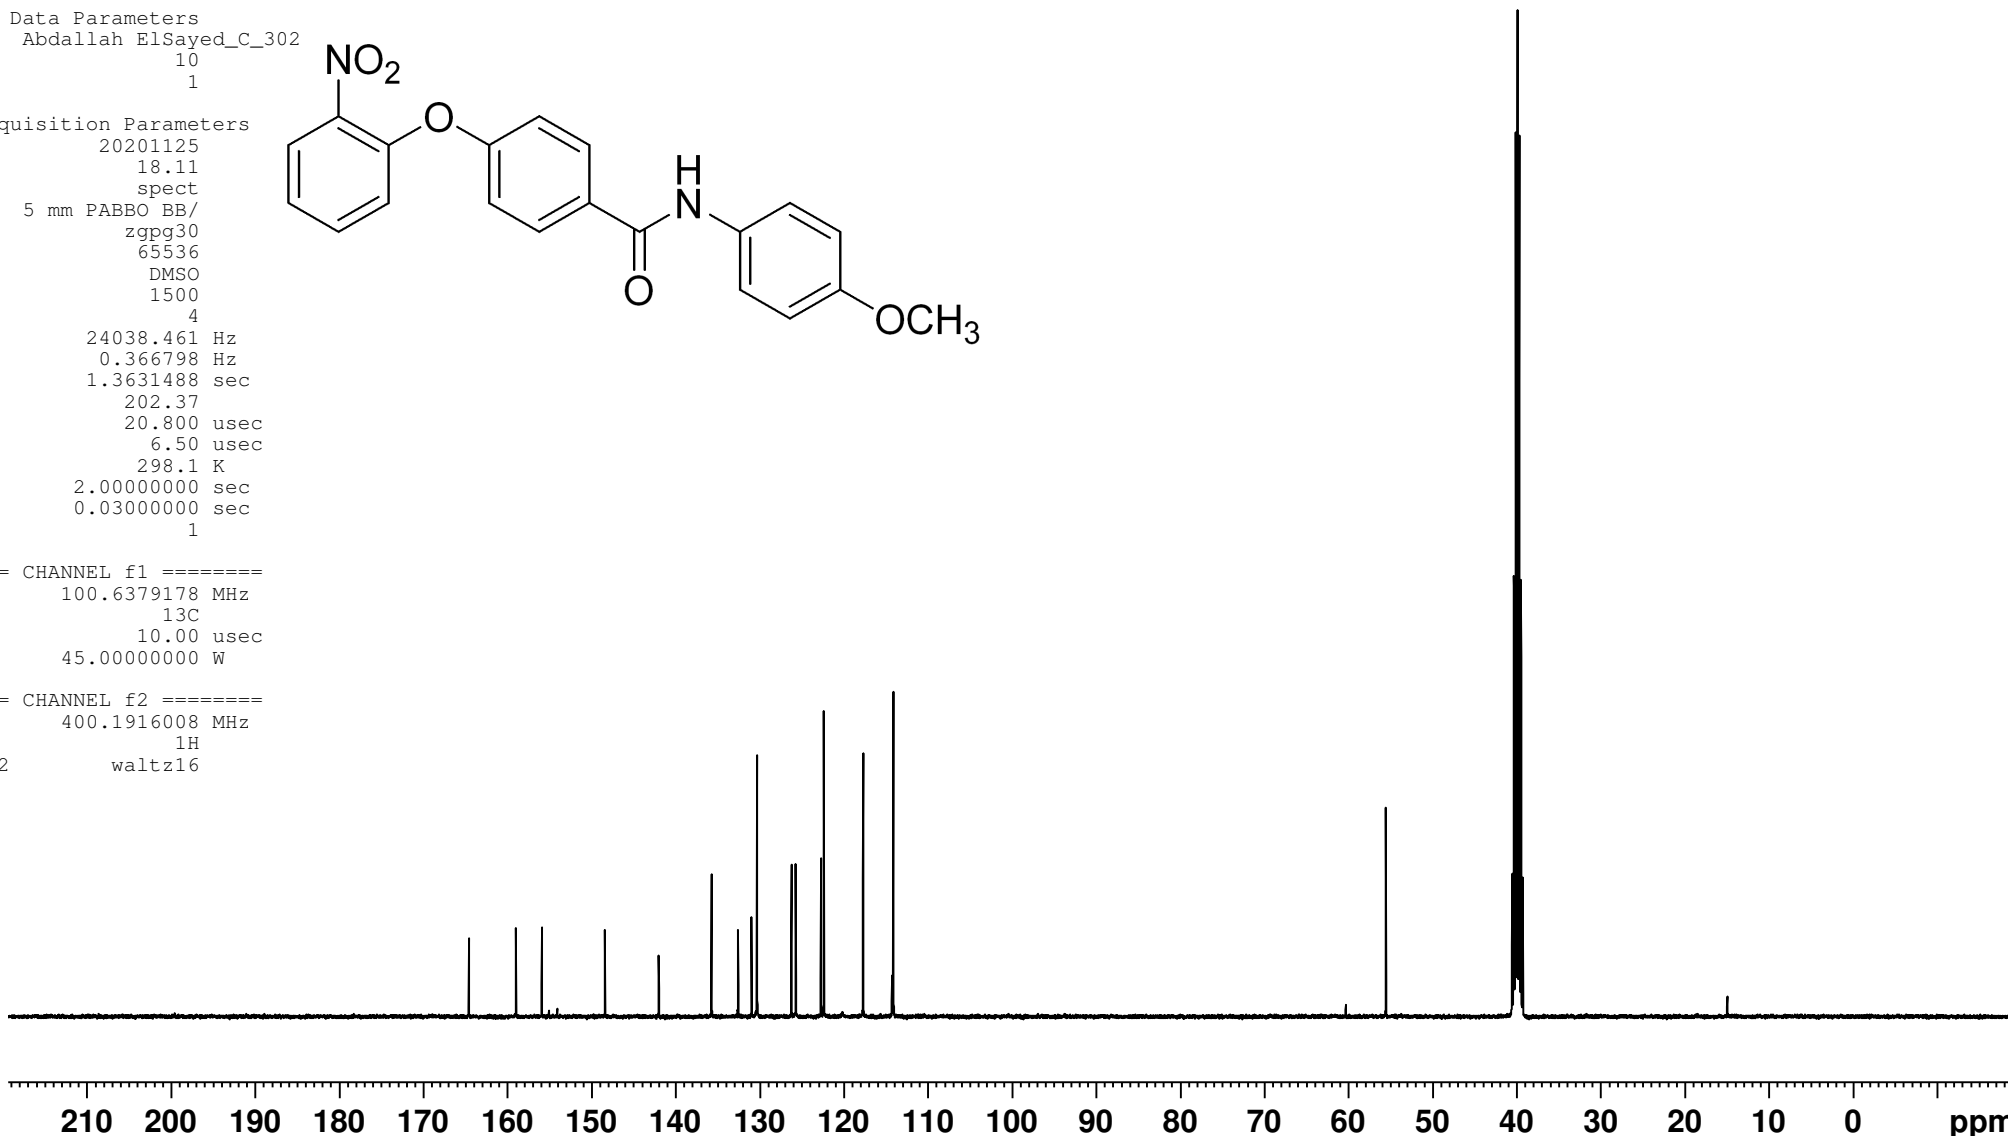

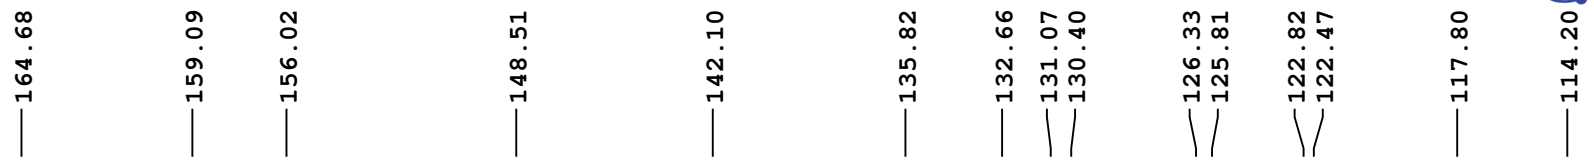

Current Data Parameters  
 NAME Abdallah ElSayed\_C\_302  
 EXPNO 10  
 PROCNO 1

F2 - Acquisition Parameters  
 Date\_ 20201125  
 Time 18.11  
 INSTRUM spect  
 PROBHD 5 mm PABBO BB/  
 PULPROG zgpg30  
 TD 65536  
 SOLVENT DMSO  
 NS 1500  
 DS 4  
 SWH 24038.461 Hz  
 FIDRES 0.366798 Hz  
 AQ 1.3631488 sec  
 RG 202.37  
 DW 20.800 usec  
 DE 6.50 usec  
 TE 298.1 K  
 D1 2.00000000 sec  
 D11 0.03000000 sec  
 TD0 1

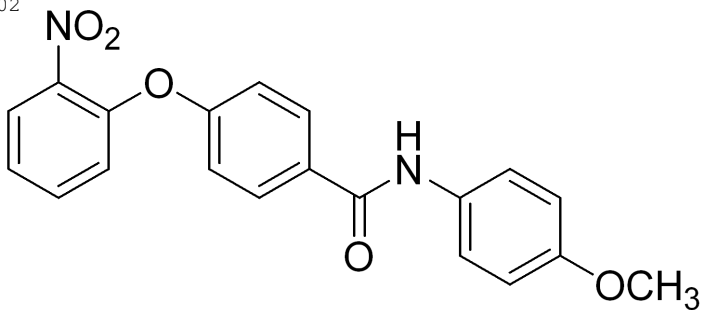

==== CHANNEL f1 =====  
 SFO1 100.6379178 MHz  
 NUC1 13C  
 P1 10.00 usec  
 PLW1 45.00000000 W

==== CHANNEL f2 =====  
 SFO2 400.1916008 MHz  
 NUC2 1H  
 CPDPRG[2] waltz16

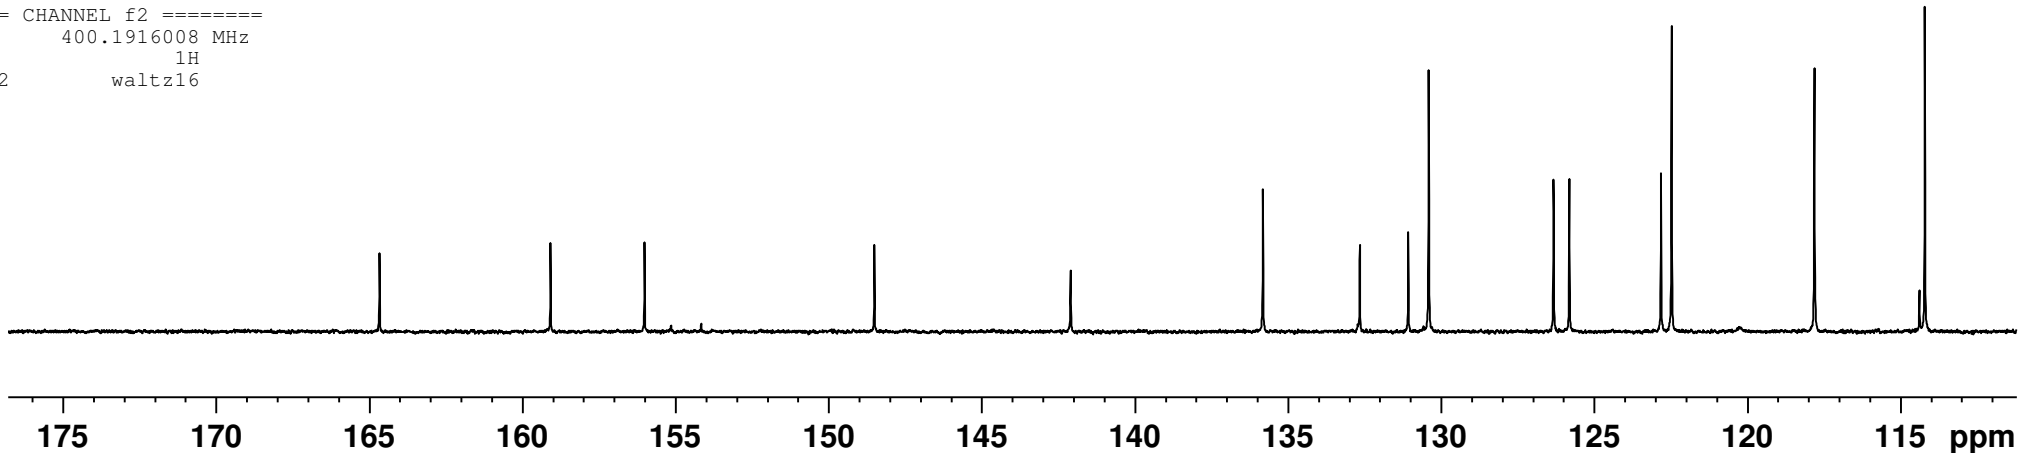

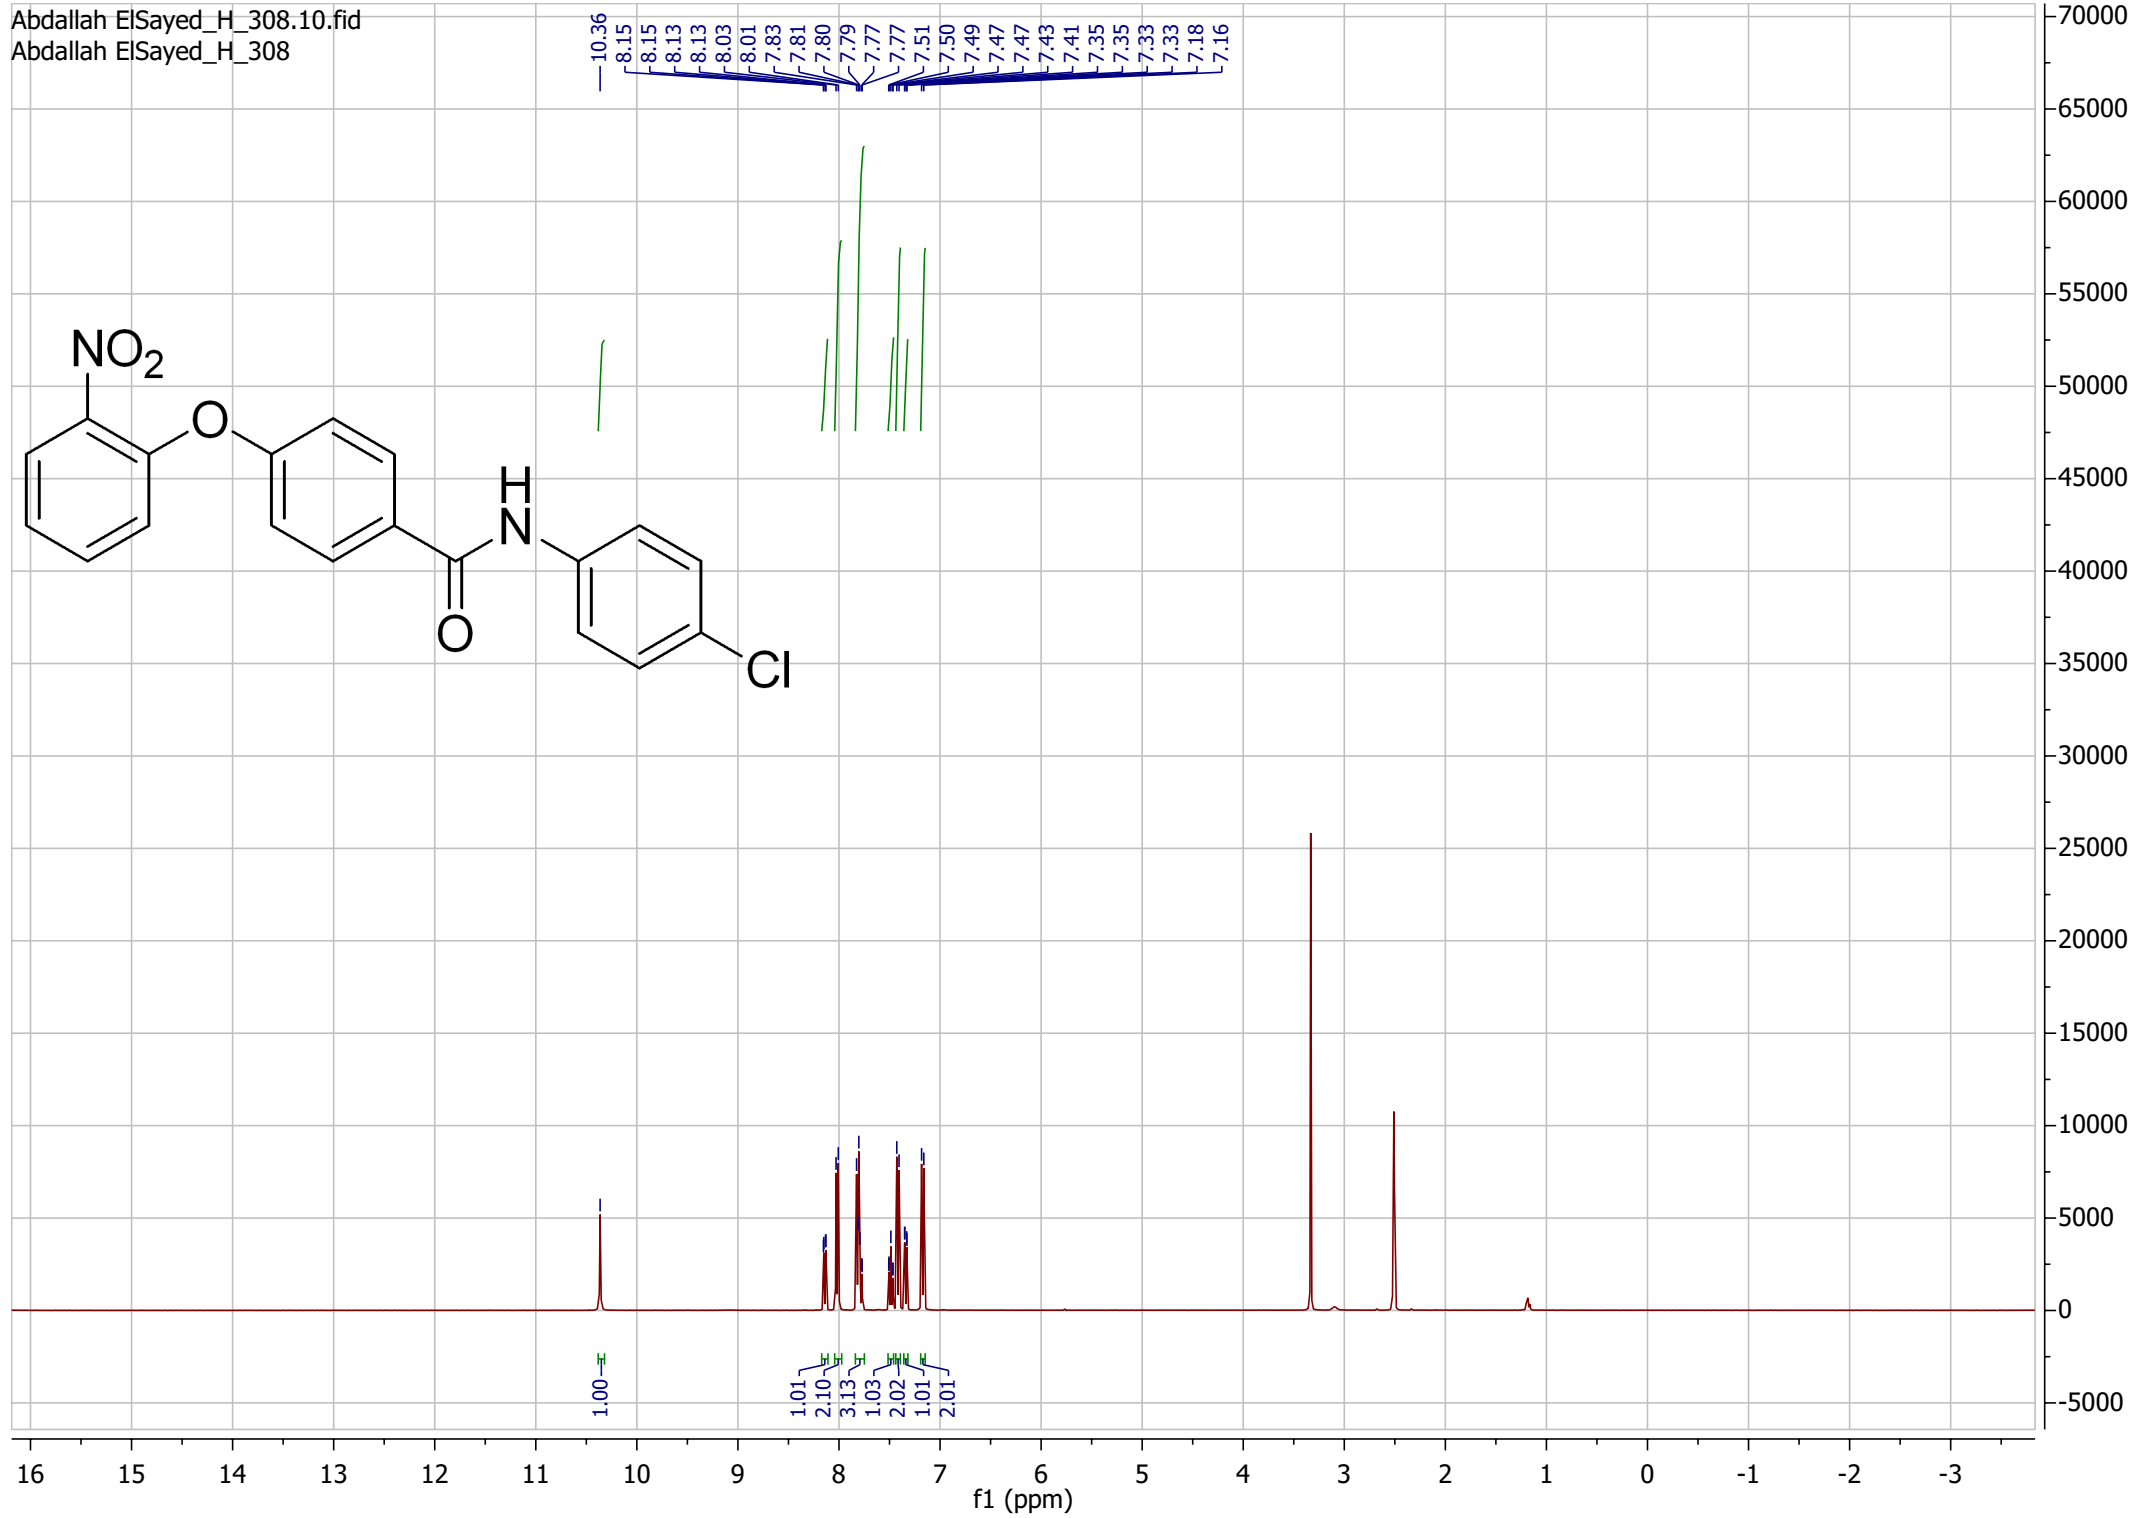

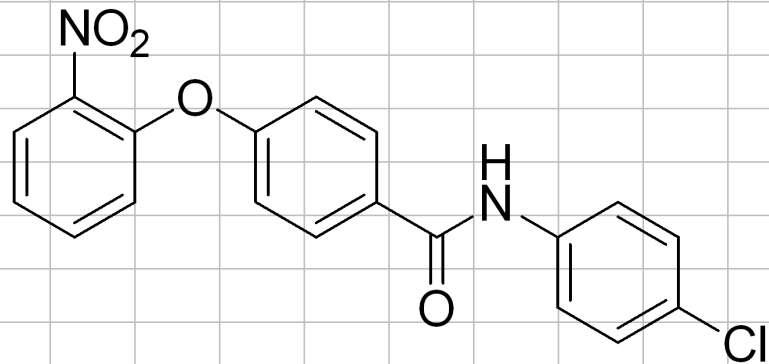

- 165.21
- 159.40
- 148.39
- 142.14
- 138.61
- 135.86
- 130.65
- 130.59
- 128.98
- 127.72
- 126.36
- 125.94
- 122.96
- 122.32
- 117.78

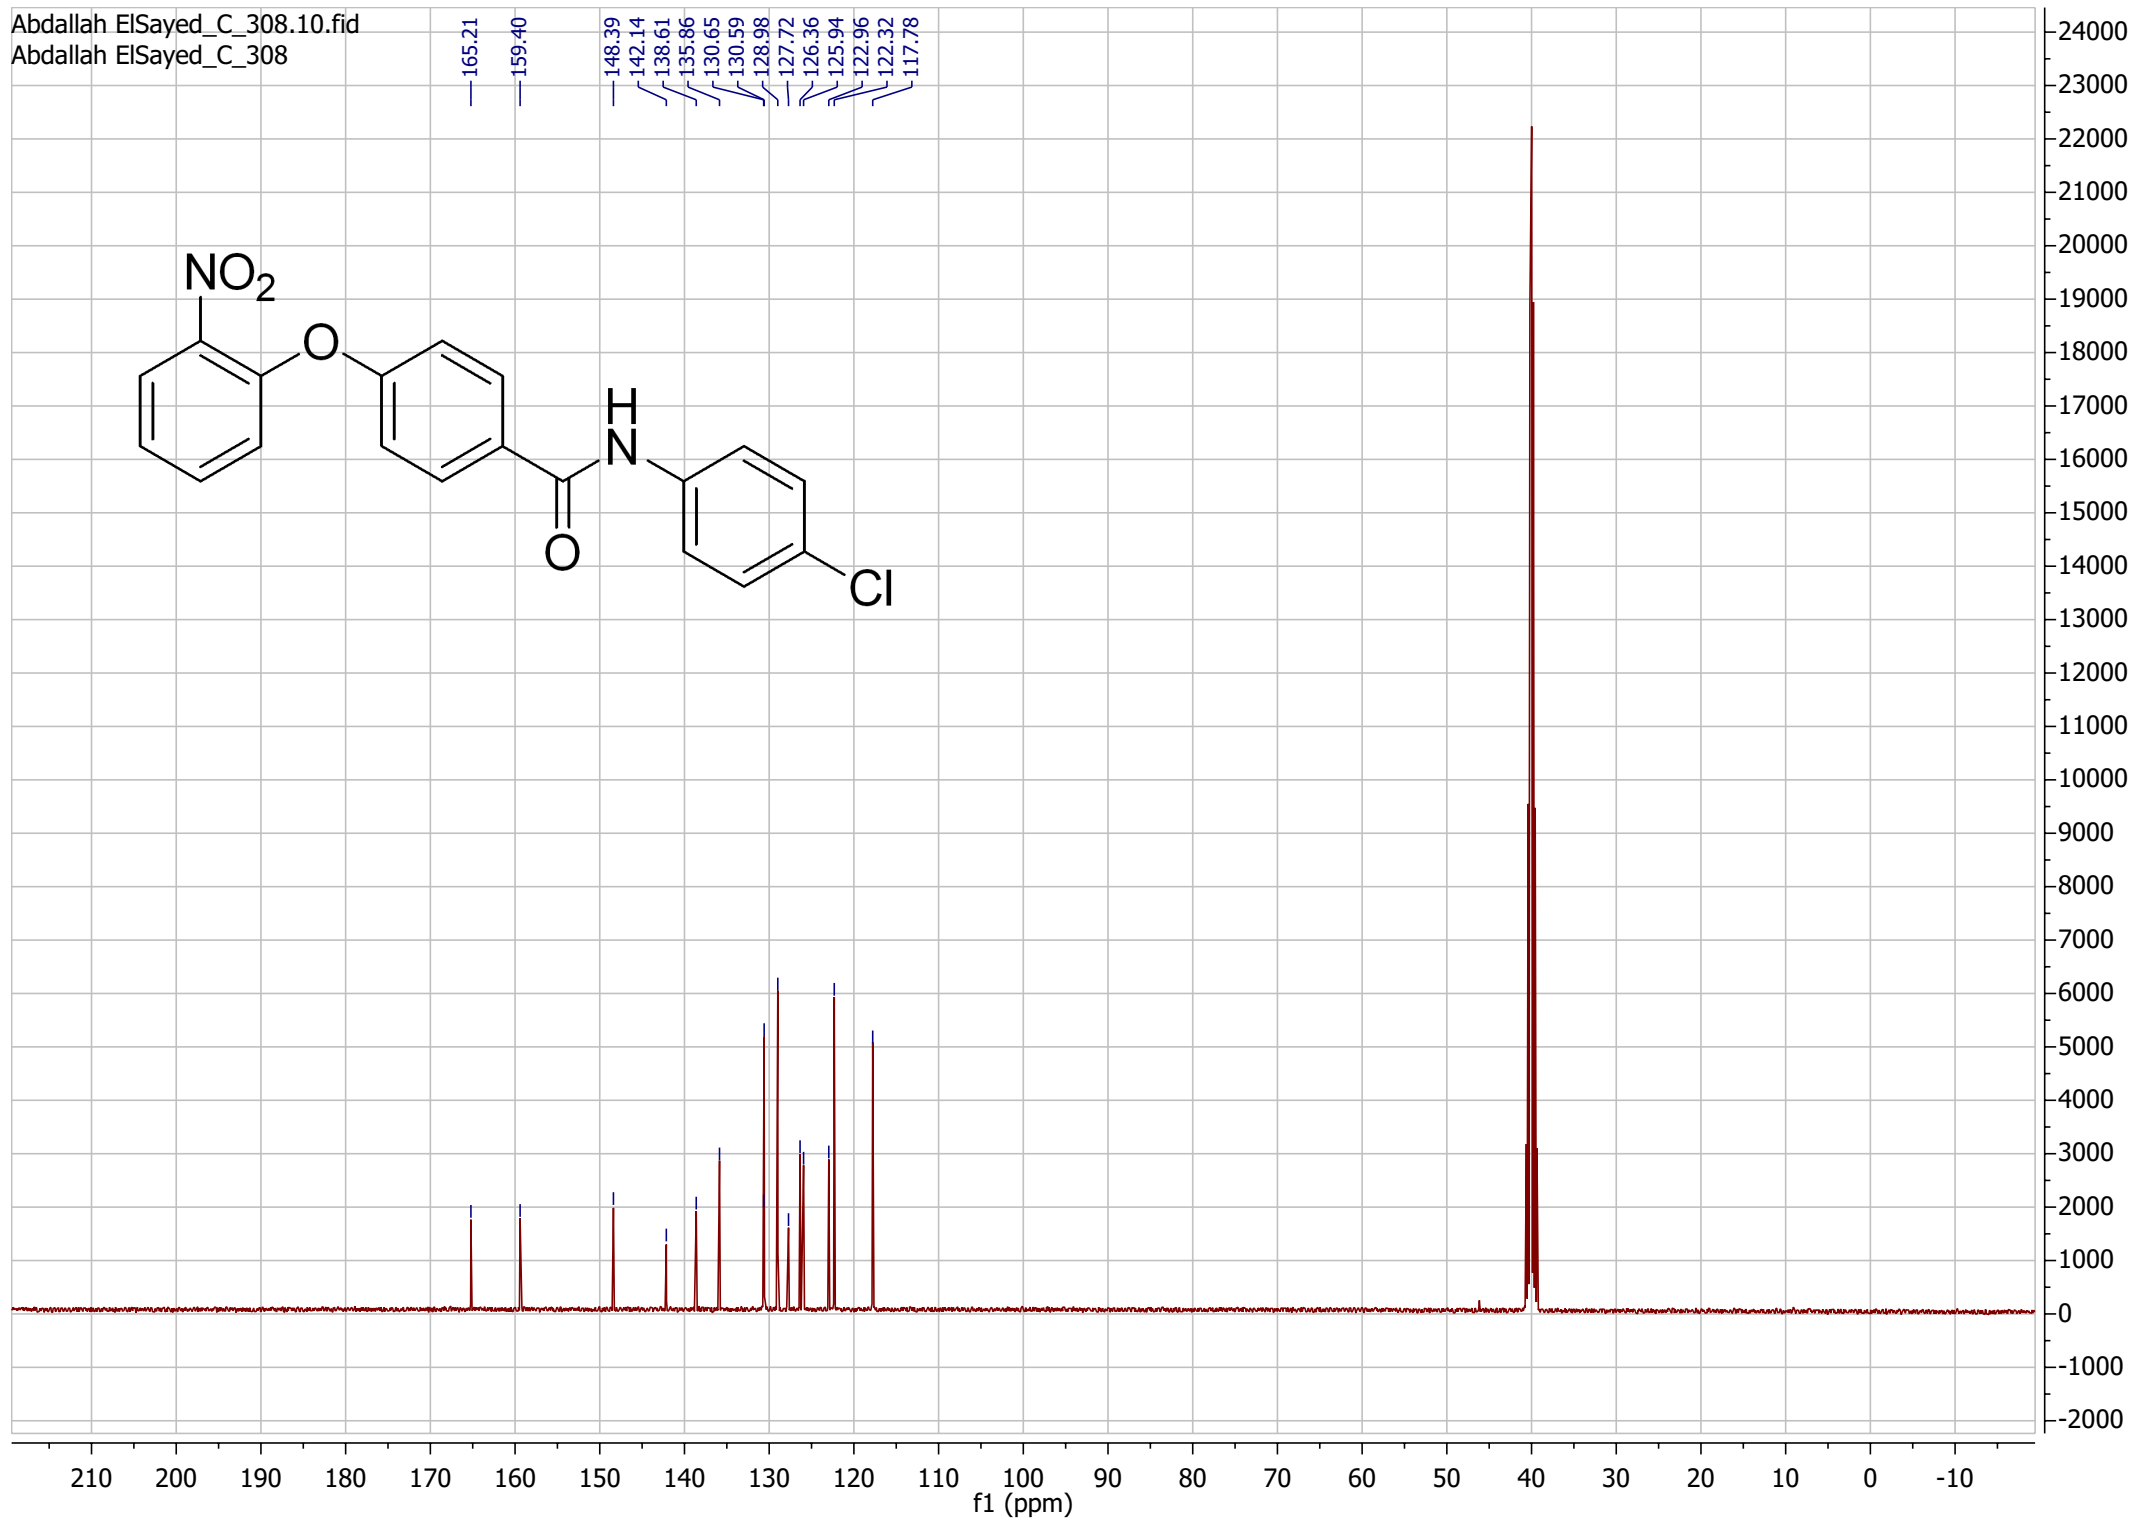



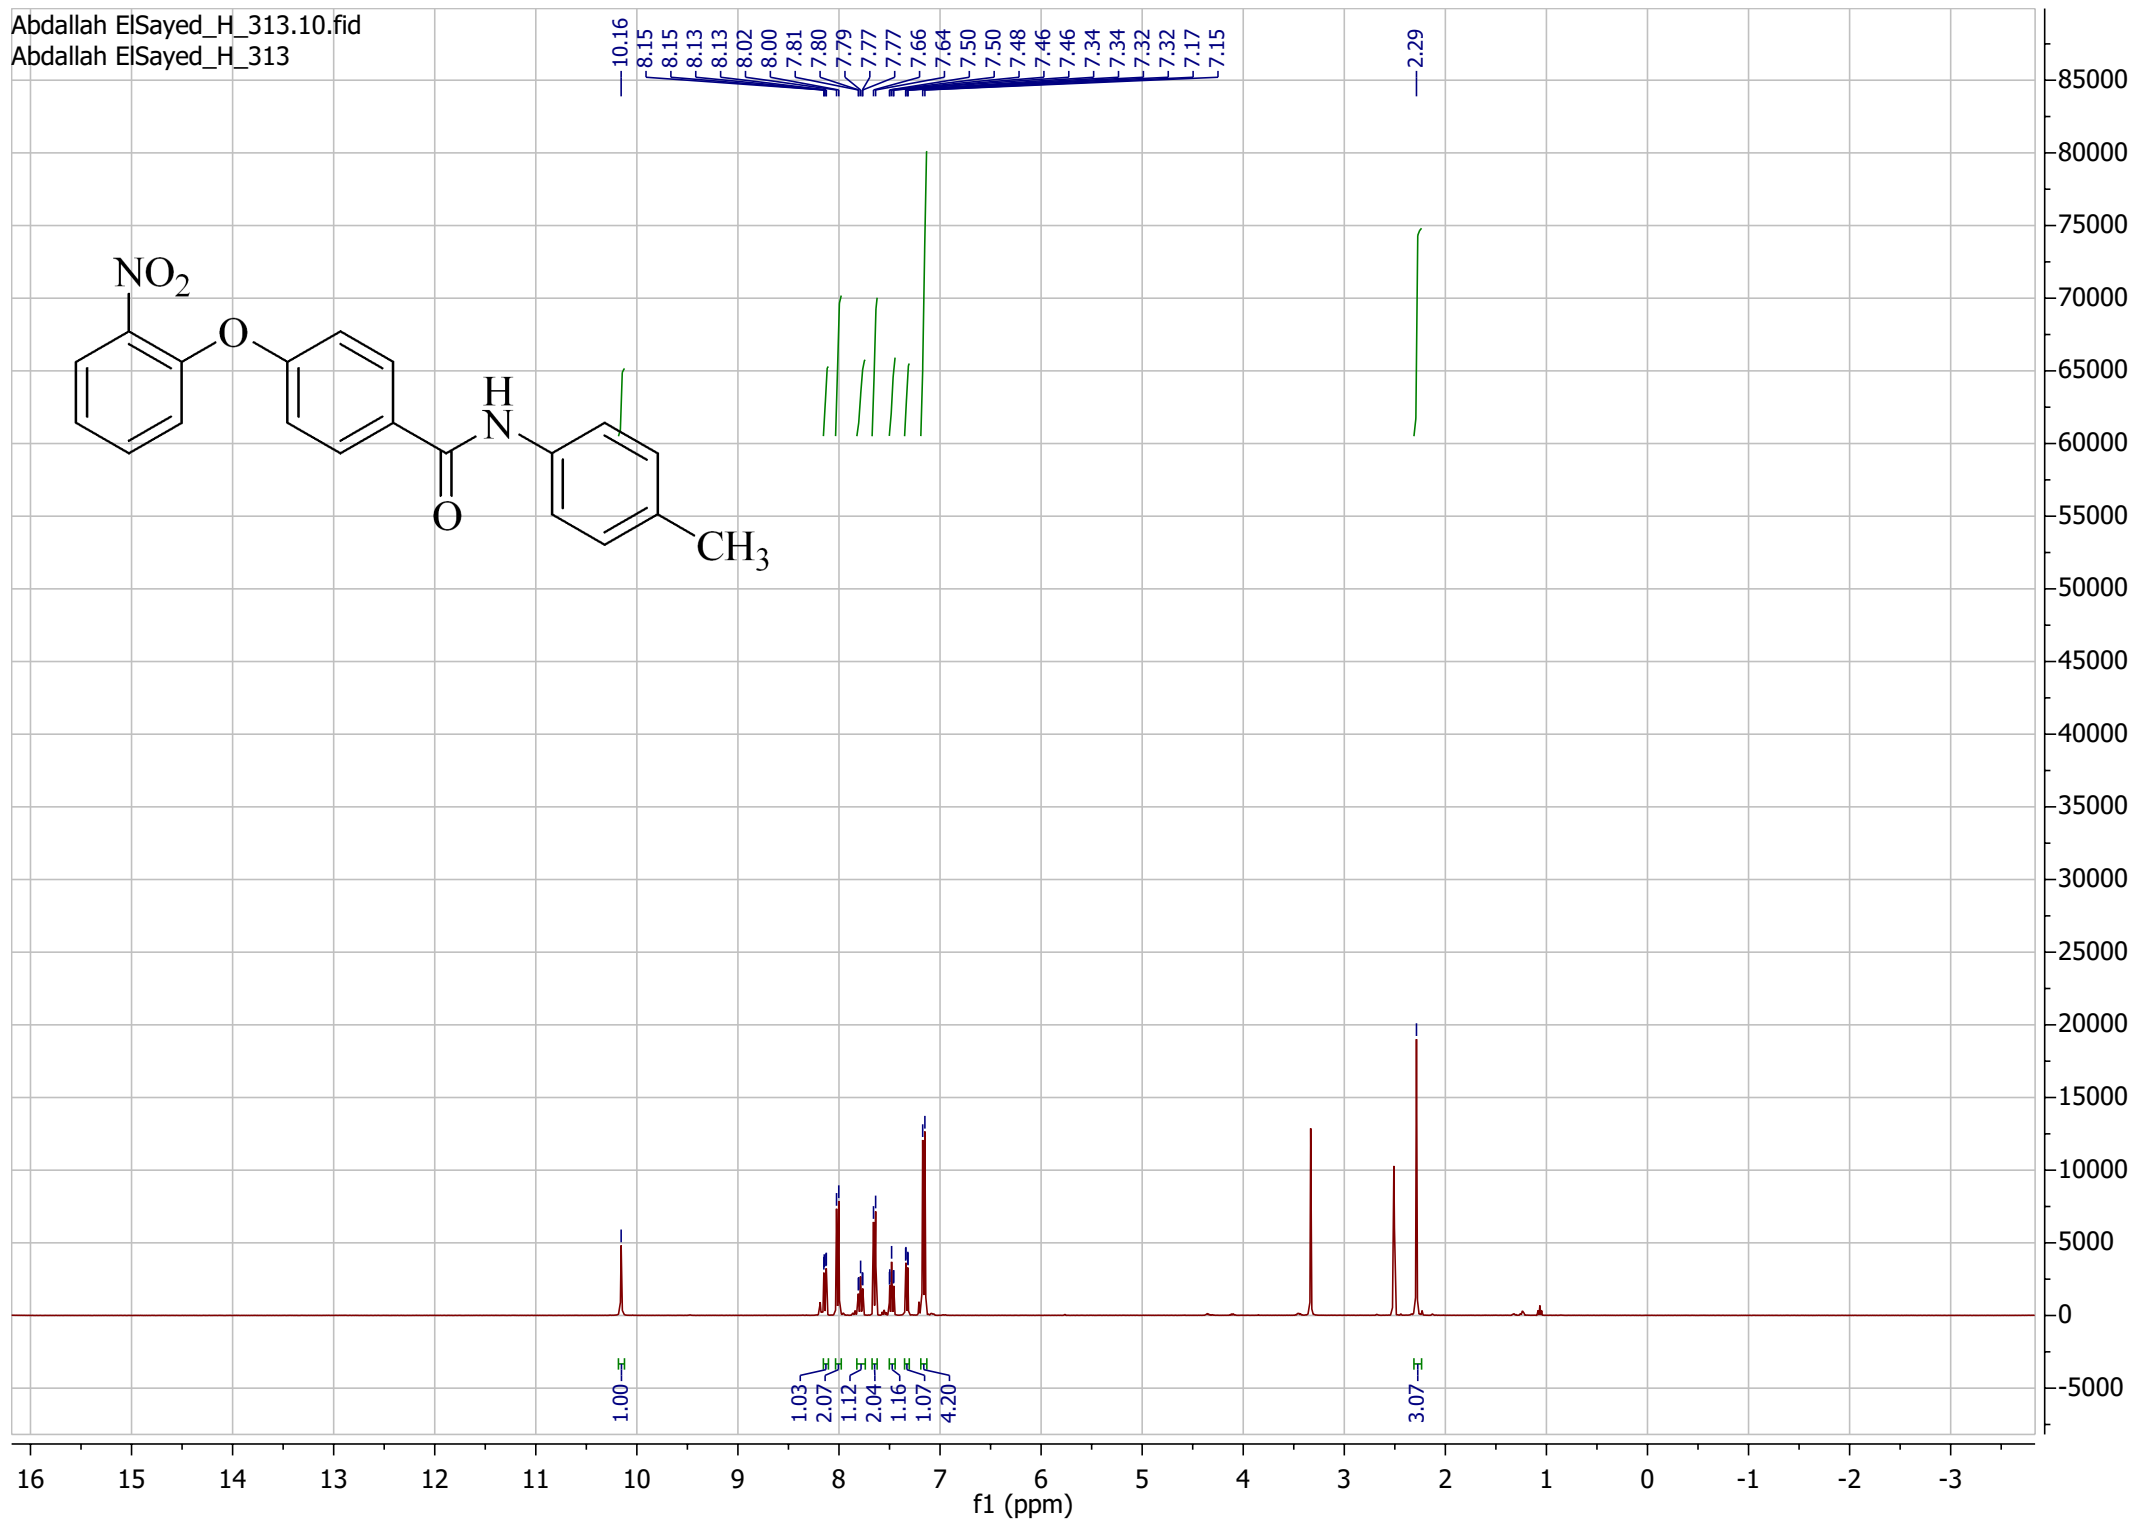

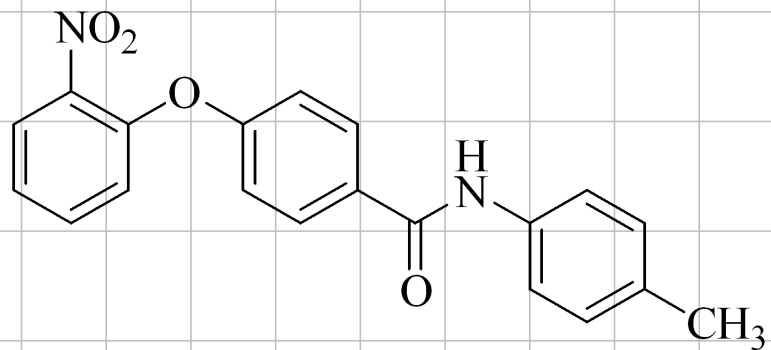

164.90  
159.16  
148.49  
142.11  
137.08  
135.83  
133.07  
131.06  
130.47  
129.45  
126.33  
125.84  
122.85  
120.88  
117.79

20.95

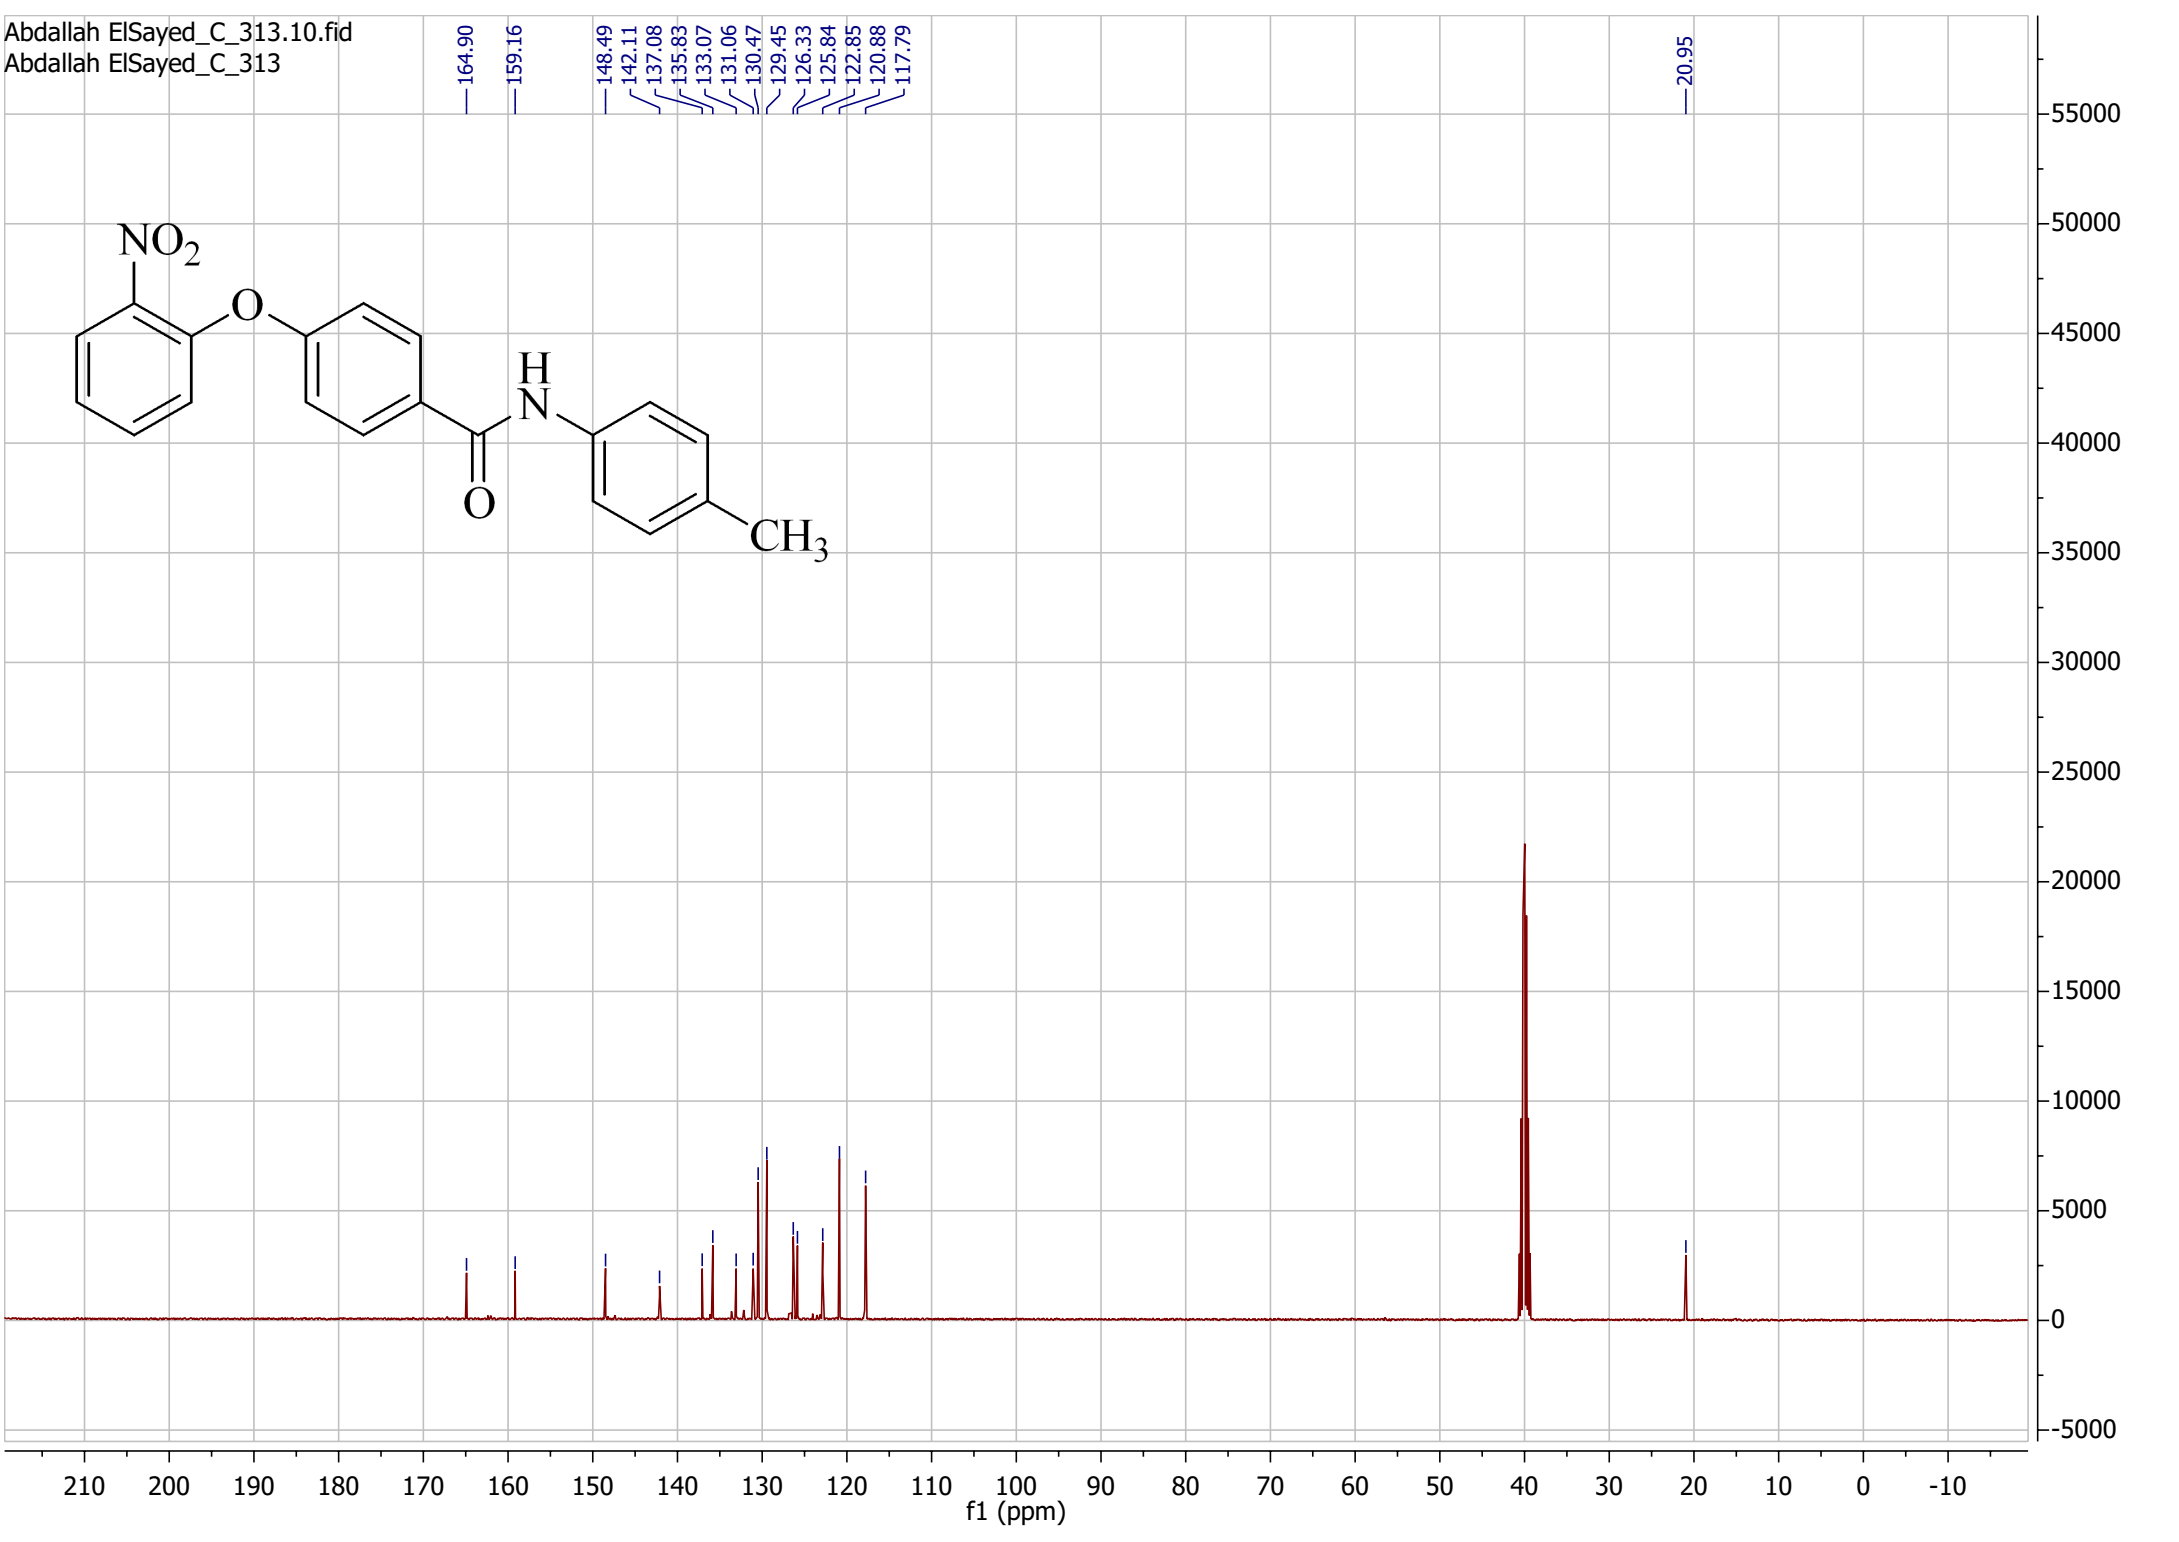

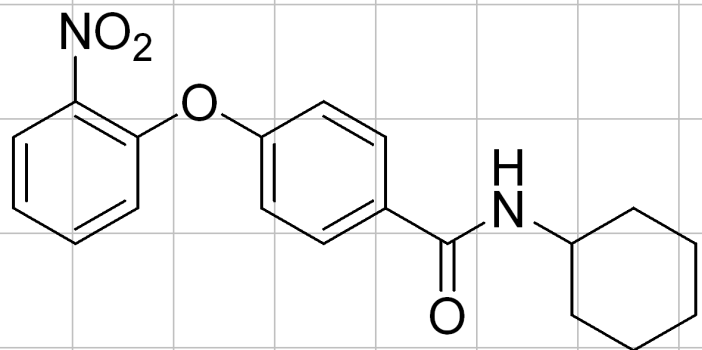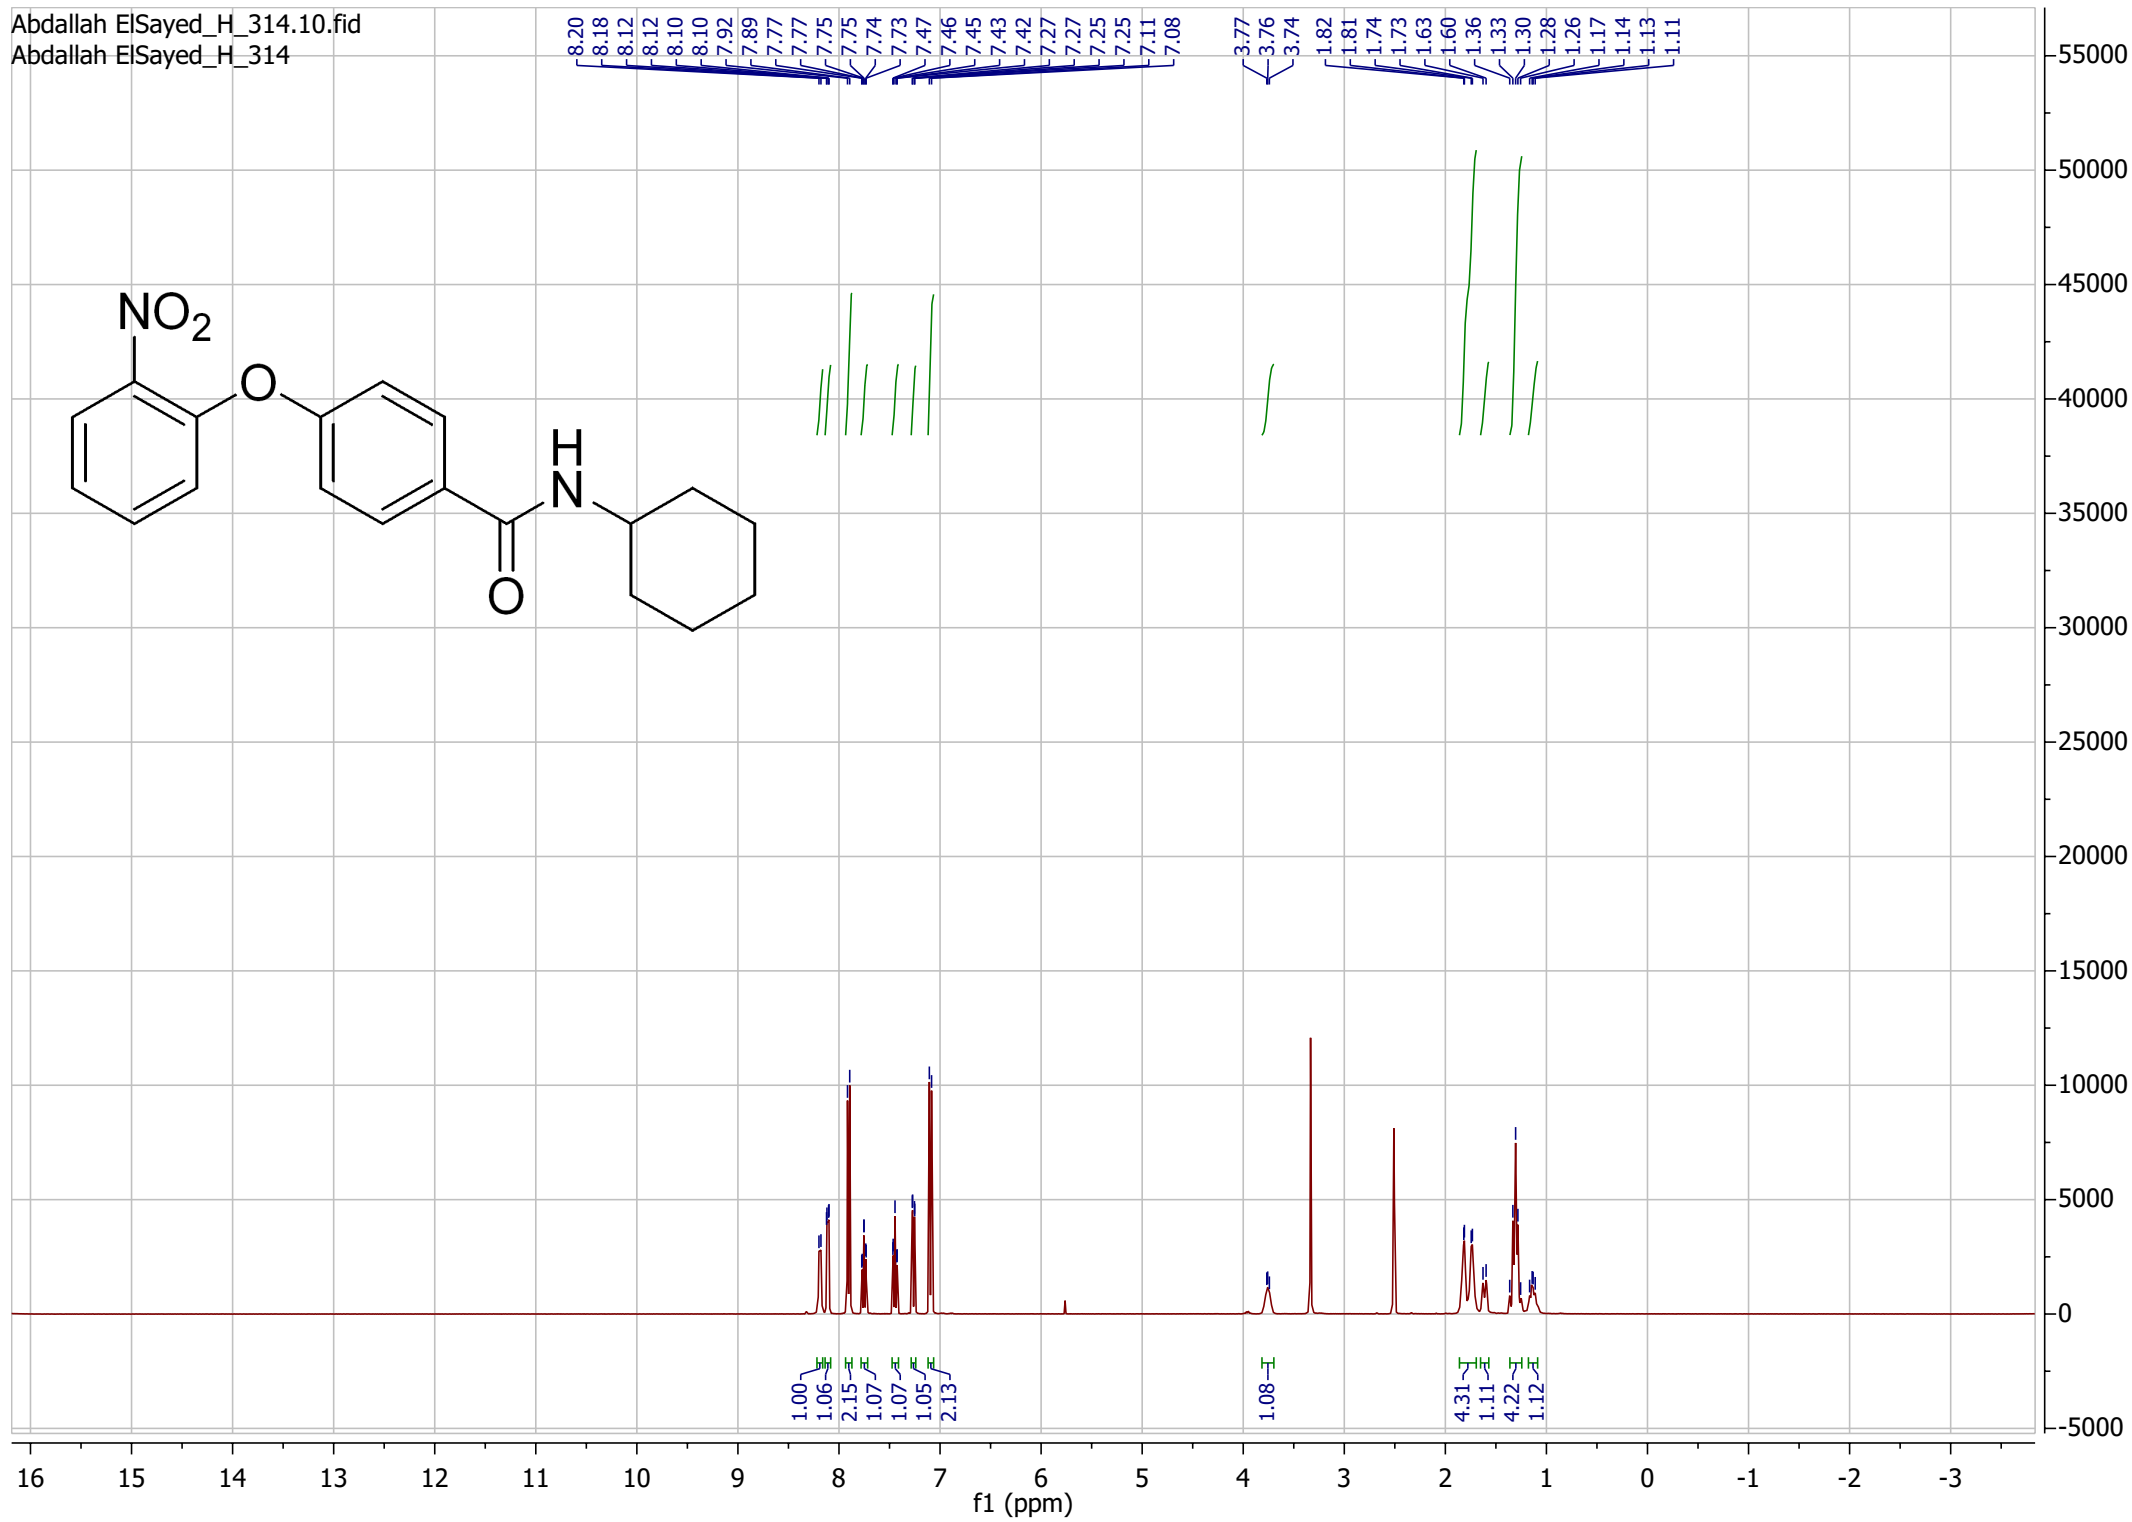

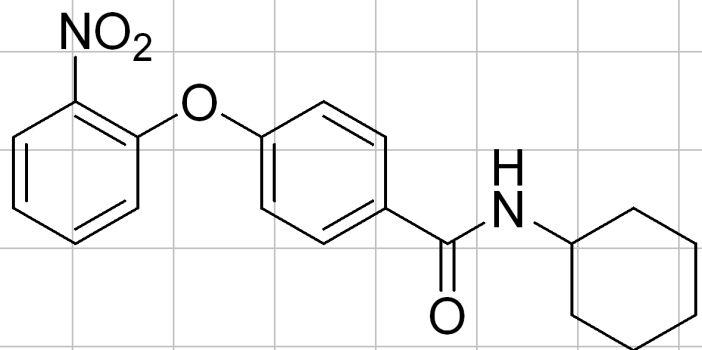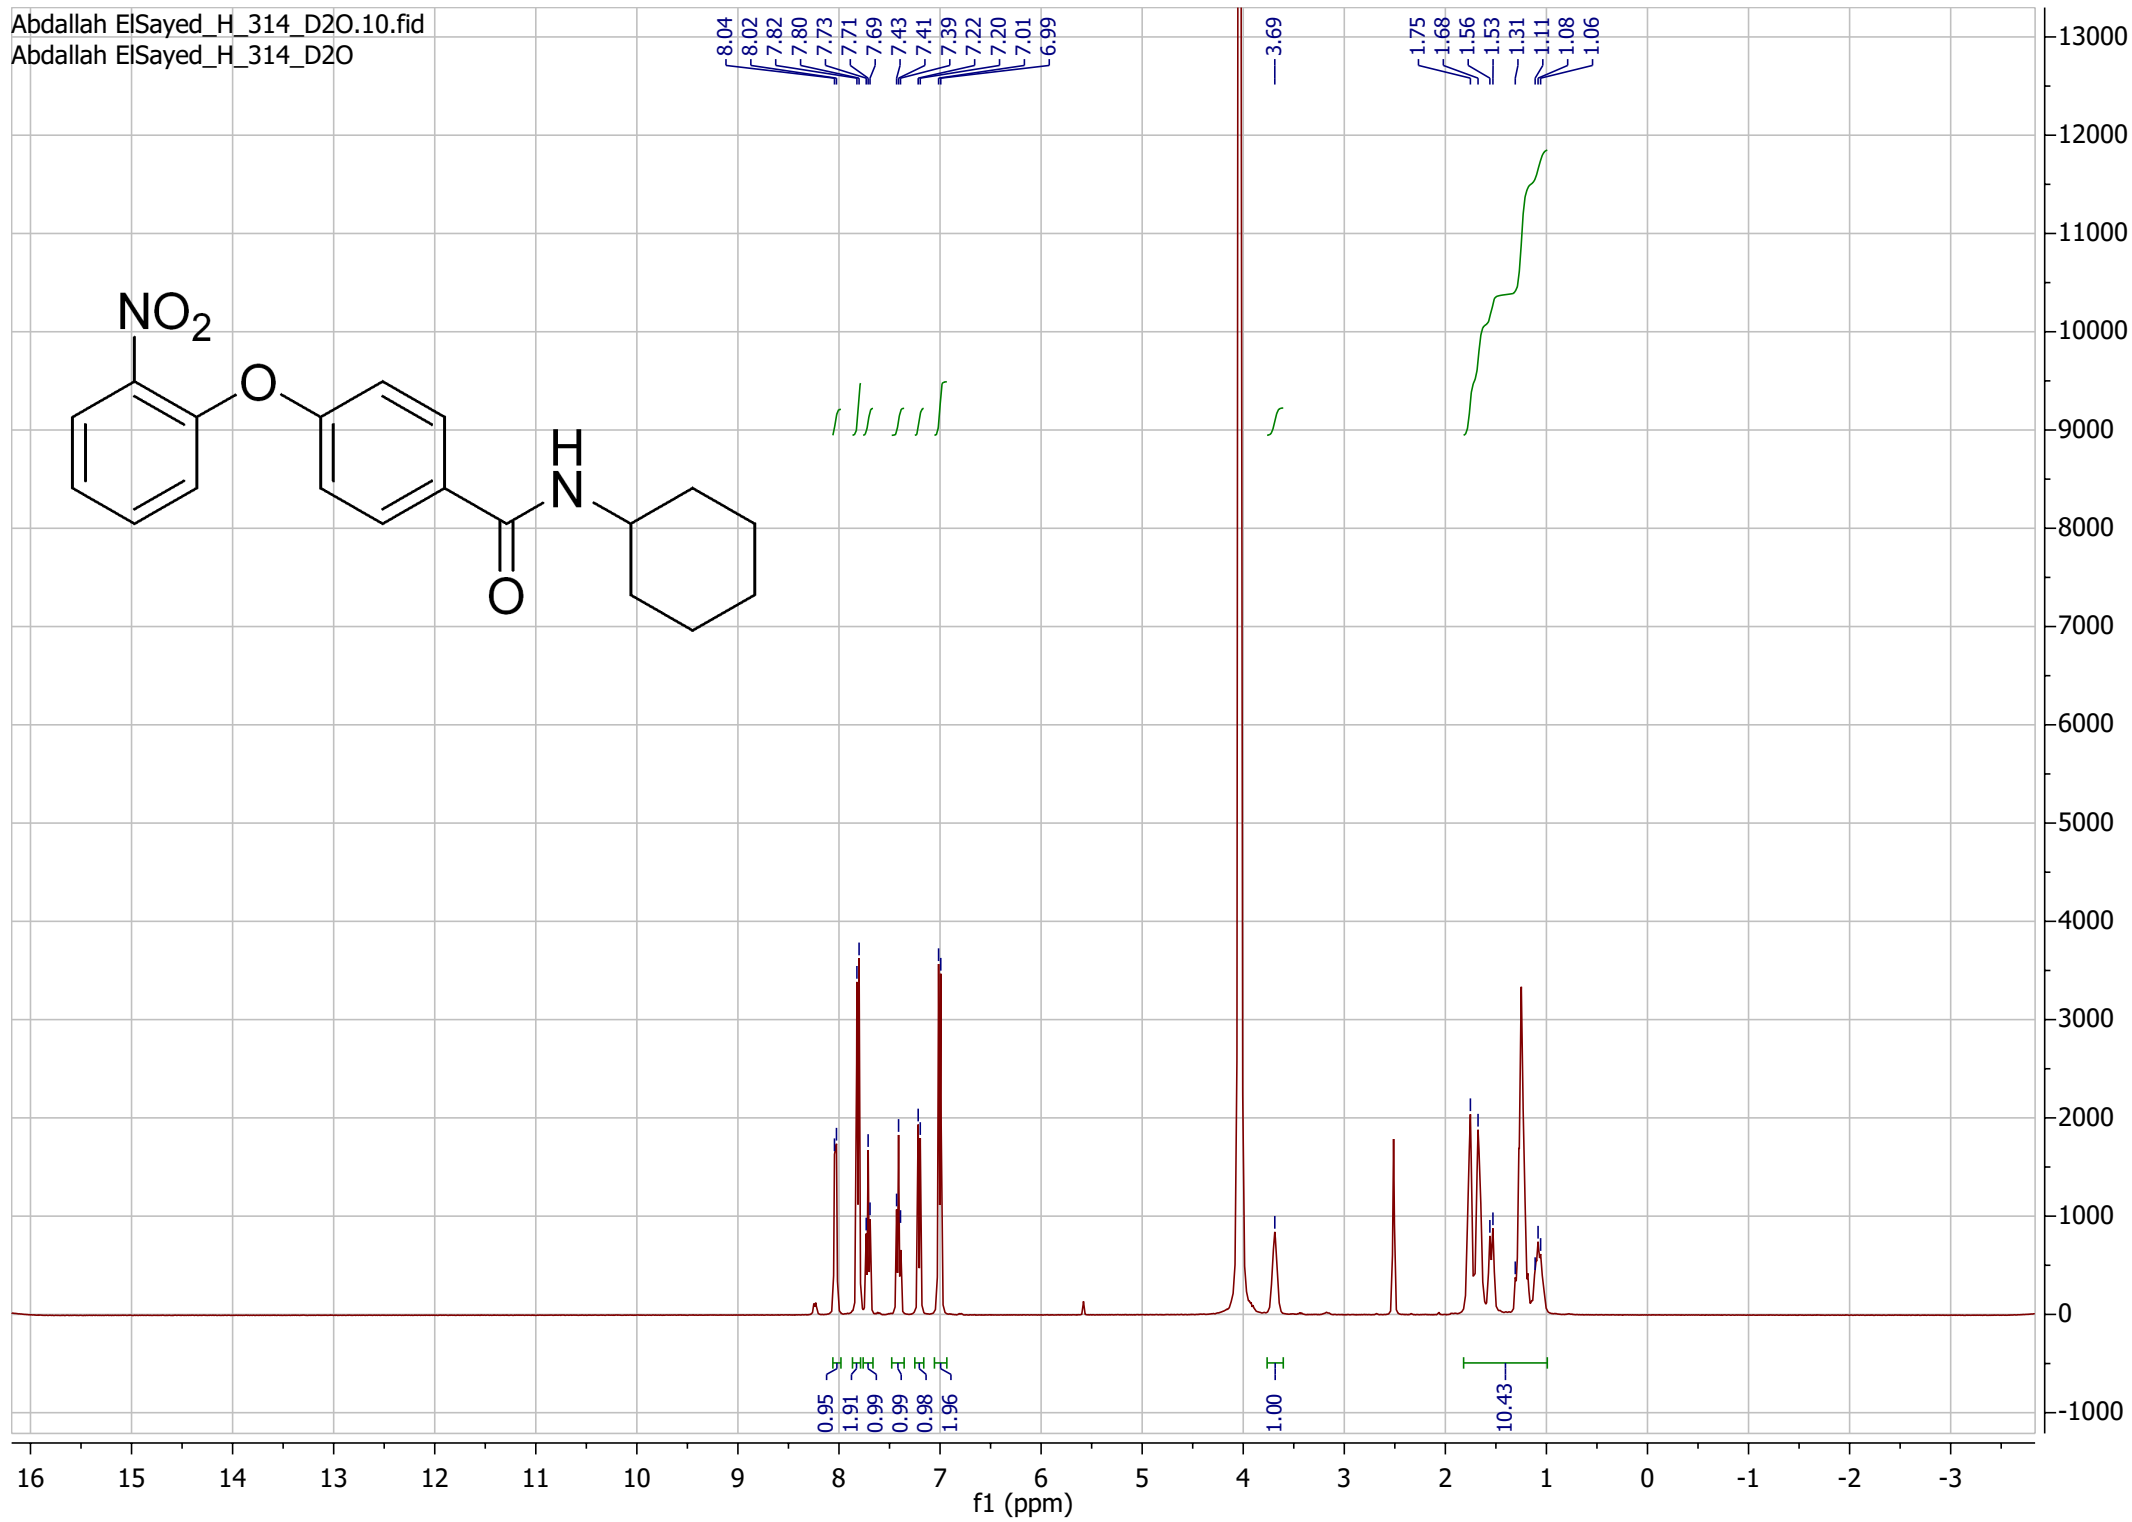

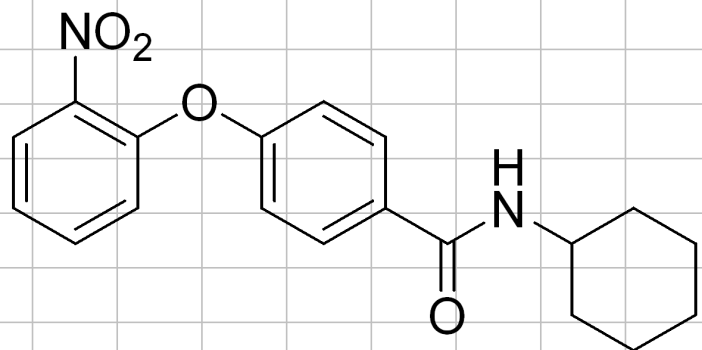

164.97  
158.60  
148.71  
141.97  
135.74  
131.06  
130.06  
126.26  
125.57  
122.47  
117.80

48.85  
32.88  
25.72  
25.41

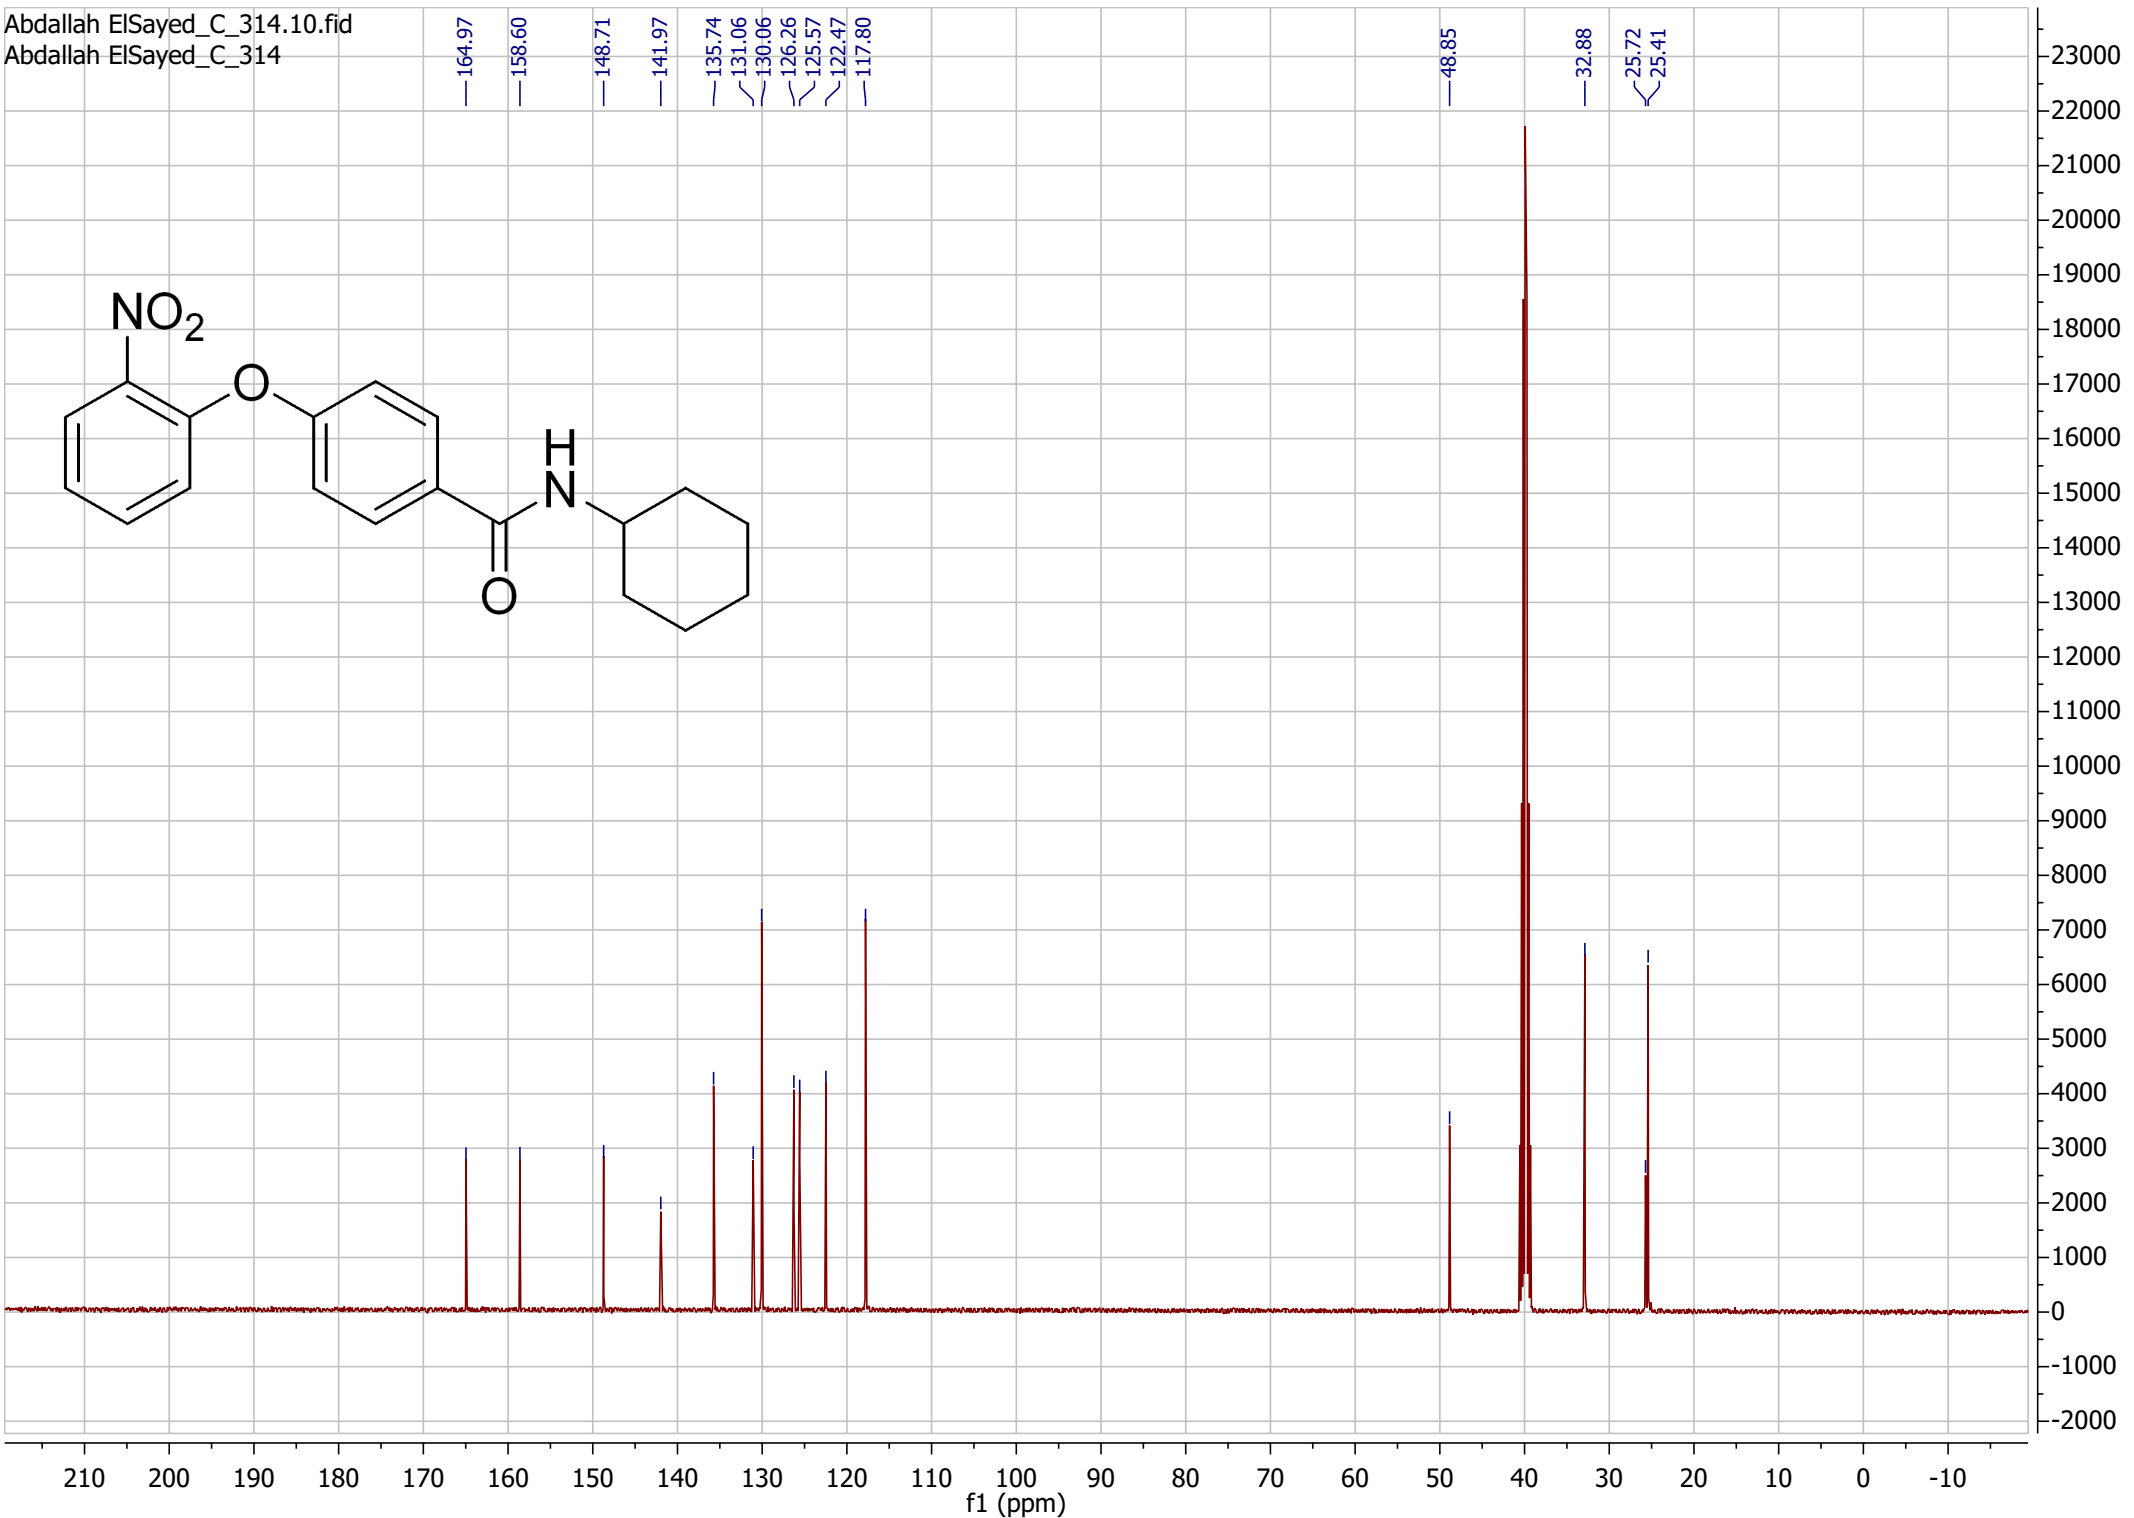

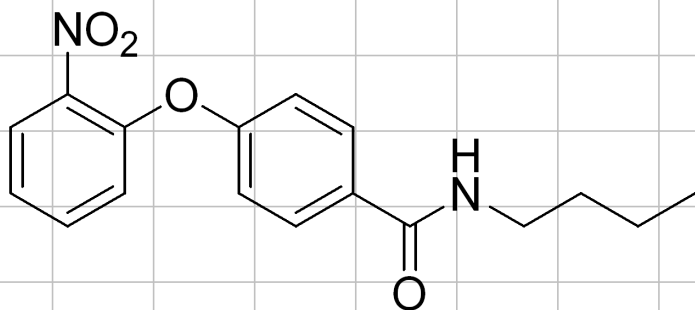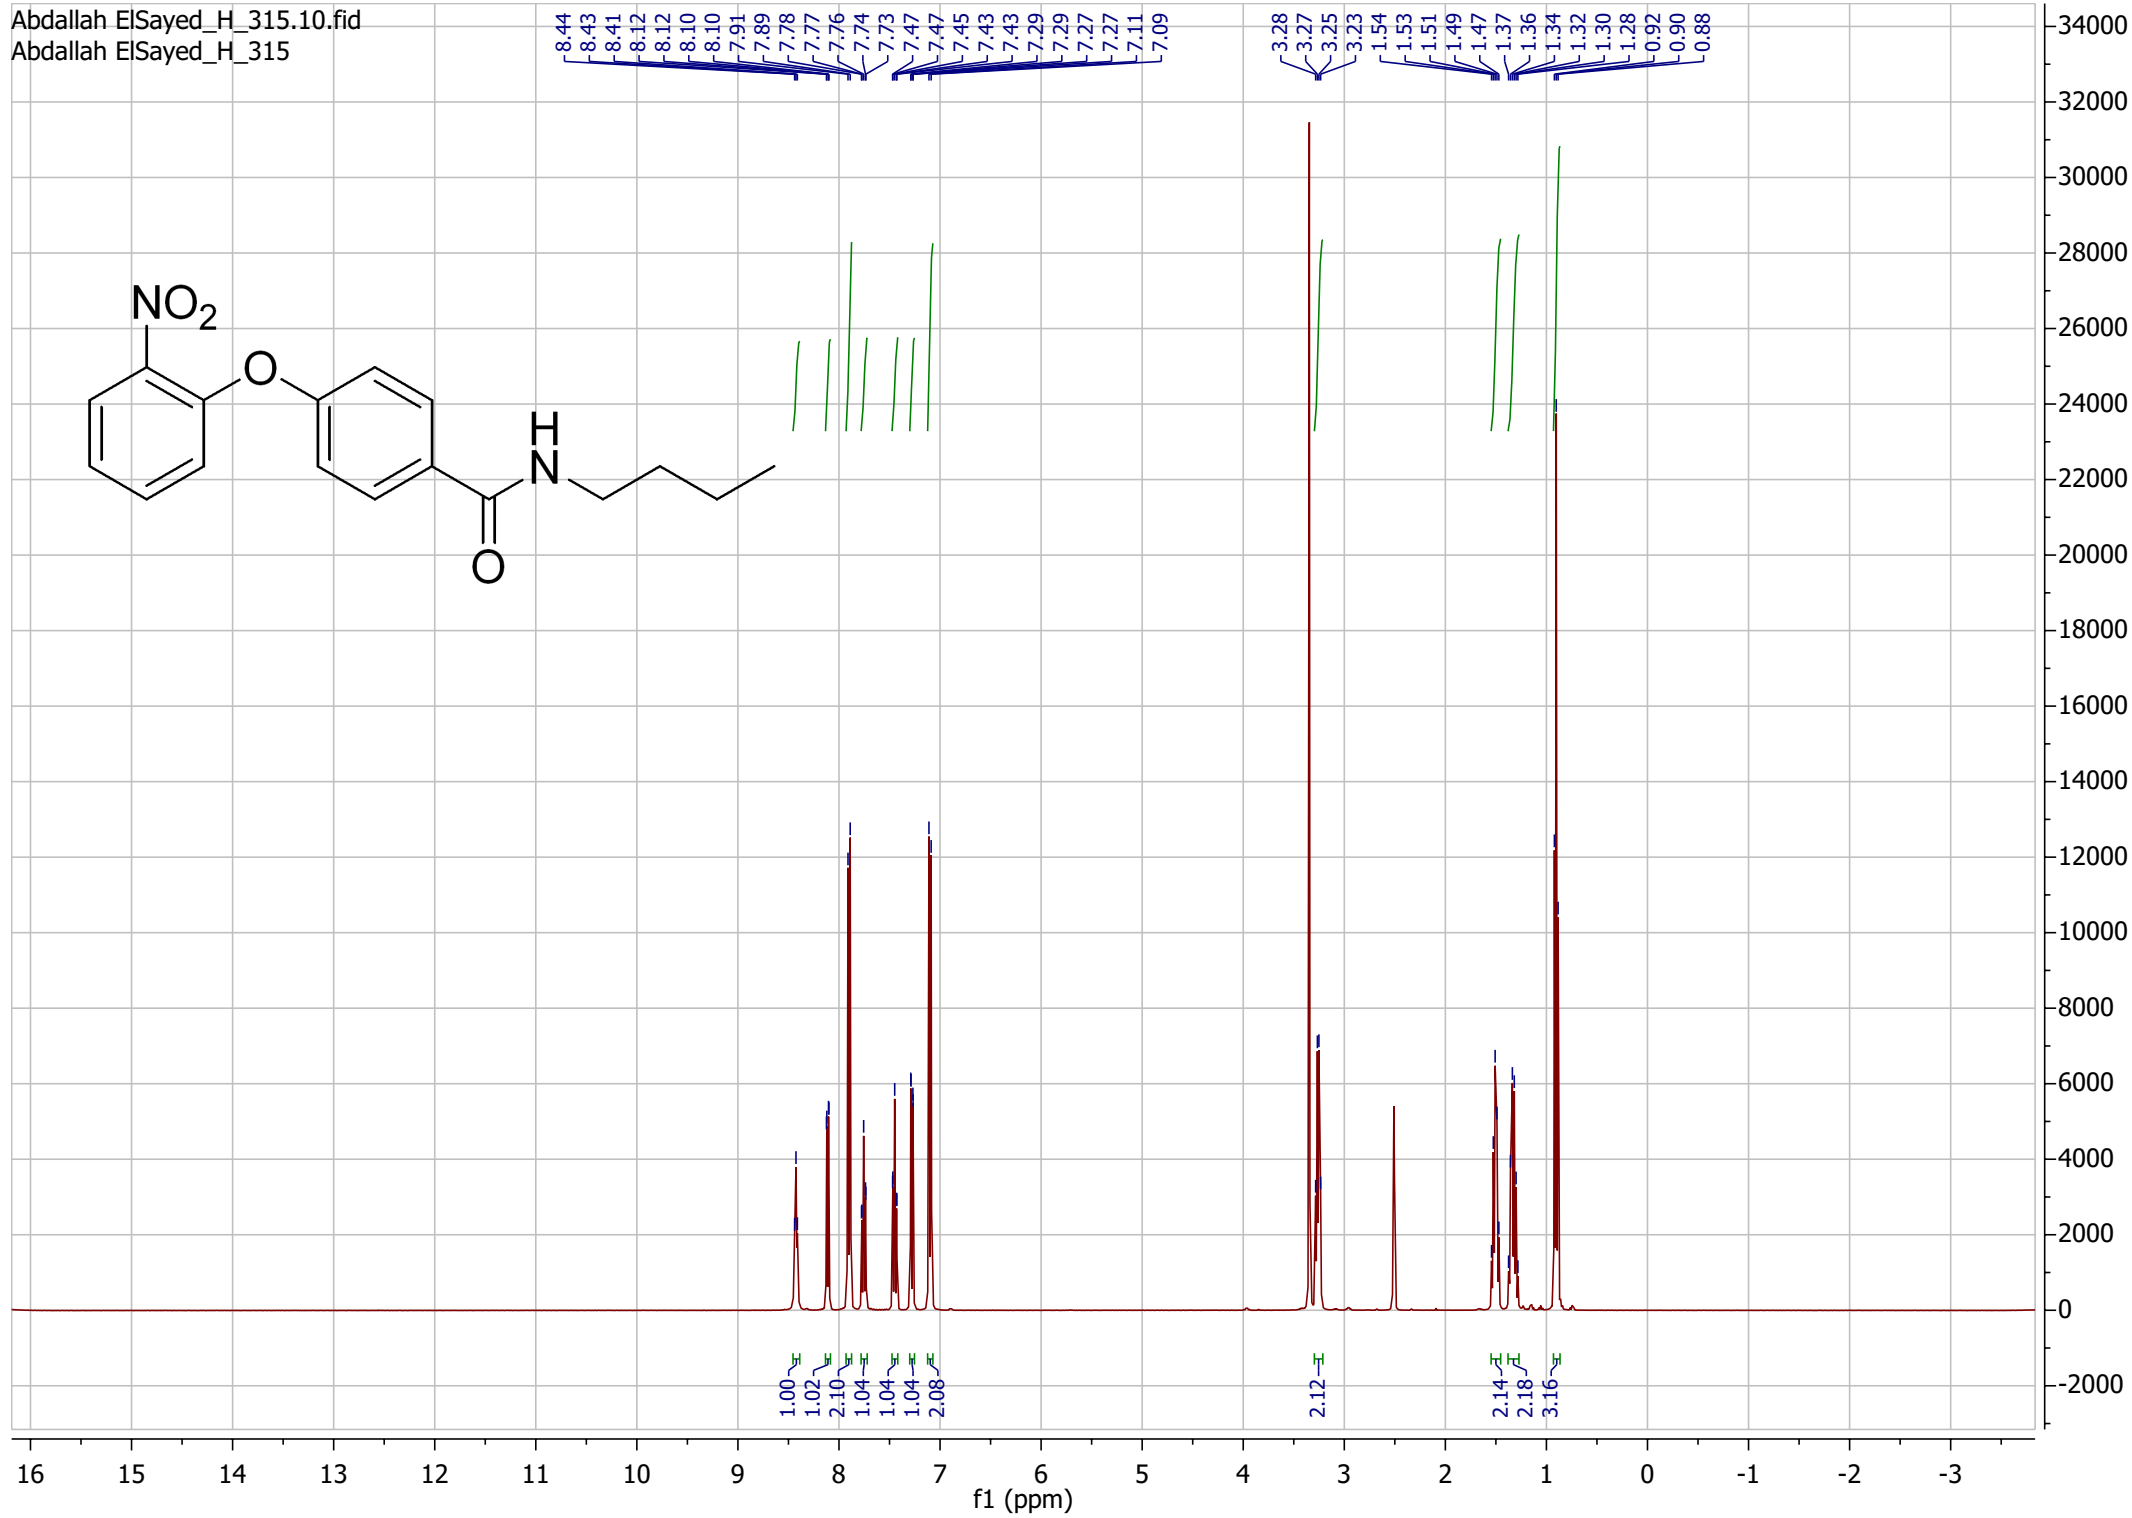

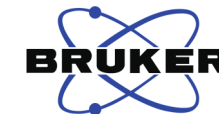

8.4754  
8.4618  
8.4479  
8.0510  
8.0480  
8.0306  
8.0277  
7.8373  
7.8155  
7.7345  
7.7313  
7.7133  
7.6952  
7.6920  
7.4298  
7.4108  
7.3917  
7.2246  
7.2043  
7.0270  
7.0053

3.9398  
3.2486  
3.2323  
3.2191  
3.2025  
2.5111  
1.4925  
1.4749  
1.4570  
1.4386  
1.4203  
1.3101  
1.2916  
1.2727  
1.2540  
1.2360  
1.2180  
0.8559  
0.8376  
0.8192

Current Data Parameters  
 NAME Abdallah ElSayed\_H\_315\_D20  
 EXPNO 10  
 PROCNO 1

F2 - Acquisition Parameters  
 Date\_ 20201129  
 Time 14.44  
 INSTRUM spect  
 PROBHD 5 mm PABBO BB/  
 PULPROG zg30  
 TD 65536  
 SOLVENT DMSO  
 NS 32  
 DS 2  
 SWH 8012.820 Hz  
 FIDRES 0.122266 Hz  
 AQ 4.0894465 sec  
 RG 64.21  
 DW 62.400 usec  
 DE 6.50 usec  
 TE 298.1 K  
 D1 1.0000000 sec  
 TD0 1

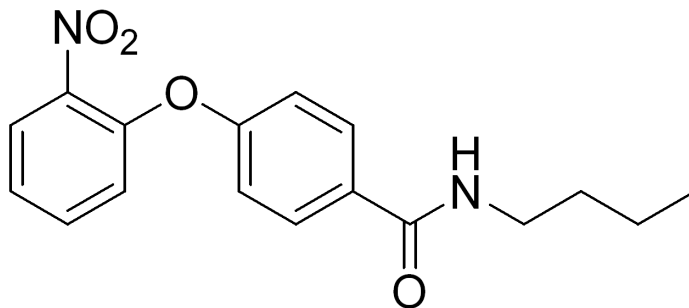

===== CHANNEL f1 =====  
 SF01 400.1924713 MHz  
 NUC1 1H  
 P1 15.00 usec  
 PLW1 10.39999962 W

F2 - Processing parameters  
 SI 65536  
 SF 400.1900000 MHz  
 WDW EM  
 SSB 0  
 LB 0.30 Hz  
 GB 0  
 PC 1.00

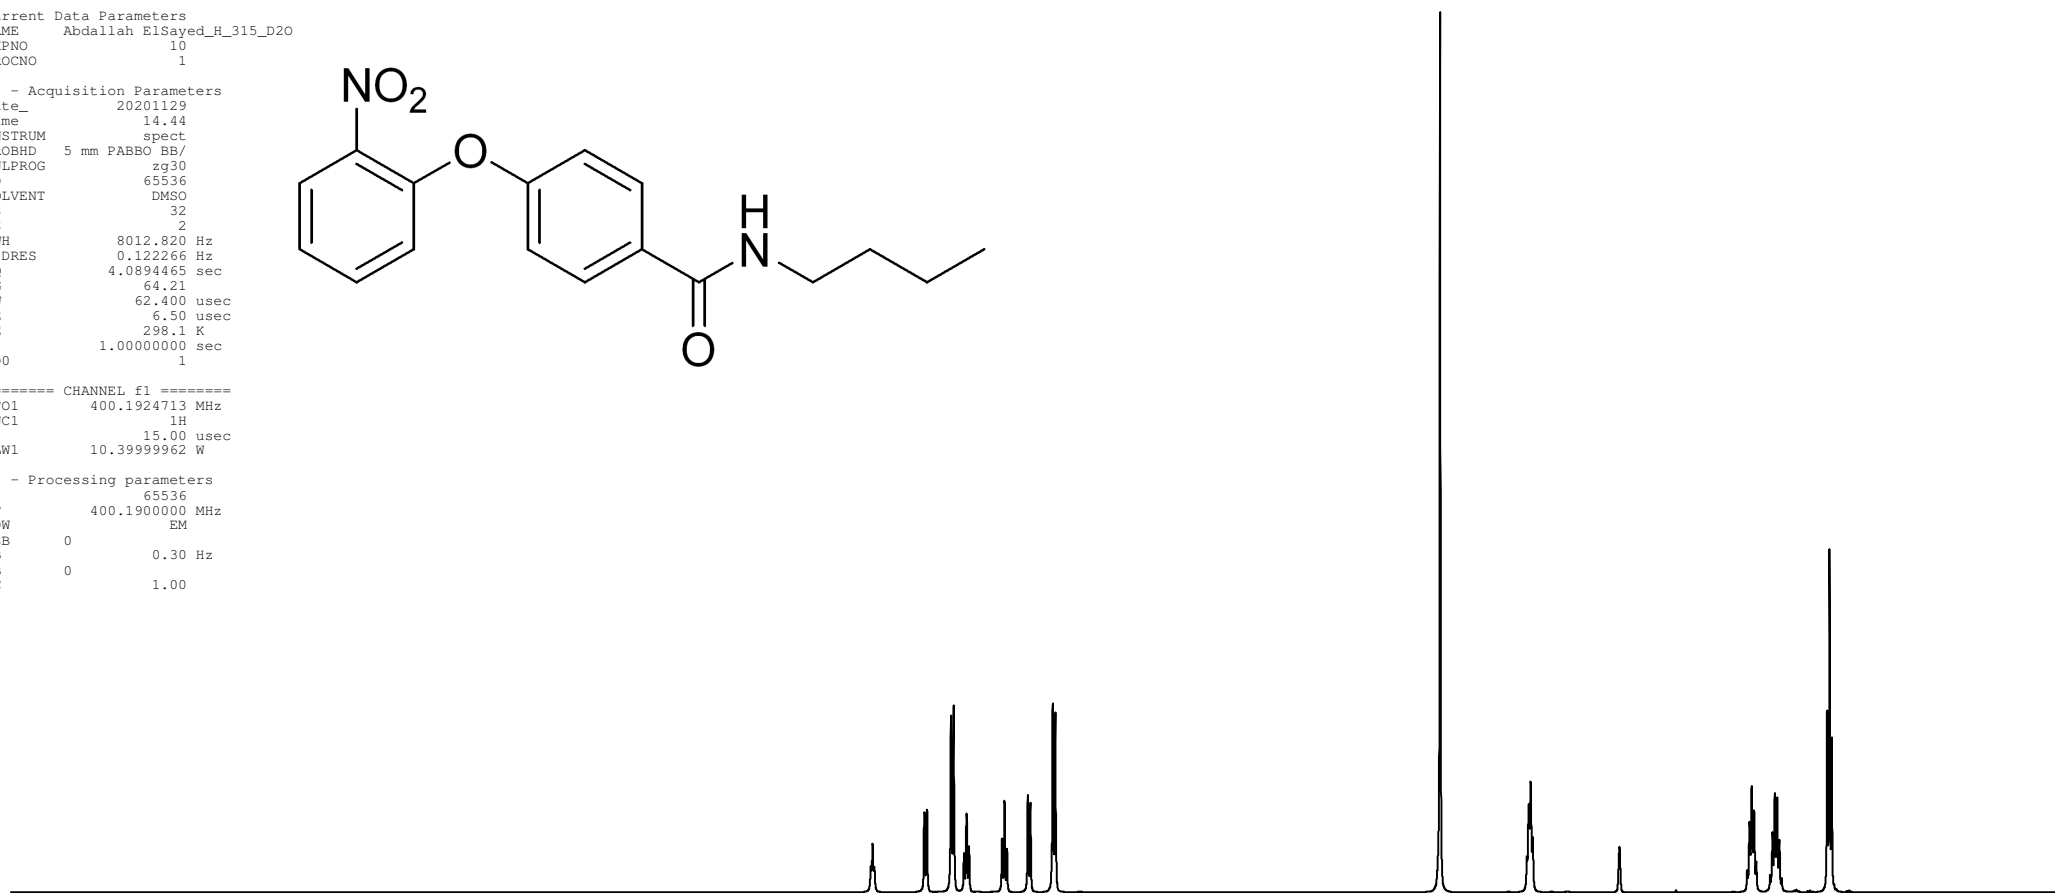

15 14 13 12 11 10 9 8 7 6 5 4 3 2 1 0 ppm

2.89  
4.49  
8.73  
4.50  
4.53  
4.48  
8.96

19.06  
8.91  
1.85  
9.14  
9.26  
13.20

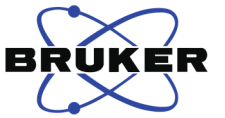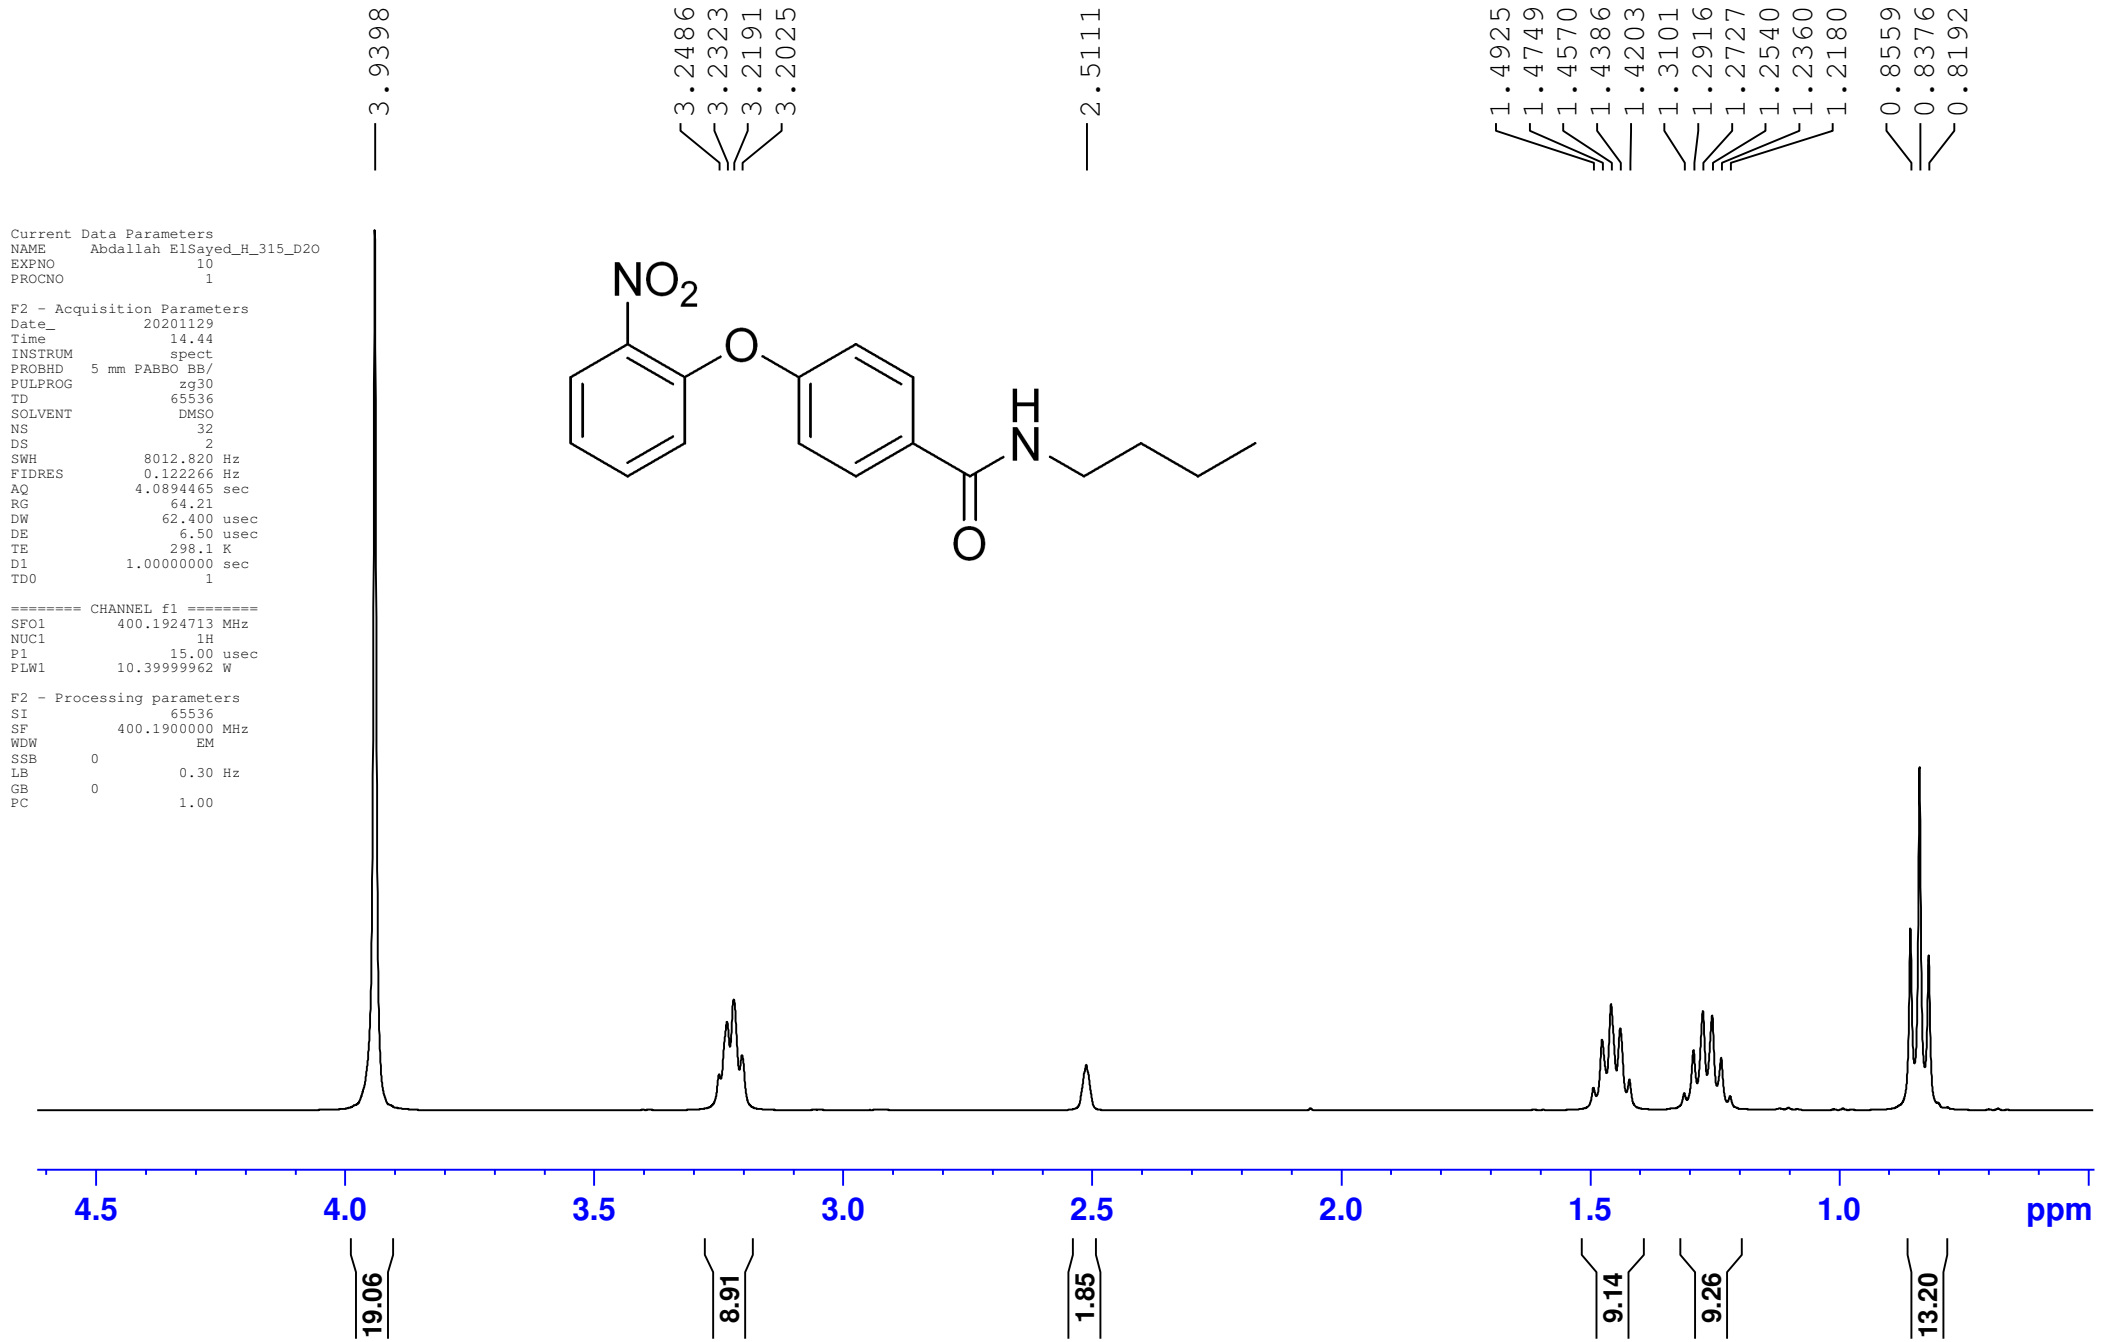



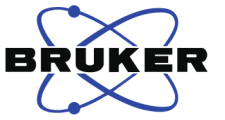

8.4754  
 8.4618  
 8.4479

8.0510  
 8.0480  
 8.0306  
 8.0277  
 7.8373  
 7.8155  
 7.7345  
 7.7313  
 7.7133  
 7.6952  
 7.6920

7.4298  
 7.4108  
 7.3917

7.2246  
 7.2043

7.0270  
 7.0053

Current Data Parameters  
 NAME Abdallah ElSayed\_H\_315\_D20  
 EXPNO 10  
 PROCNO 1

F2 - Acquisition Parameters  
 Date\_ 20201129  
 Time 14.44  
 INSTRUM spect  
 PROBHD 5 mm PABBO BB/  
 PULPROG zg30  
 TD 65536  
 SOLVENT DMSO  
 NS 32  
 DS 2  
 SWH 8012.820 Hz  
 FIDRES 0.122266 Hz  
 AQ 4.0894465 sec  
 RG 64.21  
 DW 62.400 usec  
 DE 6.50 usec  
 TE 298.1 K  
 D1 1.00000000 sec  
 TD0 1

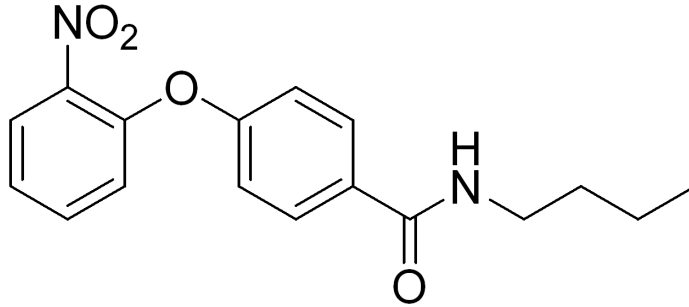

===== CHANNEL f1 =====  
 SF01 400.1924713 MHz  
 NUC1 1H  
 P1 15.00 usec  
 PLW1 10.39999962 W

F2 - Processing parameters  
 SI 65536  
 SF 400.1900000 MHz  
 WDW EM  
 SSB 0  
 LB 0.30 Hz  
 GB 0  
 PC 1.00

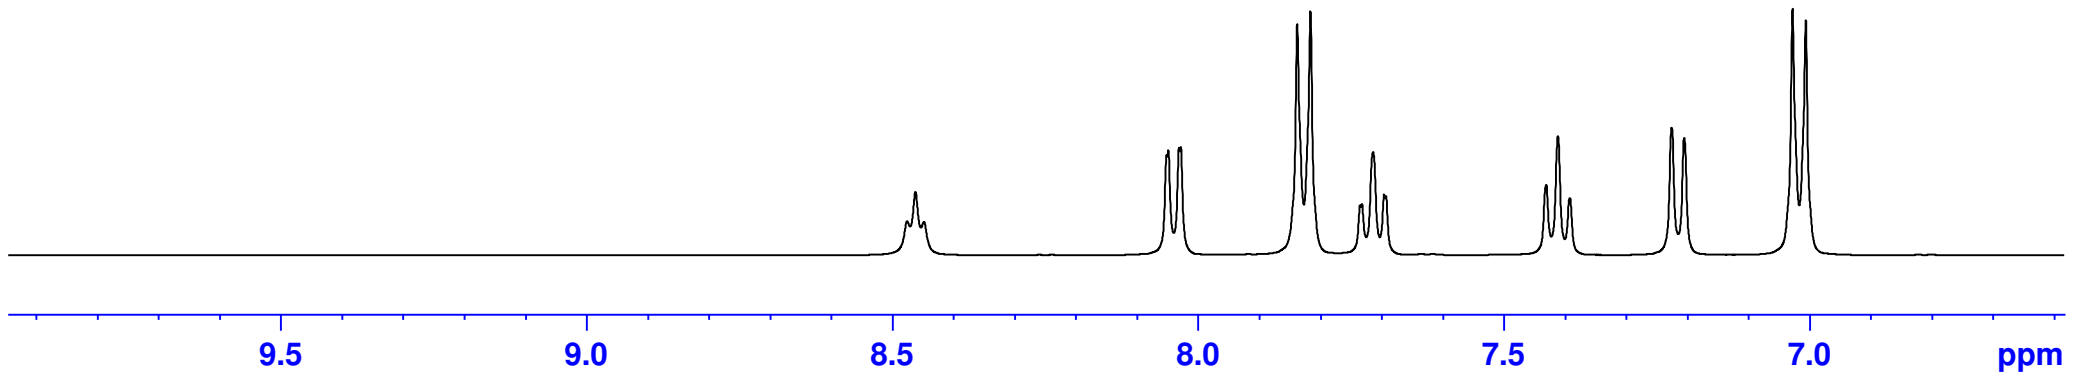

2.89

4.49

8.73

4.50

4.53

4.48

8.96



— 165.67  
 — 158.68  
 — 148.67  
 — 142.02  
 — 135.73  
 — 130.91  
 — 129.91  
 — 126.25  
 — 125.60  
 — 122.58  
 — 117.82

40.60  
 40.40  
 40.19  
 39.98  
 39.77  
 39.56  
 39.34  
 31.73  
 — 20.12  
 — 14.17

Current Data Parameters  
 NAME Abdallah ElSayed\_C\_315  
 EXPNO 10  
 PROCNO 1

F2 - Acquisition Parameters  
 Date\_ 20201125  
 Time 15.14  
 INSTRUM spect  
 PROBHD 5 mm PABBO BB/  
 PULPROG zgpg30  
 TD 65536  
 SOLVENT DMSO  
 NS 1500  
 DS 4  
 SWH 24038.461 Hz  
 FIDRES 0.366798 Hz  
 AQ 1.3631488 sec  
 RG 202.37  
 DW 20.800 usec  
 DE 6.50 usec  
 TE 298.0 K  
 D1 2.00000000 sec  
 D11 0.03000000 sec  
 TD0 1

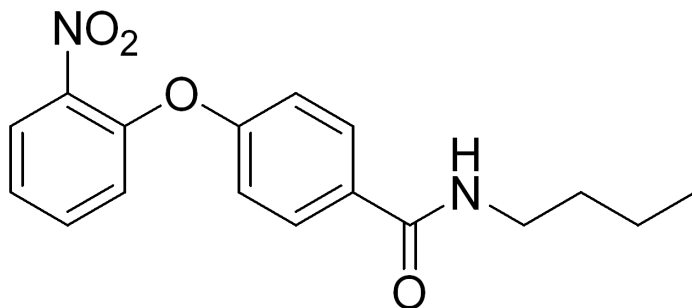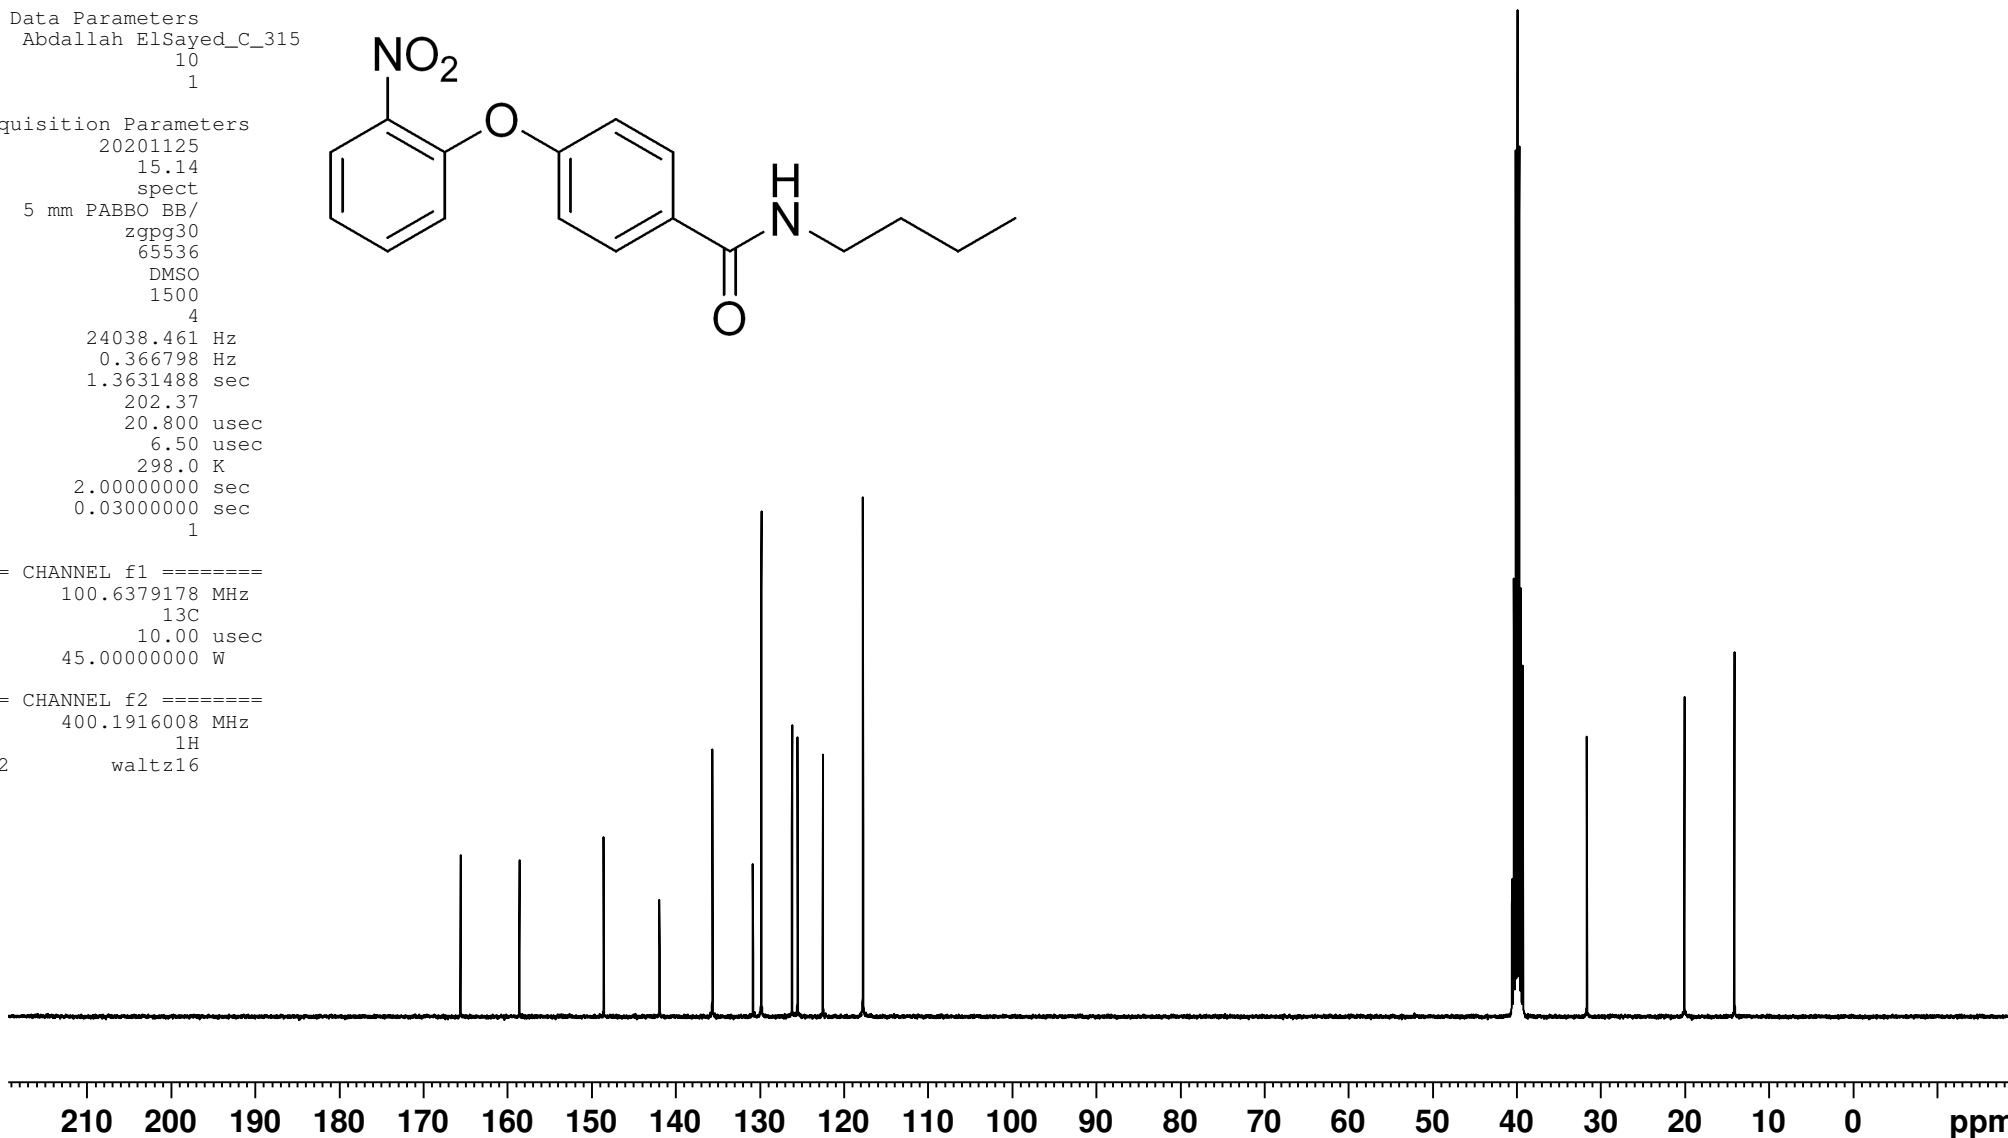

==== CHANNEL f1 =====  
 SFO1 100.6379178 MHz  
 NUC1 13C  
 P1 10.00 usec  
 PLW1 45.00000000 W

==== CHANNEL f2 =====  
 SFO2 400.1916008 MHz  
 NUC2 1H  
 CPDPRG[2] waltz16

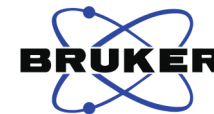

Current Data Parameters  
NAME Abdallah ElSayed\_C\_315  
EXPNO 10  
PROCNO 1

F2 - Acquisition Parameters  
Date\_ 20201125  
Time 15.14  
INSTRUM spect  
PROBHD 5 mm PABBO BB/  
PULPROG zgpg30  
TD 65536  
SOLVENT DMSO  
NS 1500  
DS 4  
SWH 24038.461 Hz  
FIDRES 0.366798 Hz  
AQ 1.3631488 sec  
RG 202.37  
DW 20.800 usec  
DE 6.50 usec  
TE 298.0 K  
D1 2.00000000 sec  
D11 0.03000000 sec  
TDO 1

==== CHANNEL f1 =====  
SFO1 100.6379178 MHz  
NUC1 13C  
P1 10.00 usec  
PLW1 45.00000000 W

==== CHANNEL f2 =====  
SFO2 400.1916008 MHz  
NUC2 1H  
CPDPRG[2] waltz16

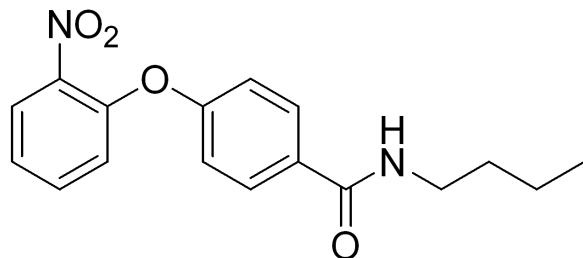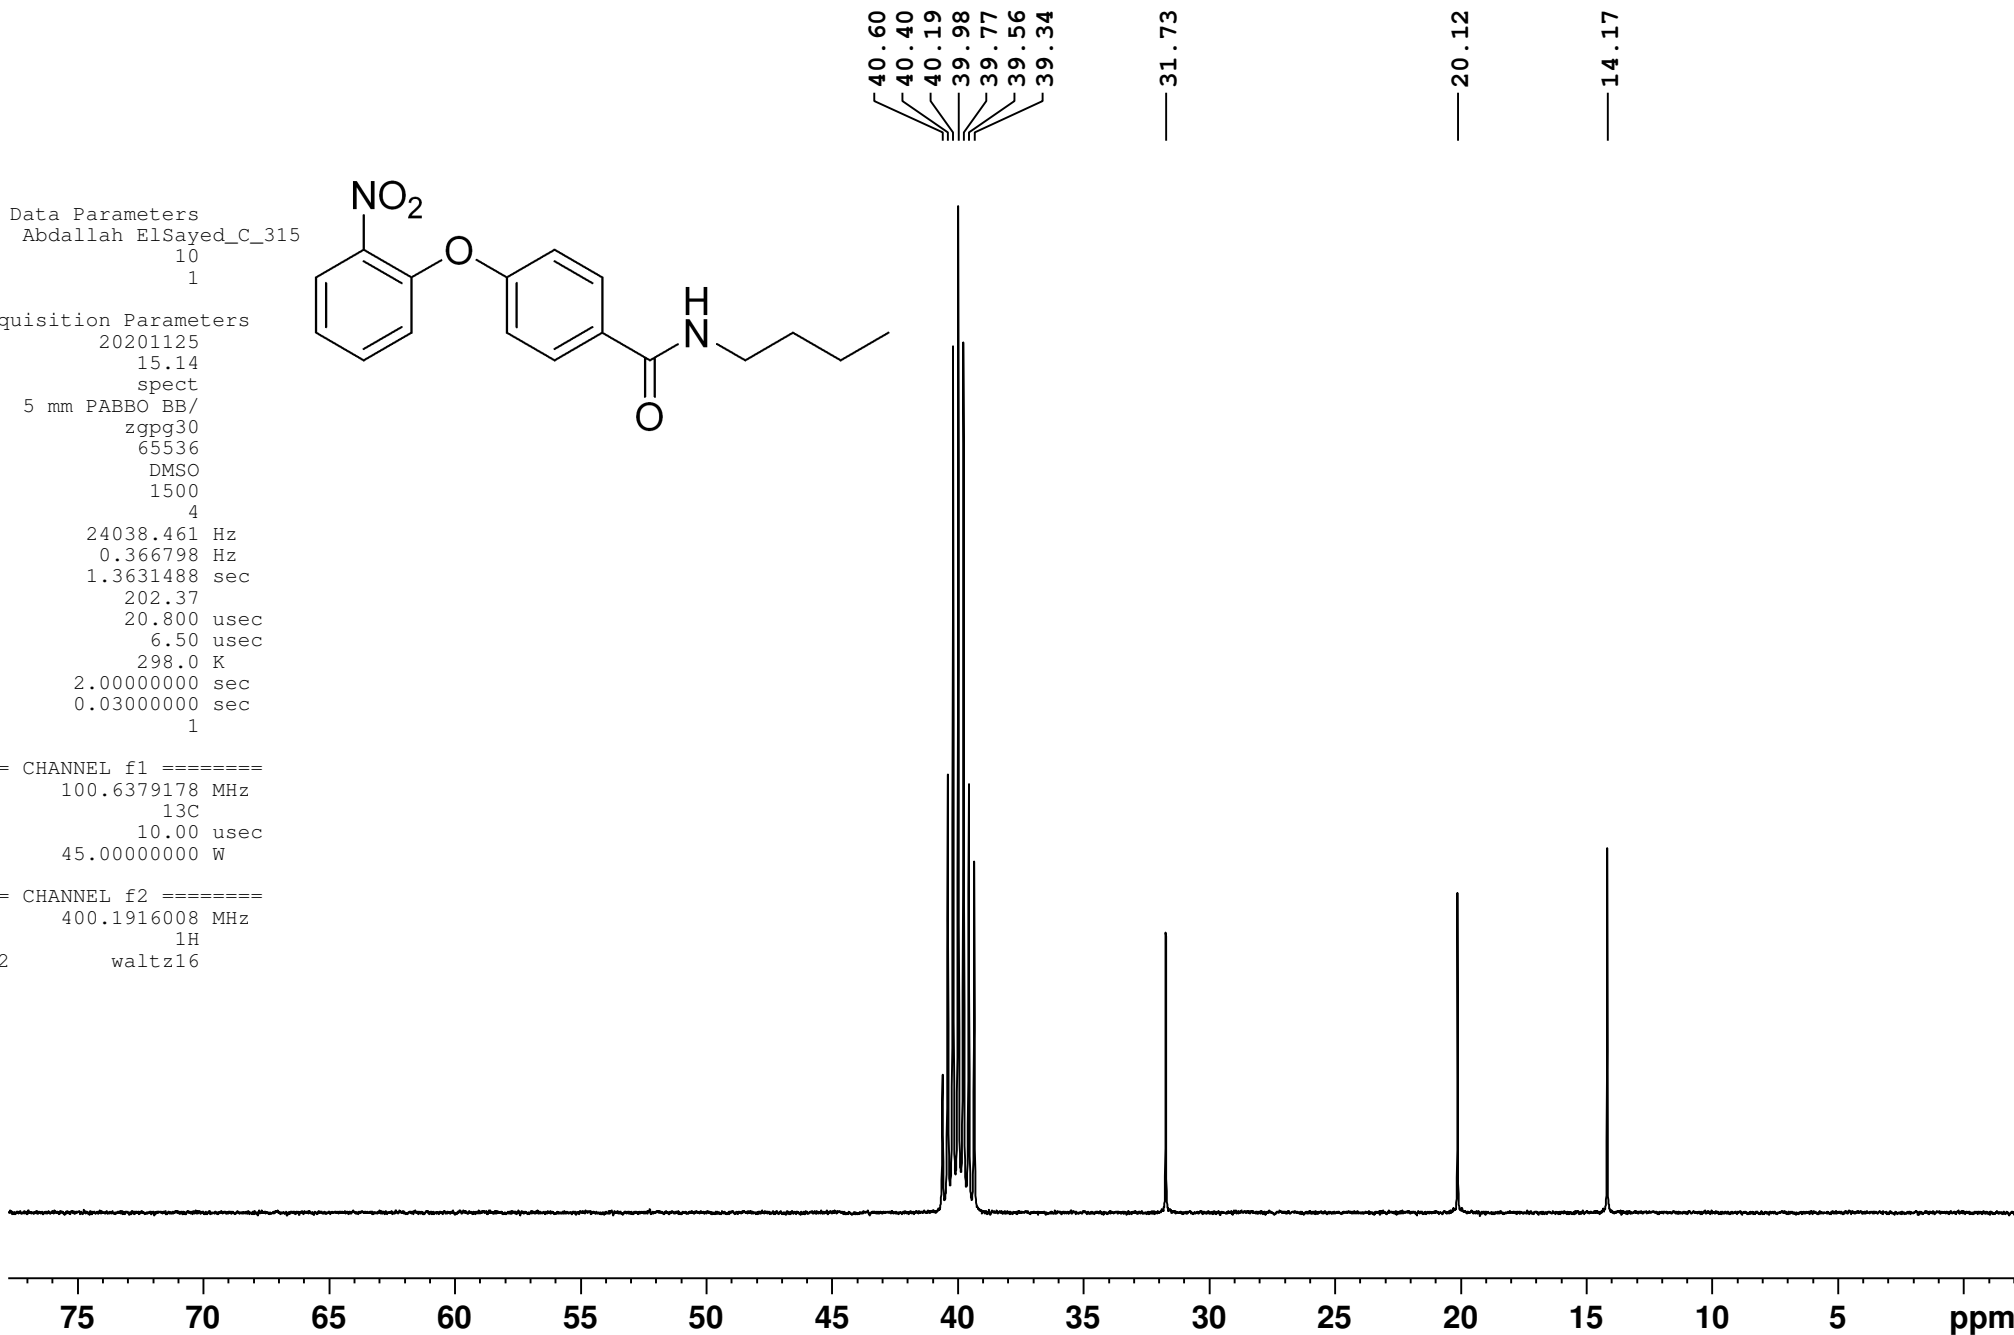



Abdallah ElSayed\_H\_312.1051  
Abdallah ElSayed\_H\_312

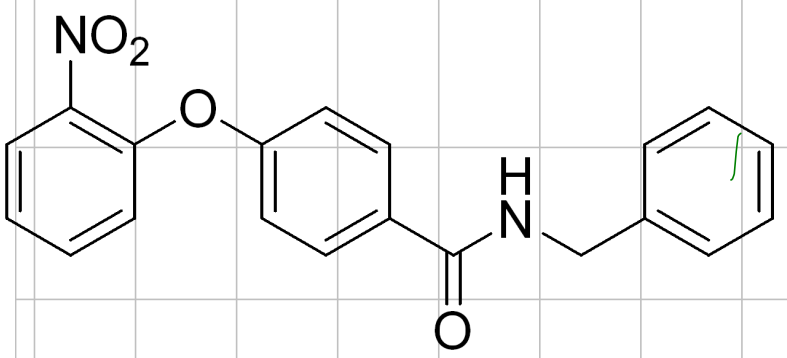

9.08  
9.04  
8.13  
8.13  
8.11  
8.11  
7.98  
7.96  
7.78  
7.78  
7.76  
7.76  
7.74  
7.74  
7.48  
7.47  
7.46  
7.44  
7.44  
7.34  
7.32  
7.31  
7.31  
7.29  
7.29  
7.28  
7.26  
7.25  
7.24  
7.23  
7.22  
7.13  
7.11  
4.50  
4.49

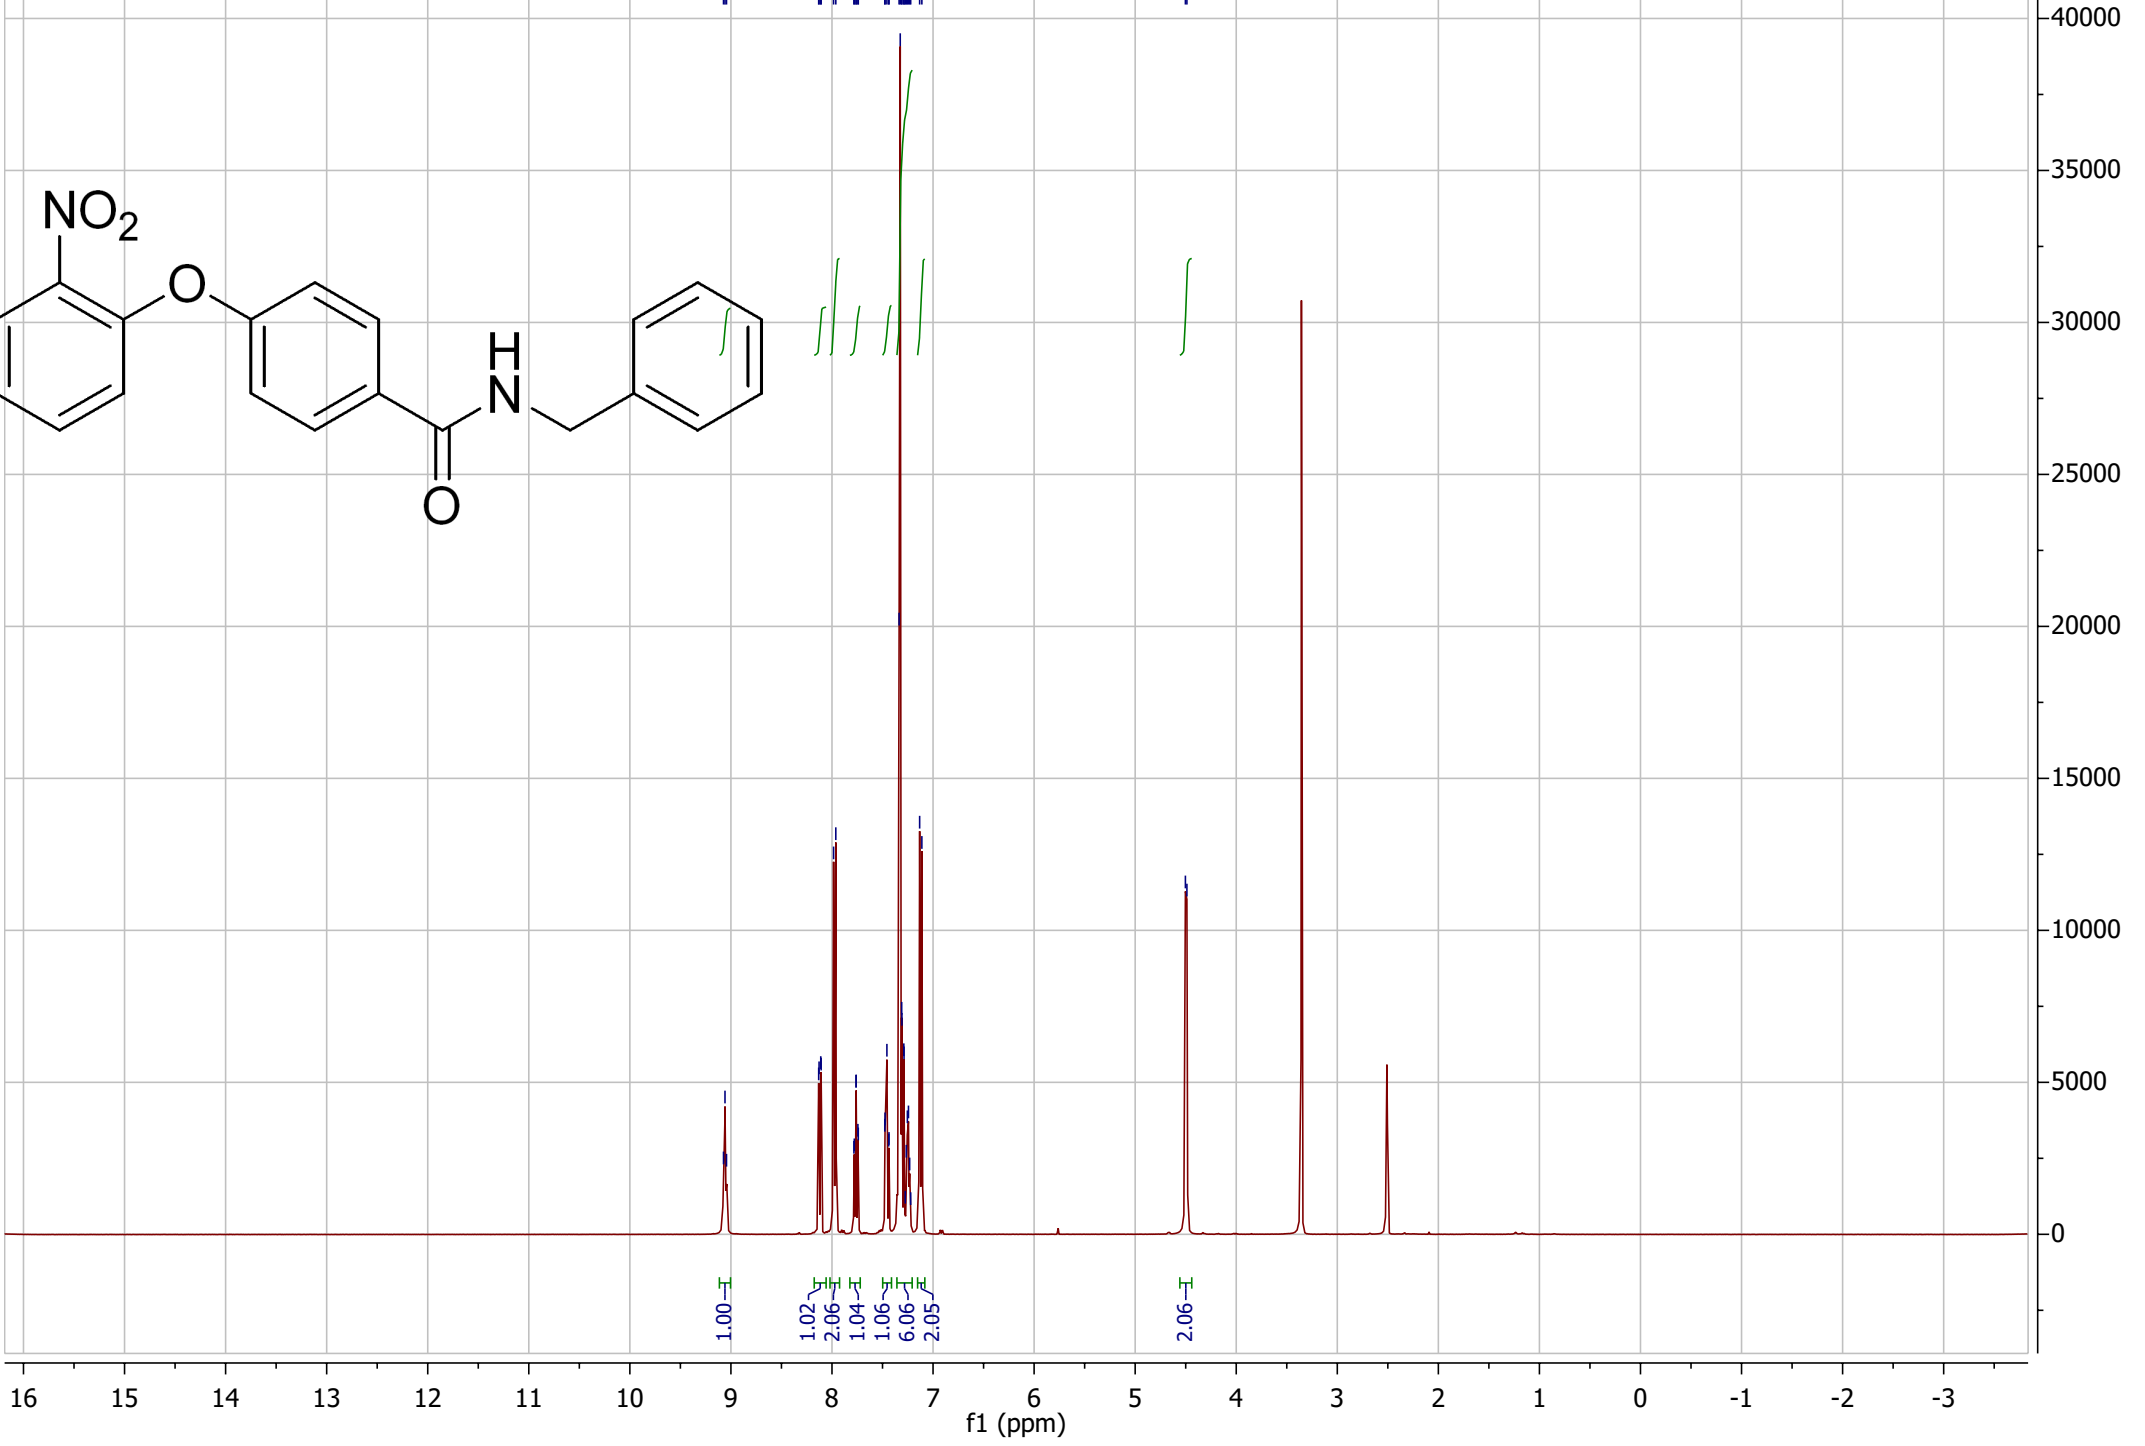

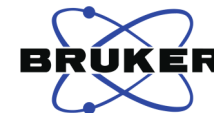

165.82  
 158.96  
 148.58  
 142.06  
 140.15  
 135.77  
 130.45  
 130.08  
 128.74  
 127.65  
 127.19  
 126.28  
 125.70  
 122.73  
 117.85

43.10  
 40.60  
 40.40  
 40.19  
 39.98  
 39.77  
 39.56  
 39.35

Current Data Parameters  
 NAME Abdallah ElSayed\_C\_312  
 EXPNO 10  
 PROCNO 1

F2 - Acquisition Parameters  
 Date\_ 20201125  
 Time 16.42  
 INSTRUM spect  
 PROBHD 5 mm PABBO BB/  
 PULPROG zgpg30  
 TD 65536  
 SOLVENT DMSO  
 NS 1500  
 DS 4  
 SWH 24038.461 Hz  
 FIDRES 0.366798 Hz  
 AQ 1.3631488 sec  
 RG 202.37  
 DW 20.800 usec  
 DE 6.50 usec  
 TE 298.0 K  
 D1 2.00000000 sec  
 D11 0.03000000 sec  
 TD0 1

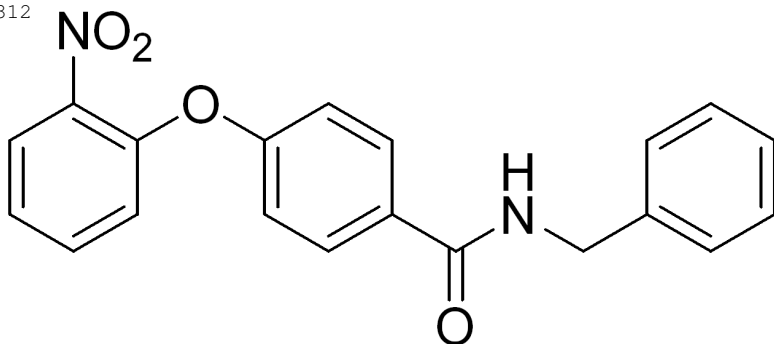

==== CHANNEL f1 =====  
 SFO1 100.6379178 MHz  
 NUC1 13C  
 P1 10.00 usec  
 PLW1 45.00000000 W  
 ===== CHANNEL f2 =====  
 SFO2 400.1916008 MHz  
 NUC2 1H  
 CPDPRG[2] waltz16

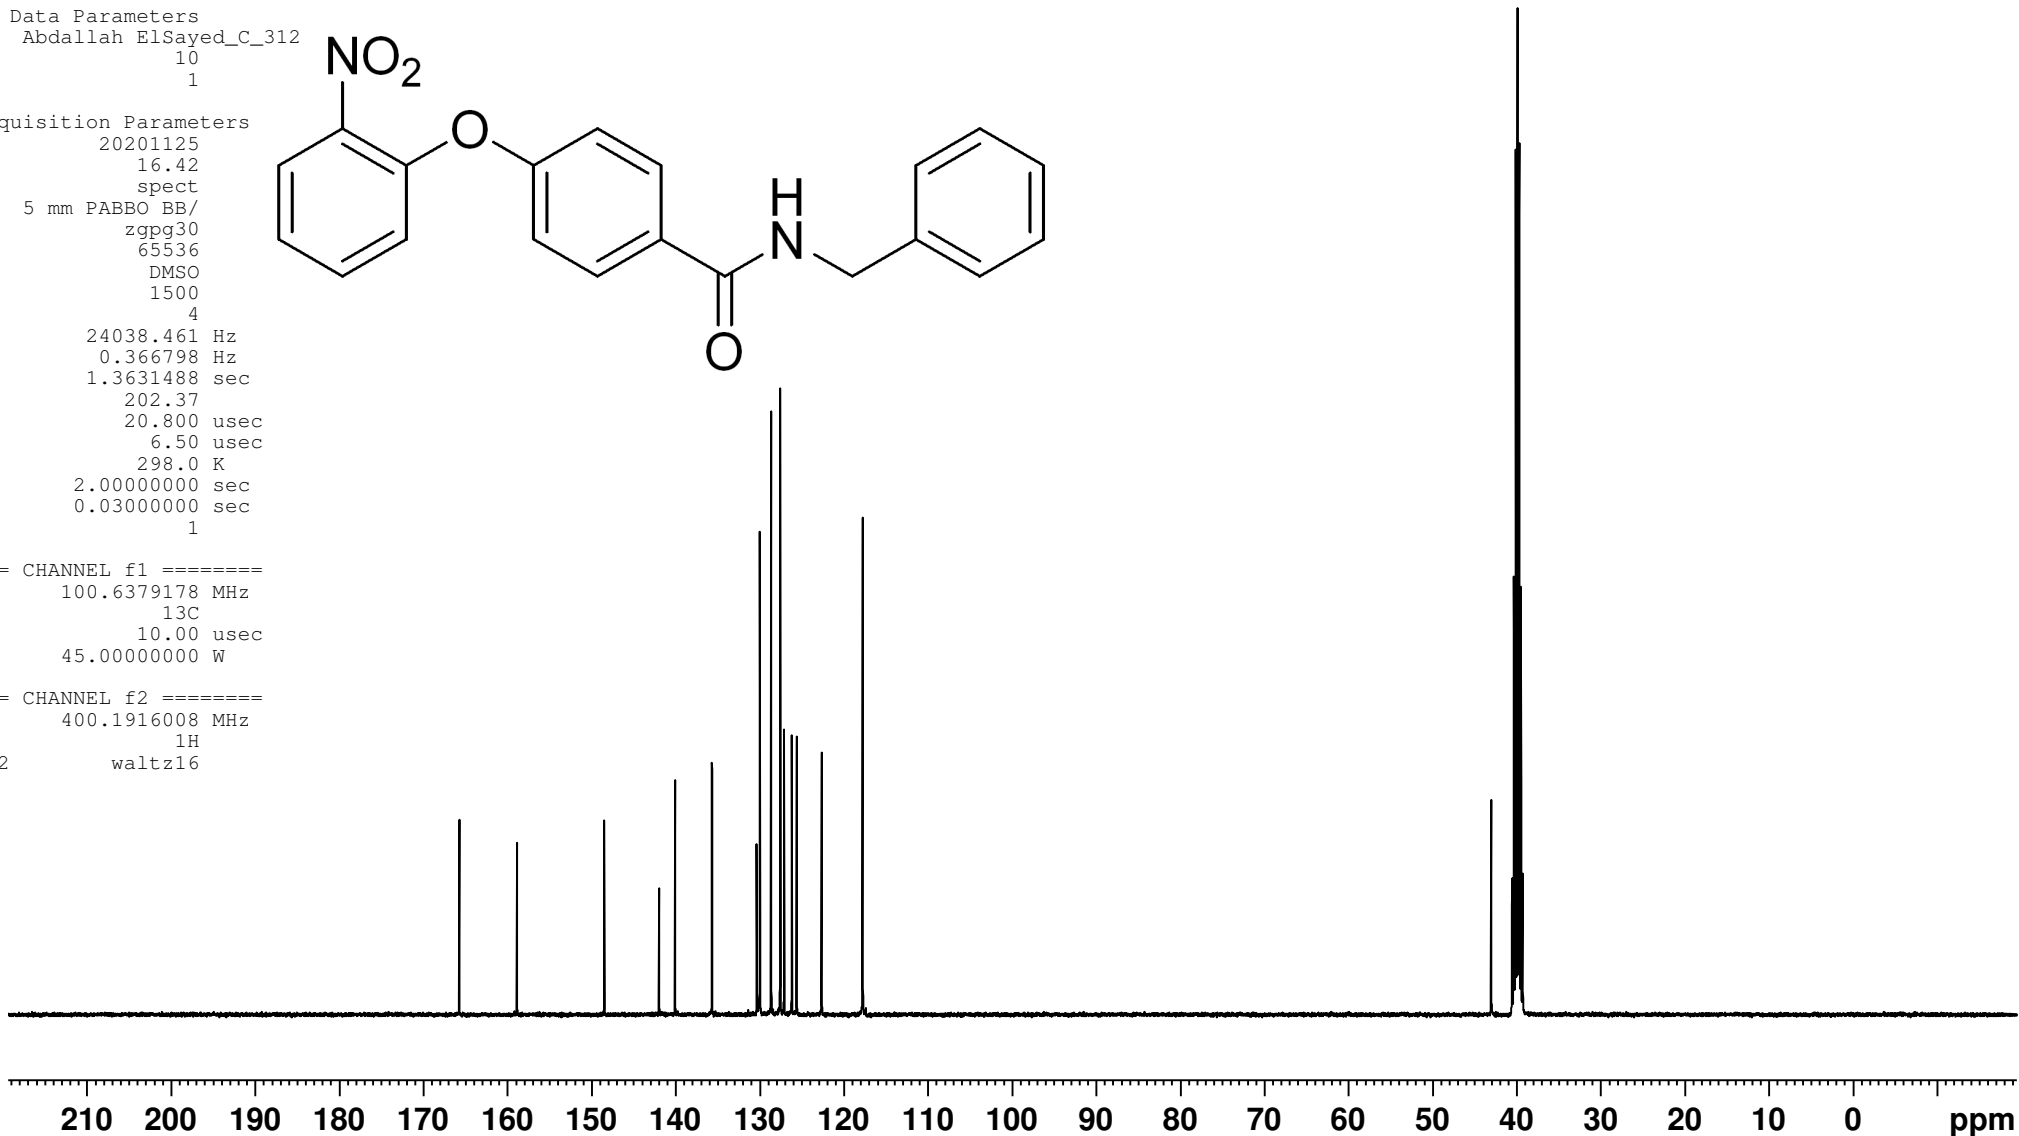



43.10  
 40.60  
 40.40  
 40.19  
 39.98  
 39.77  
 39.56  
 39.35

Current Data Parameters  
 NAME Abdallah ElSayed\_C\_312  
 EXPNO 10  
 PROCNO 1

F2 - Acquisition Parameters  
 Date\_ 20201125  
 Time 16.42  
 INSTRUM spect  
 PROBHD 5 mm PABBO BB/  
 PULPROG zgpg30  
 TD 65536  
 SOLVENT DMSO  
 NS 1500  
 DS 4  
 SWH 24038.461 Hz  
 FIDRES 0.366798 Hz  
 AQ 1.3631488 sec  
 RG 202.37  
 DW 20.800 usec  
 DE 6.50 usec  
 TE 298.0 K  
 D1 2.00000000 sec  
 D11 0.03000000 sec  
 TD0 1

==== CHANNEL f1 =====  
 SFO1 100.6379178 MHz  
 NUC1 13C  
 P1 10.00 usec  
 PLW1 45.00000000 W

==== CHANNEL f2 =====  
 SFO2 400.1916008 MHz  
 NUC2 1H  
 CPDPRG[2] waltz16

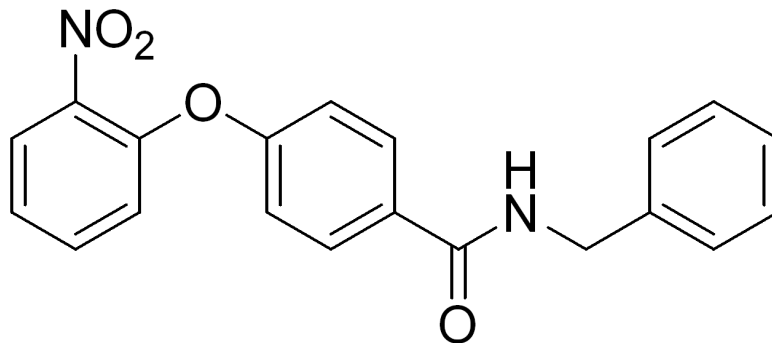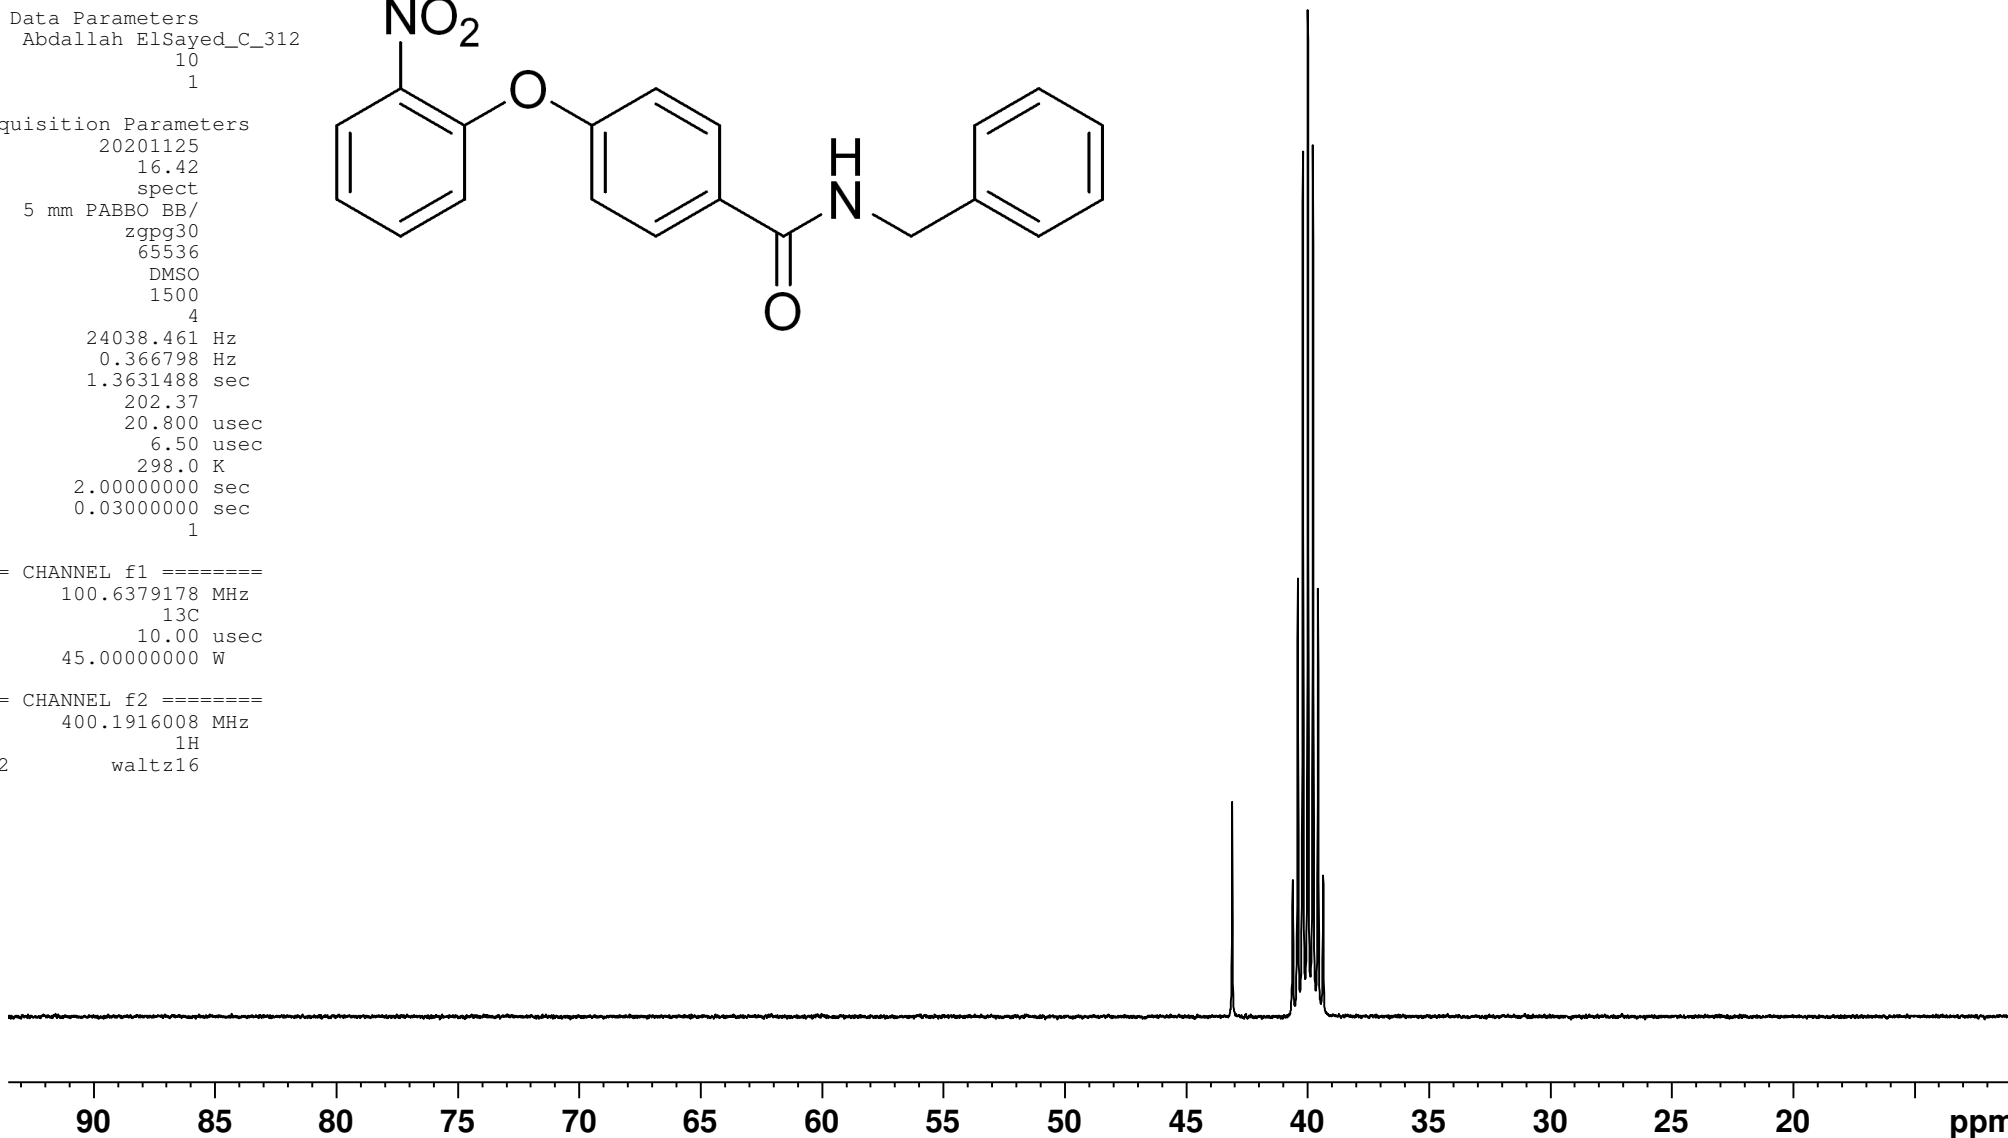

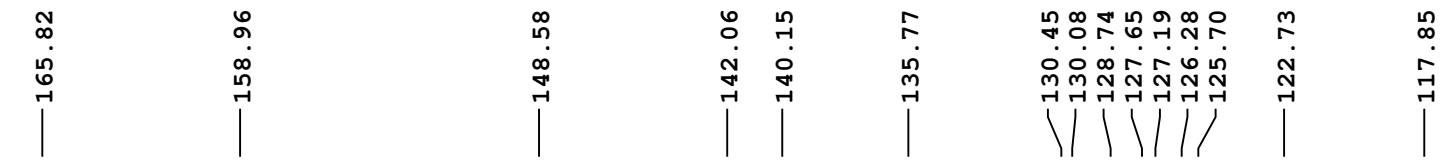

Current Data Parameters  
 NAME Abdallah ElSayed\_C\_312  
 EXPNO 10  
 PROCNO 1

F2 - Acquisition Parameters  
 Date\_ 20201125  
 Time 16.42  
 INSTRUM spect  
 PROBHD 5 mm PABBO BB/  
 PULPROG zgpg30  
 TD 65536  
 SOLVENT DMSO  
 NS 1500  
 DS 4  
 SWH 24038.461 Hz  
 FIDRES 0.366798 Hz  
 AQ 1.3631488 sec  
 RG 202.37  
 DW 20.800 usec  
 DE 6.50 usec  
 TE 298.0 K  
 D1 2.00000000 sec  
 D11 0.03000000 sec  
 TD0 1

==== CHANNEL f1 =====  
 SFO1 100.6379178 MHz  
 NUC1 13C  
 P1 10.00 usec  
 PLW1 45.00000000 W

==== CHANNEL f2 =====  
 SFO2 400.1916008 MHz  
 NUC2 1H  
 CPDPRG[2] waltz16

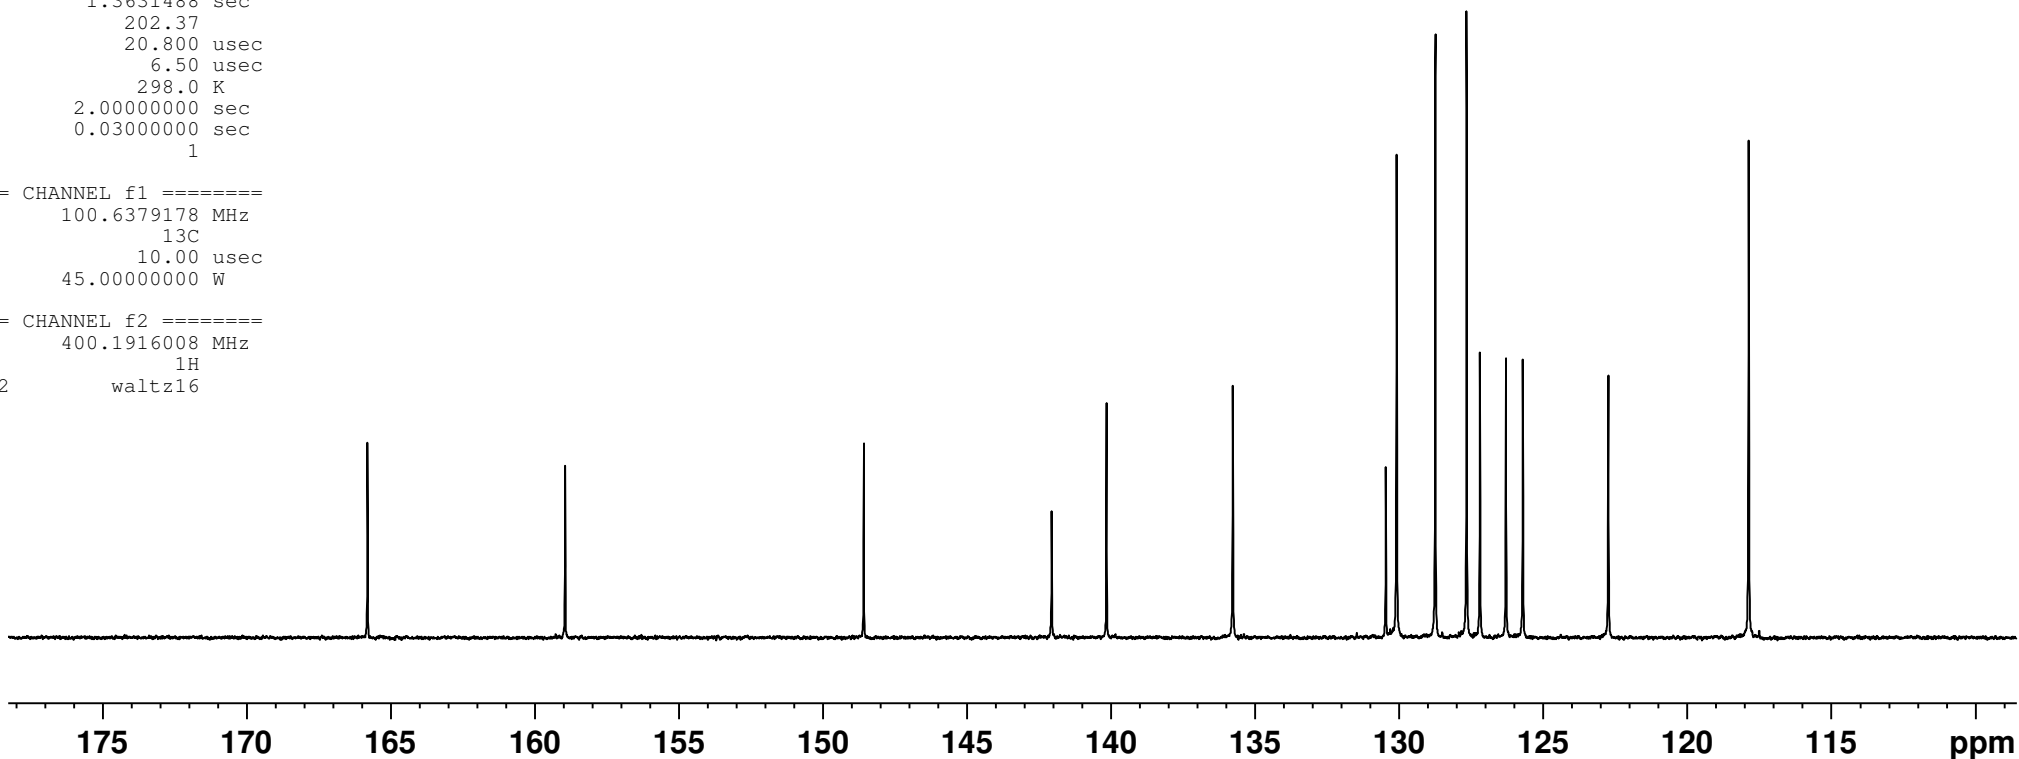



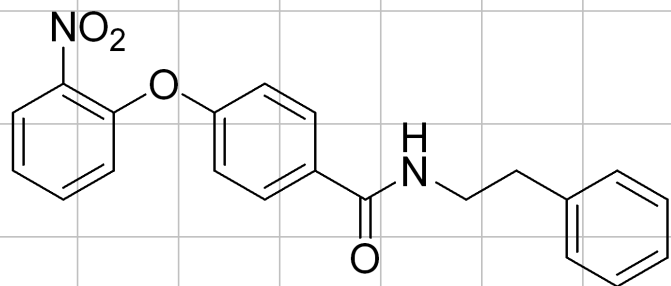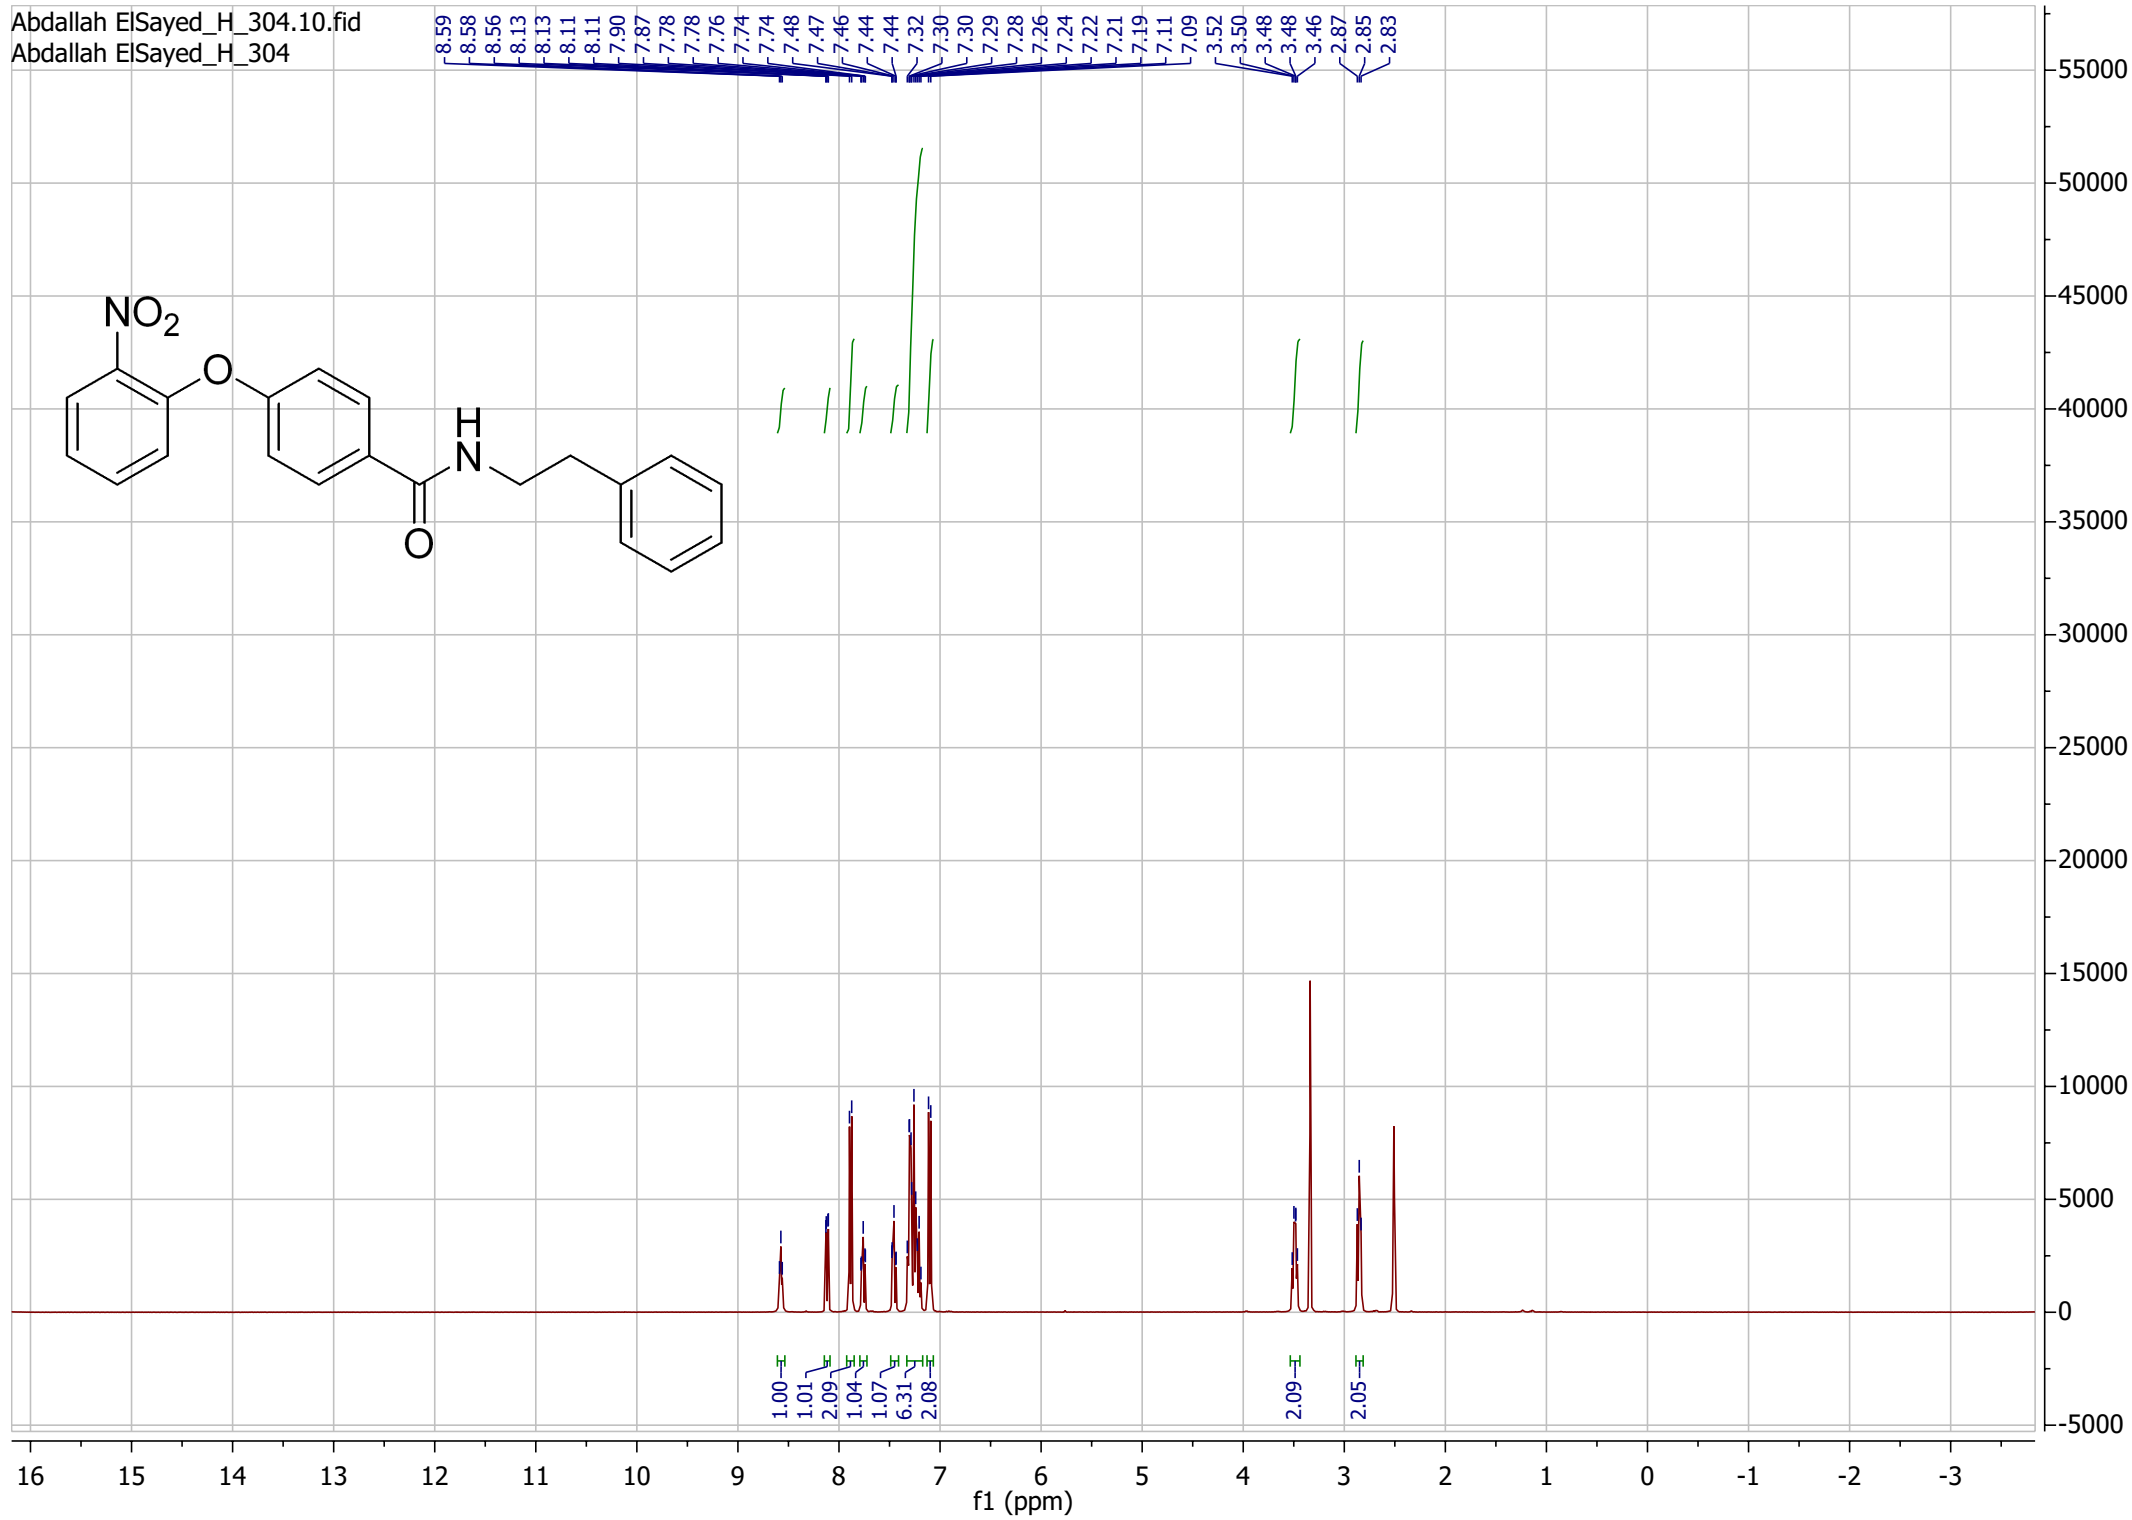

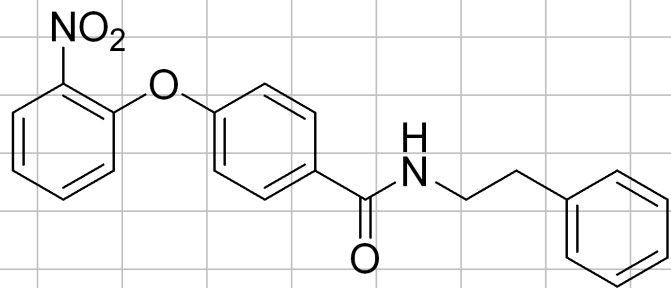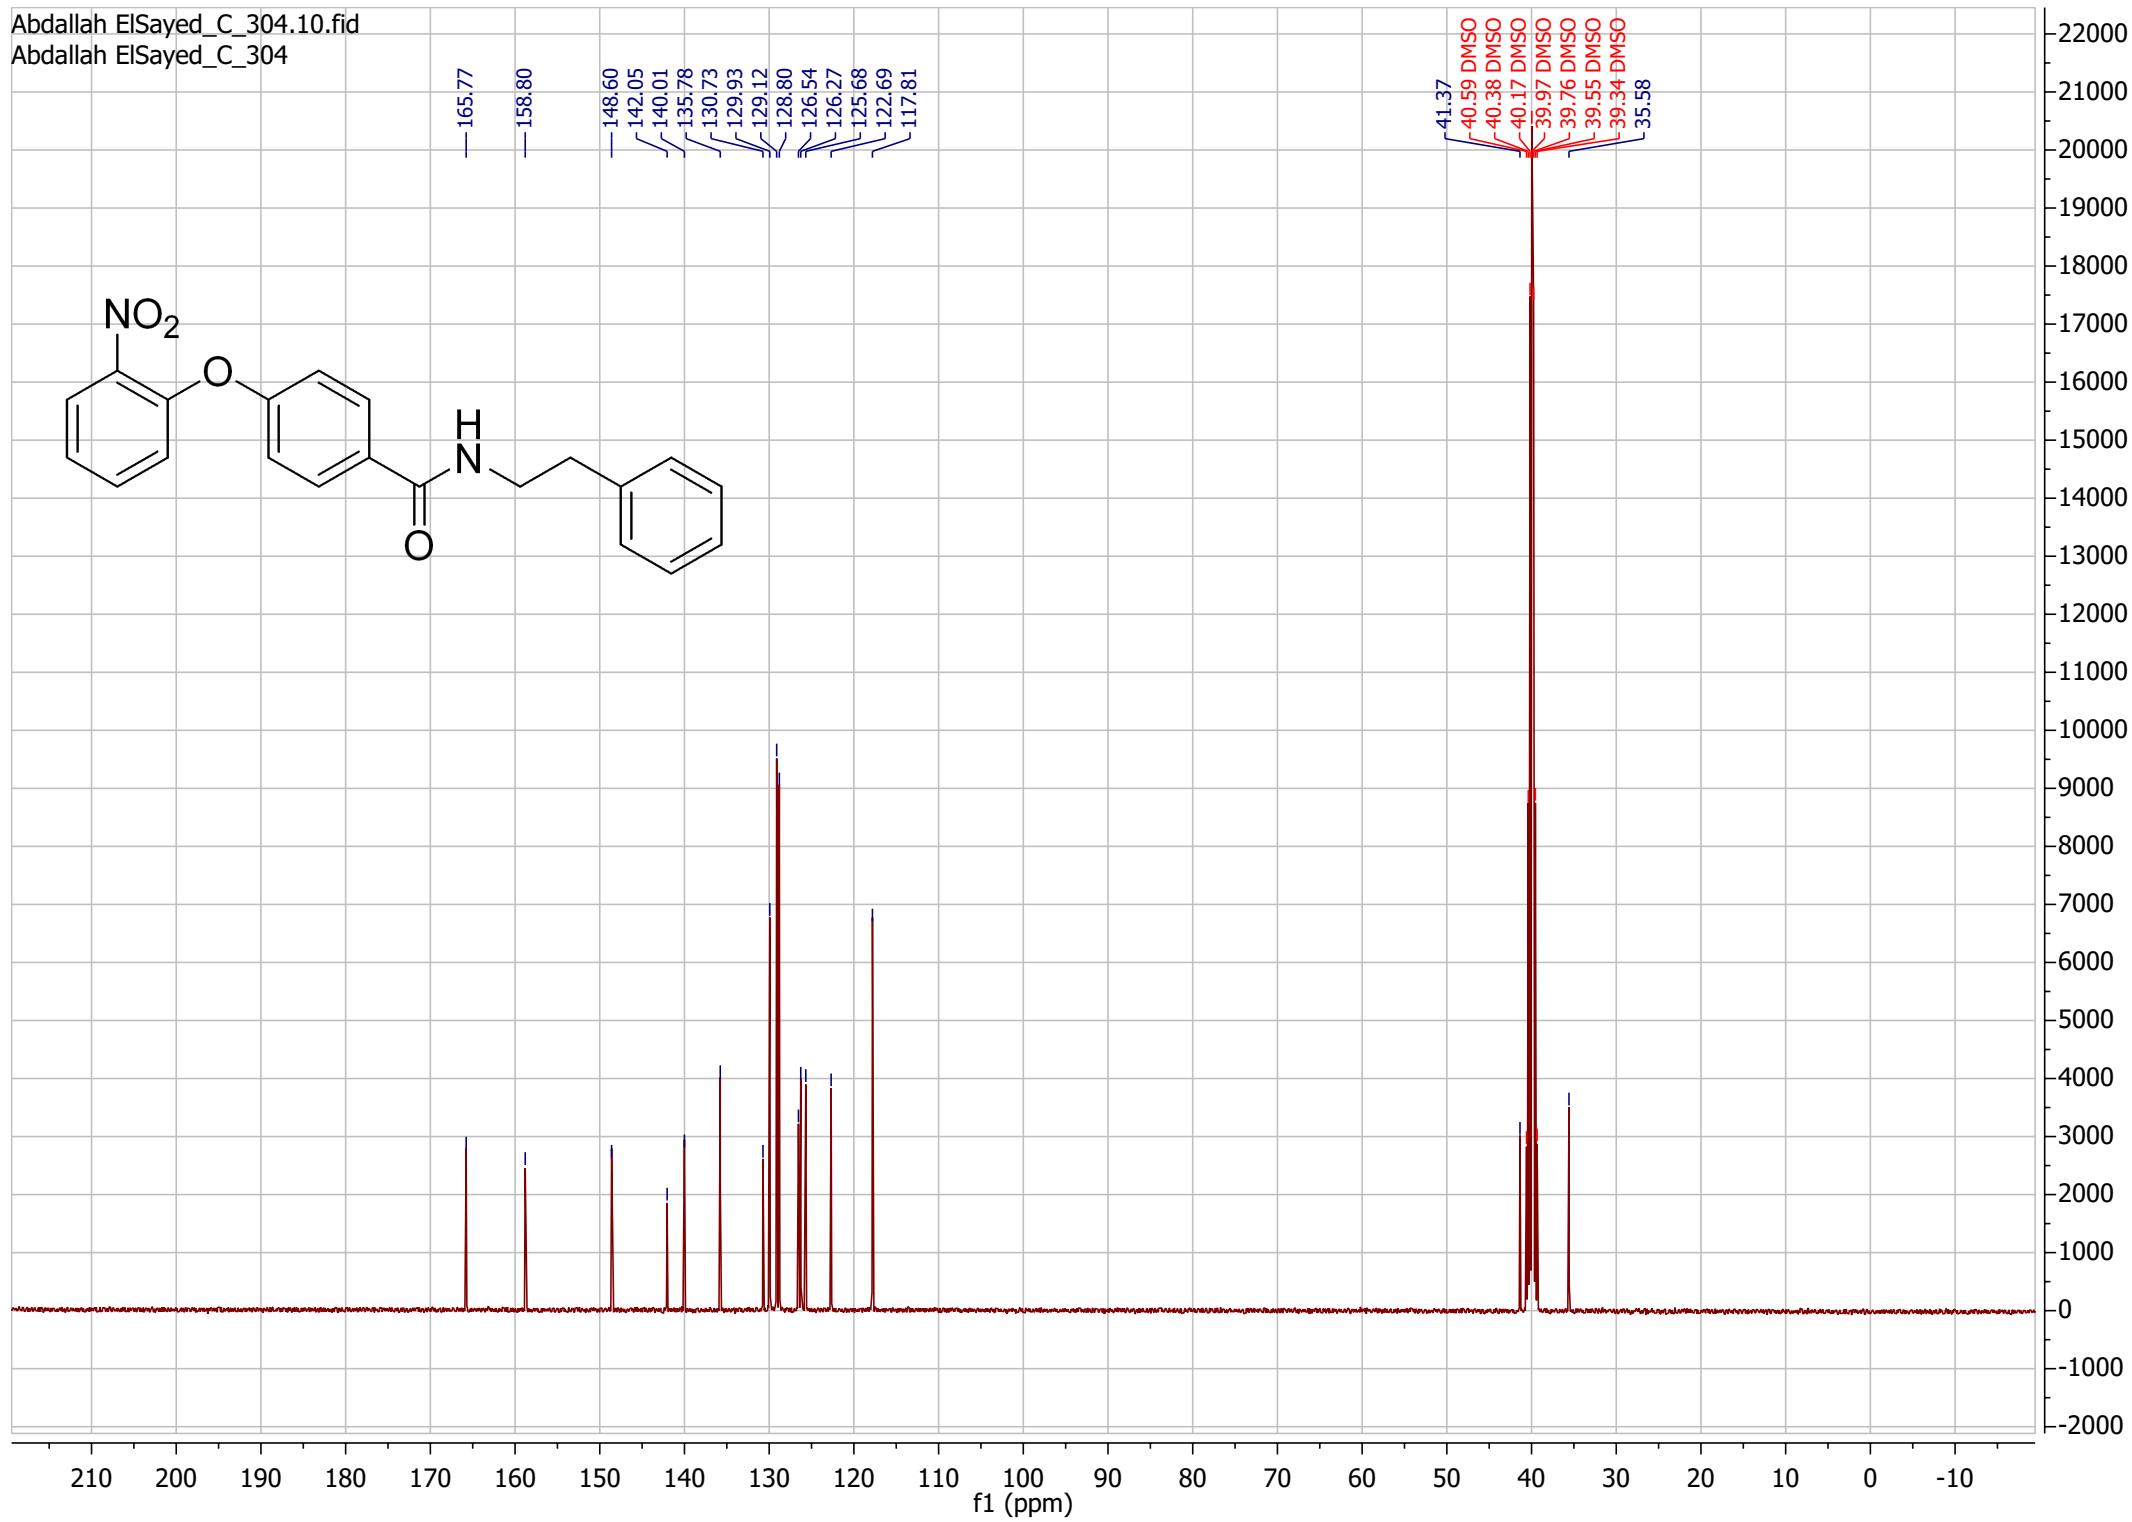

## Mutation at four sites

(Gln270 to Tyr270, Asp165 to Phe165, Pro249 to Glu249, and Tyr269 to Arg269)

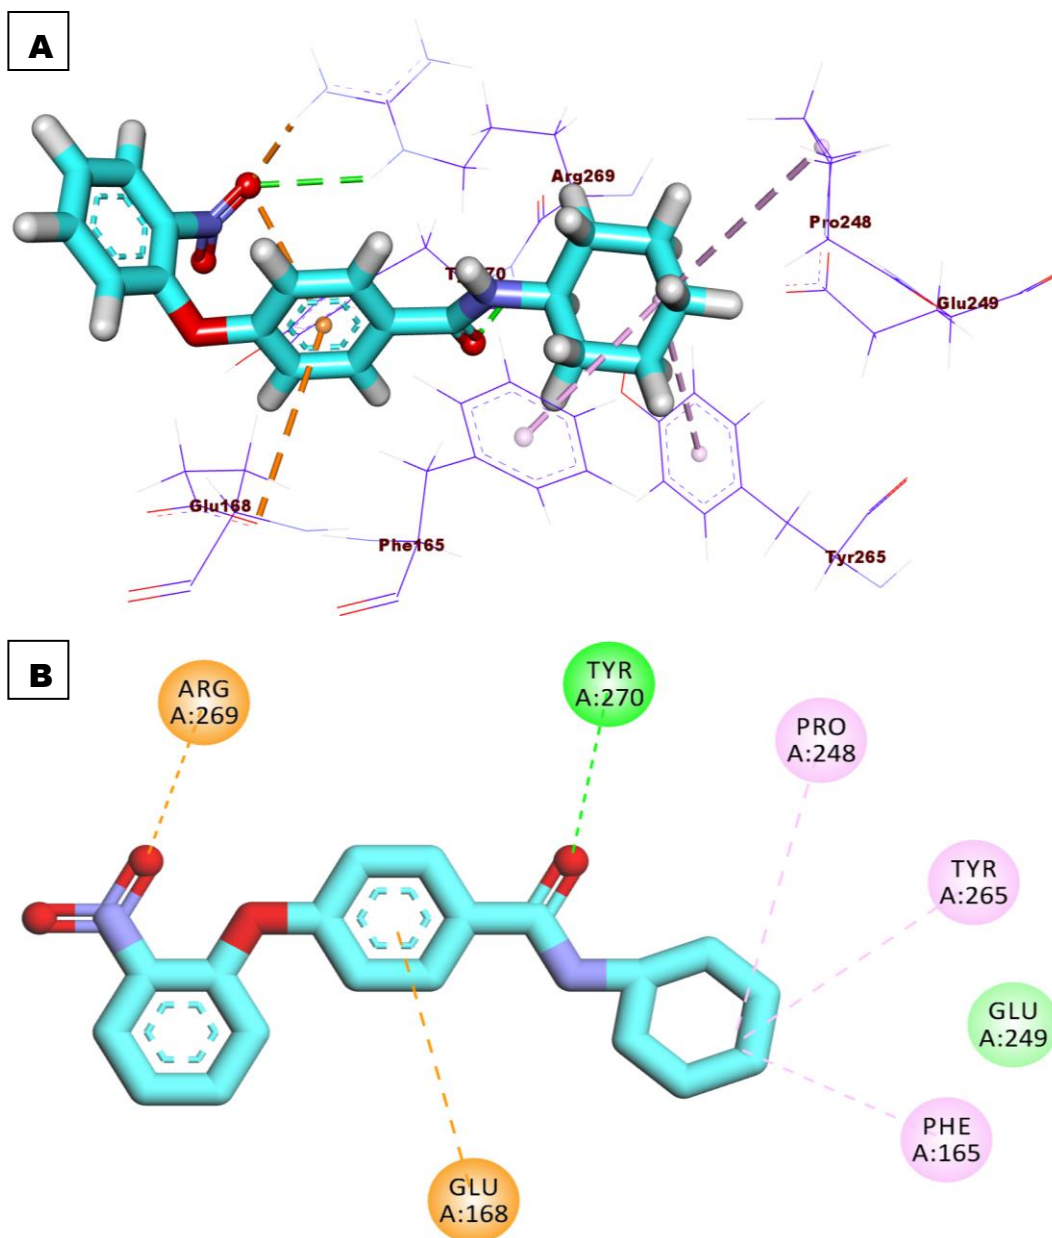

**SI 1:** A) 3D binding mode of compound **9<sub>a</sub>** into mutant PLpro active site. B) 2D binding mode of compound **9<sub>a</sub>** into mutant PLpro active site (hydrogen bonds = green dashed lines, electrostatic interactions = orange dashed lines, pi-pi interactions = deep pink dashed lines, and pi-alkyl interactions = light pink dashed lines).

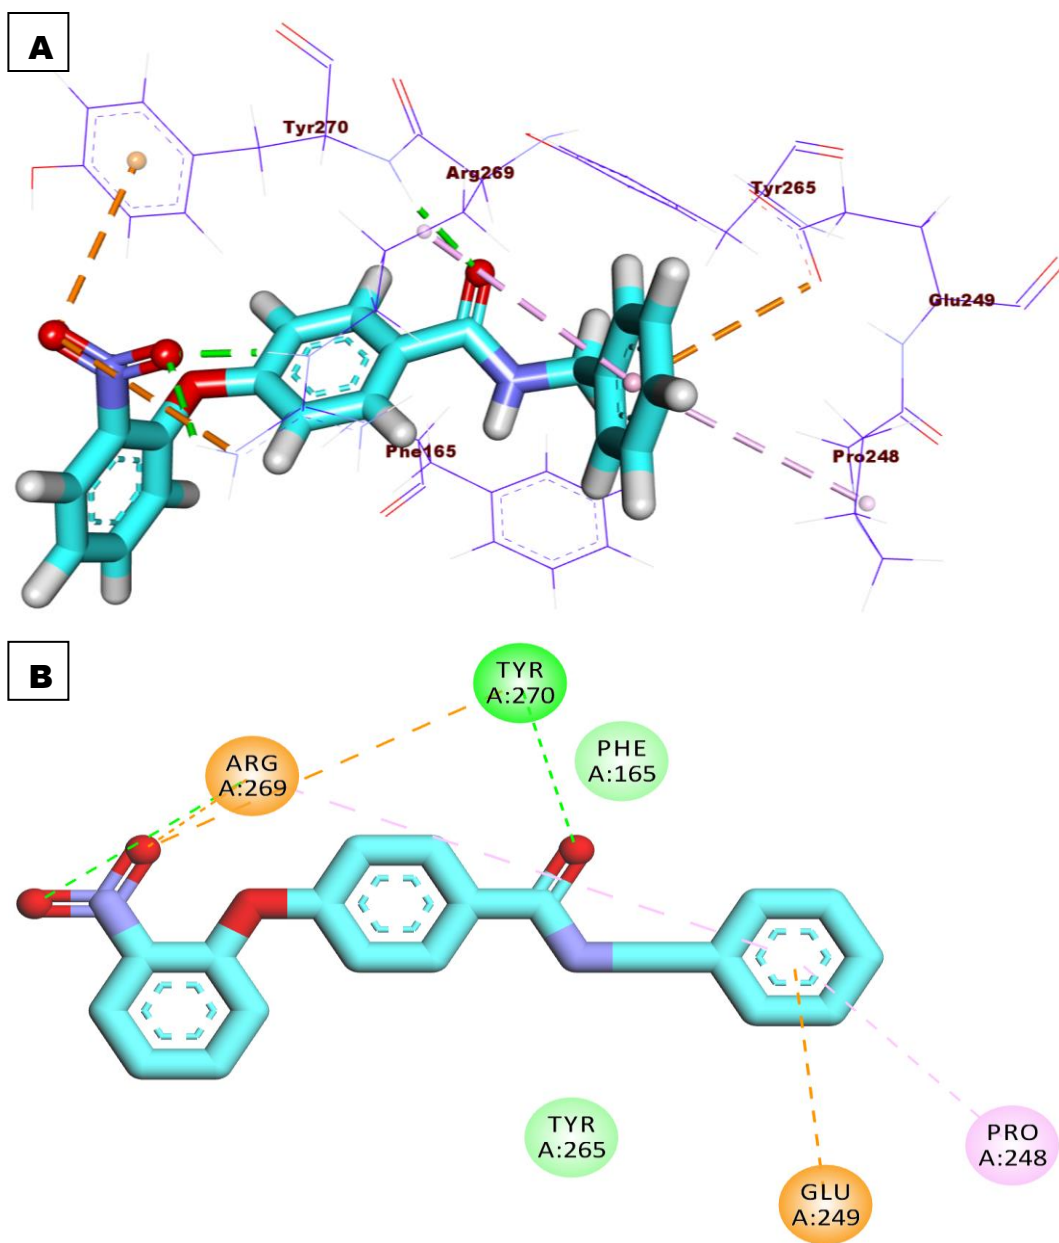

**SI 2:** A) 3D binding mode of compound **10<sub>a</sub>** into mutant PLpro active site. B) 2D binding mode of compound **10<sub>a</sub>** into mutant PLpro active site (hydrogen bonds = green dashed lines, electrostatic interactions = orange dashed lines, pi-pi interactions = deep pink dashed lines, and pi-alkyl interactions = light pink dashed lines).

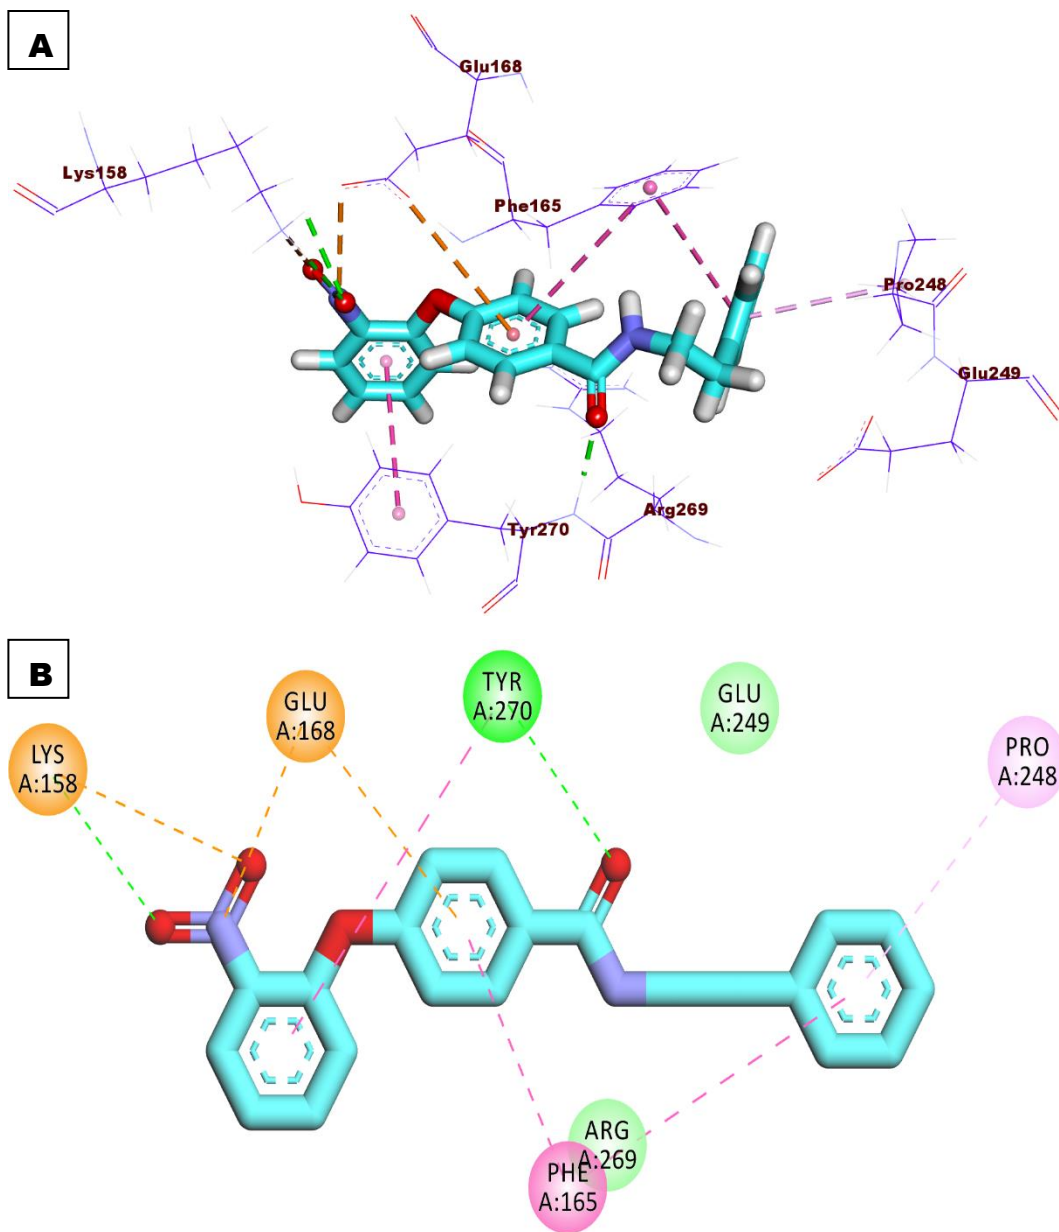

**SI 3:** A) 3D binding mode of compound **10b** into mutant PLpro active site. B) 2D binding mode of compound **10b** into mutant PLpro active site (hydrogen bonds = green dashed lines, electrostatic interactions = orange dashed lines, pi-pi interactions = deep pink dashed lines, and pi-alkyl interactions = light pink dashed lines).

## Mutation at two sites

(Gln270 to Tyr270 & Pro249 to Glu249)

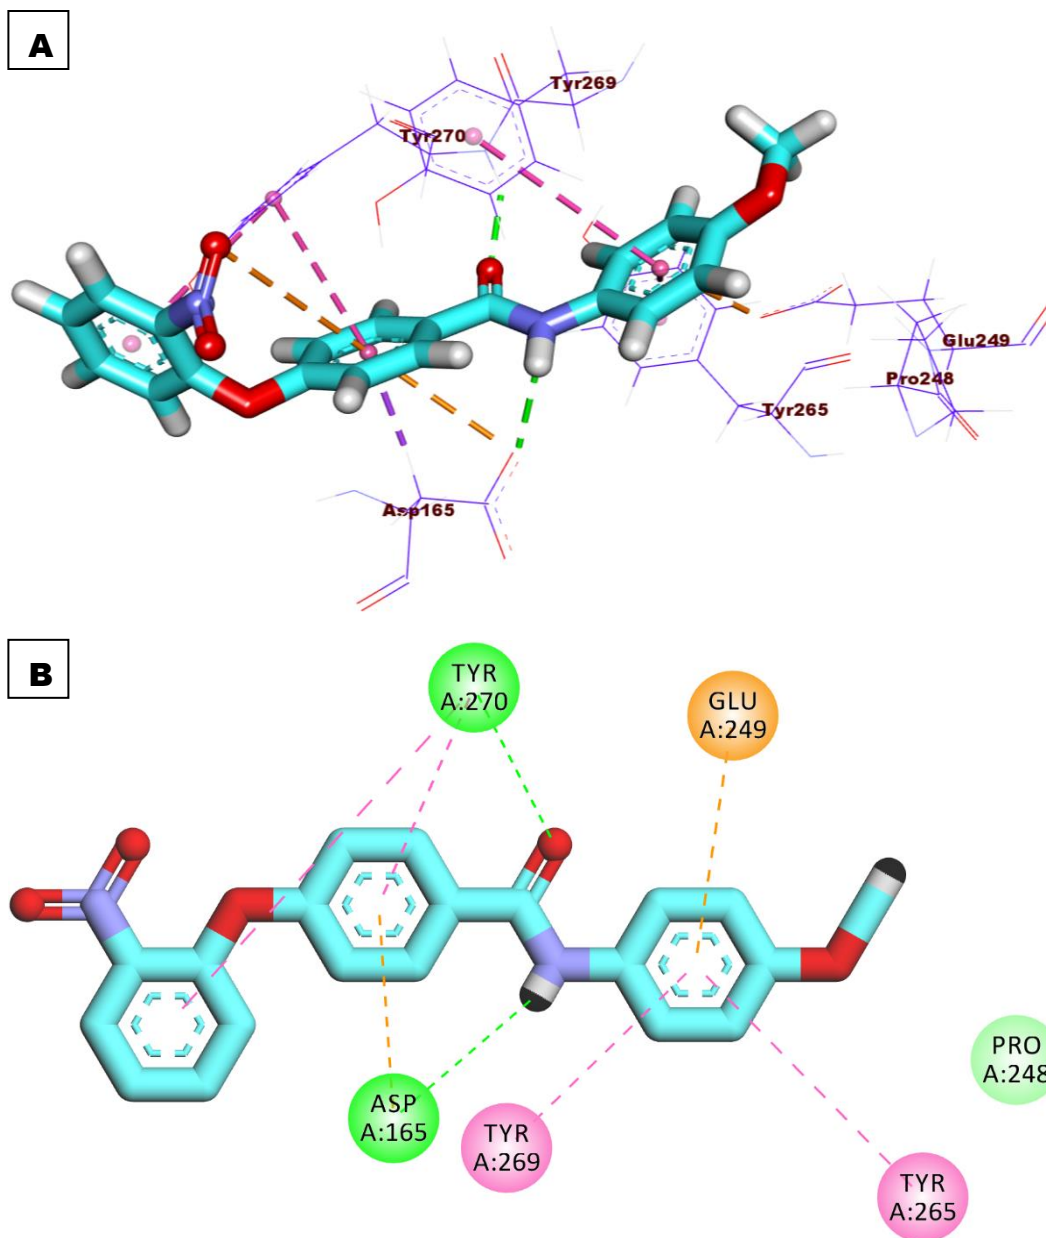

**SI 4:** A) 3D binding mode of compound **8b** into mutant PLpro active site. B) 2D binding mode of compound **8b** into mutant PLpro active site (hydrogen bonds = green dashed lines, electrostatic interactions = orange dashed lines, pi-pi interactions = deep pink dashed lines, and pi-alkyl interactions = light pink dashed lines).

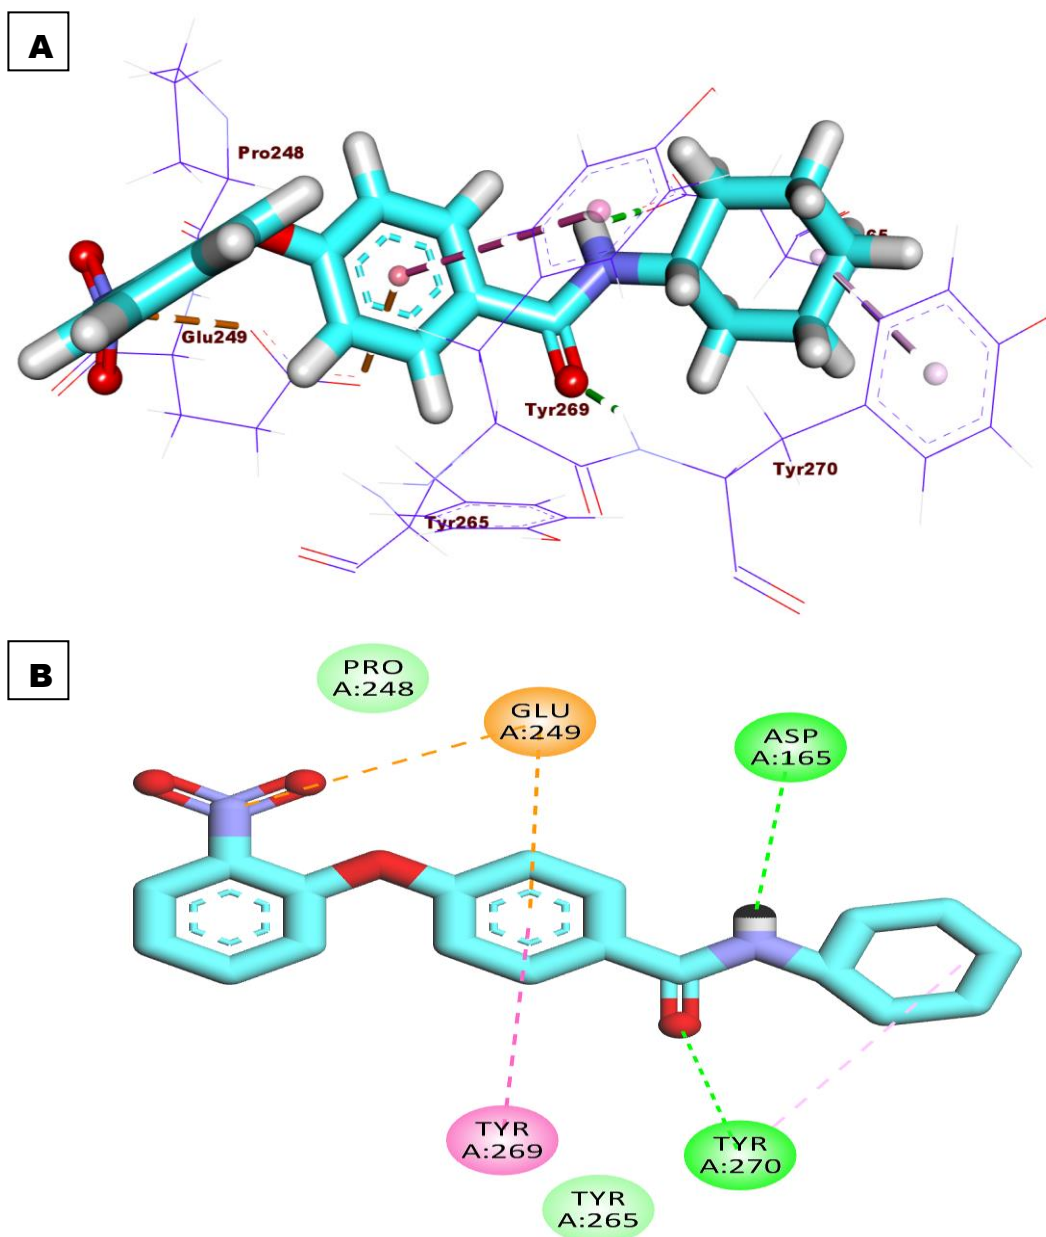

**SI 5:** A) 3D binding mode of compound **9<sub>a</sub>** into mutant PLpro active site. B) 2D binding mode of compound **9<sub>a</sub>** into mutant PLpro active site (hydrogen bonds = green dashed lines, electrostatic interactions = orange dashed lines, pi-pi interactions = deep pink dashed lines, and pi-alkyl interactions = light pink dashed lines).

## Docking against adenovirus

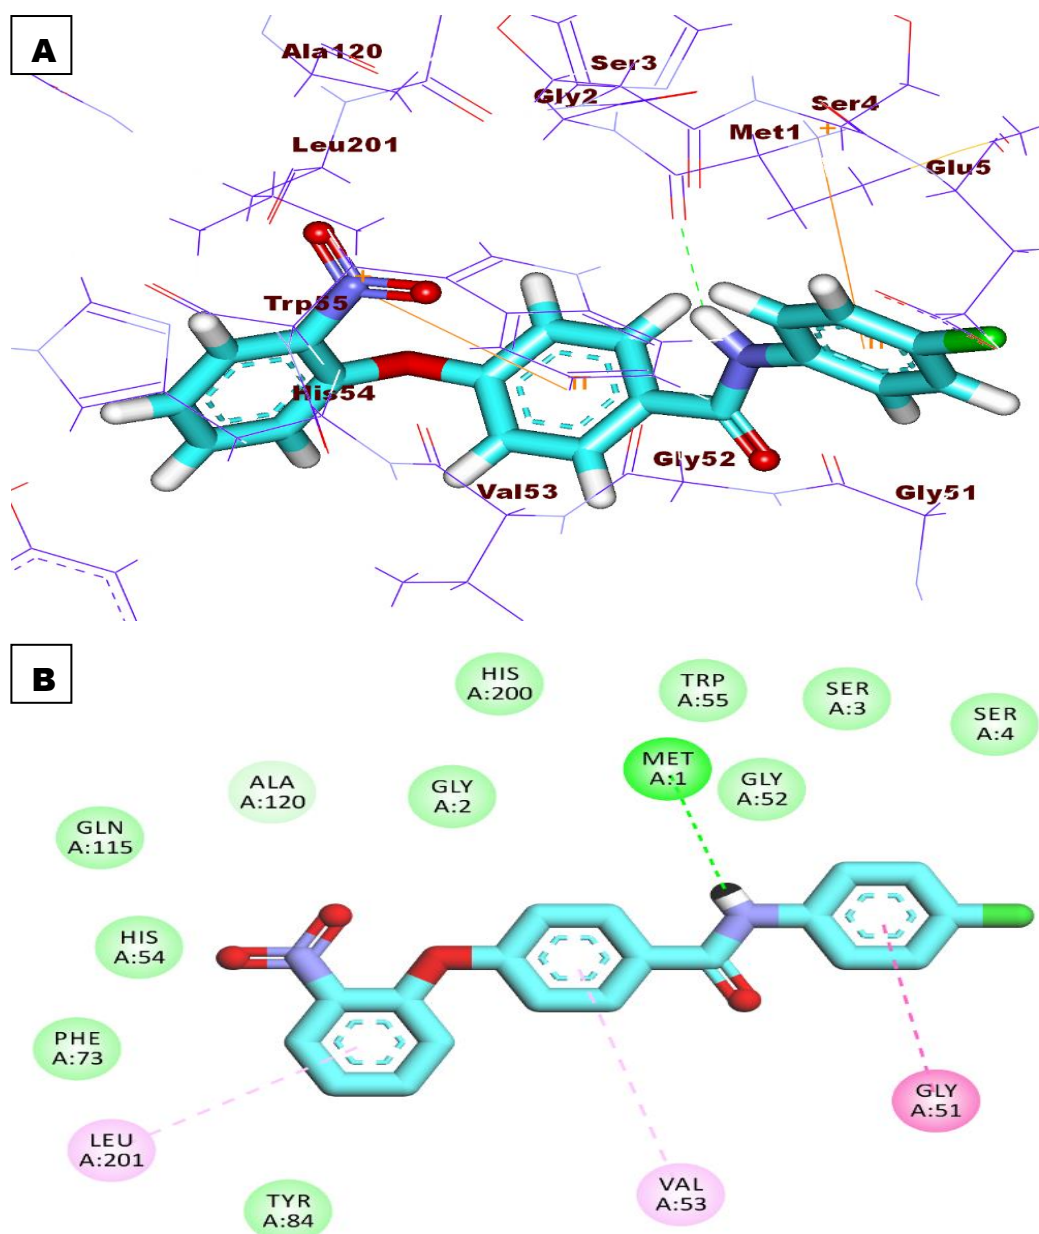

**SI 6:** A) 3D binding mode of compound **8c** into adenovirus active site. B) 2D binding mode of compound **8c** into adenovirus active site (hydrogen bonds = green dashed lines, electrostatic interactions = orange dashed lines, pi-pi interactions = deep pink dashed lines, and pi-alkyl interactions = light pink dashed lines).



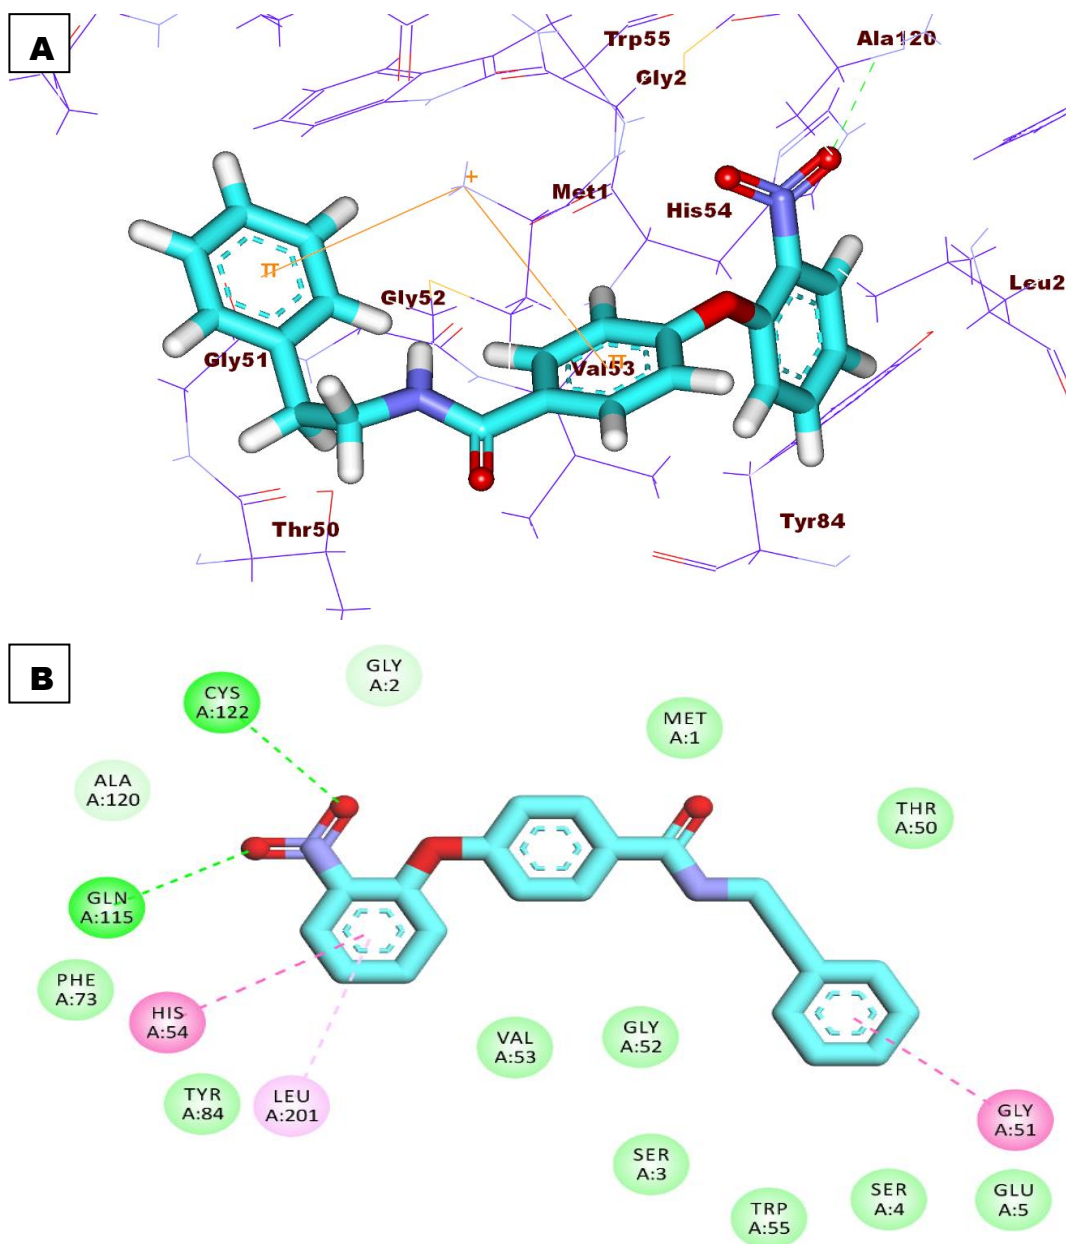

**SI 7:** A) 3D binding mode of compound **10b** into adenovirus active site. B) 2D binding mode of compound **10b** into adenovirus active site (hydrogen bonds = green dashed lines, electrostatic interactions = orange dashed lines, pi-pi interactions = deep pink dashed lines, and pi-alkyl interactions = light pink dashed lines).

## Docking against HSV-1

**A**

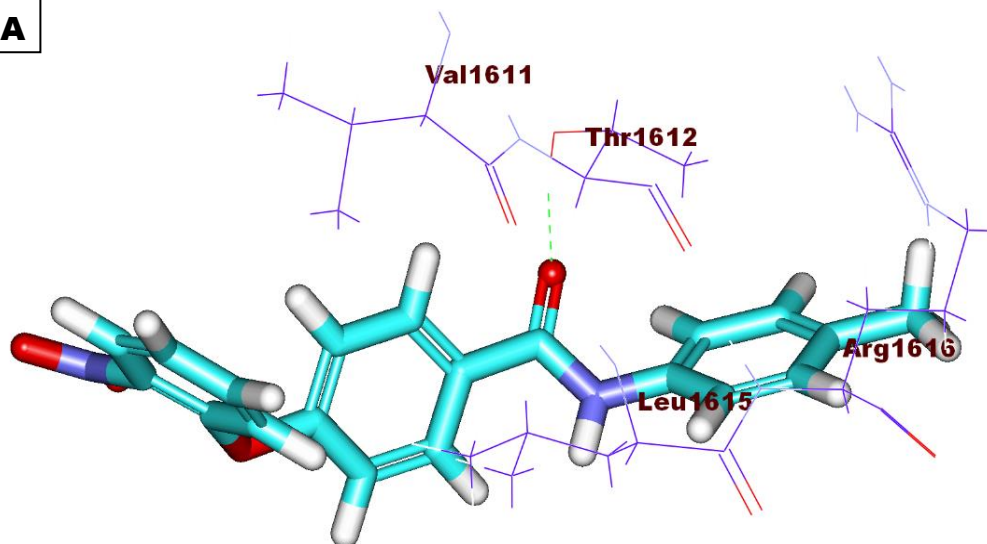

**B**

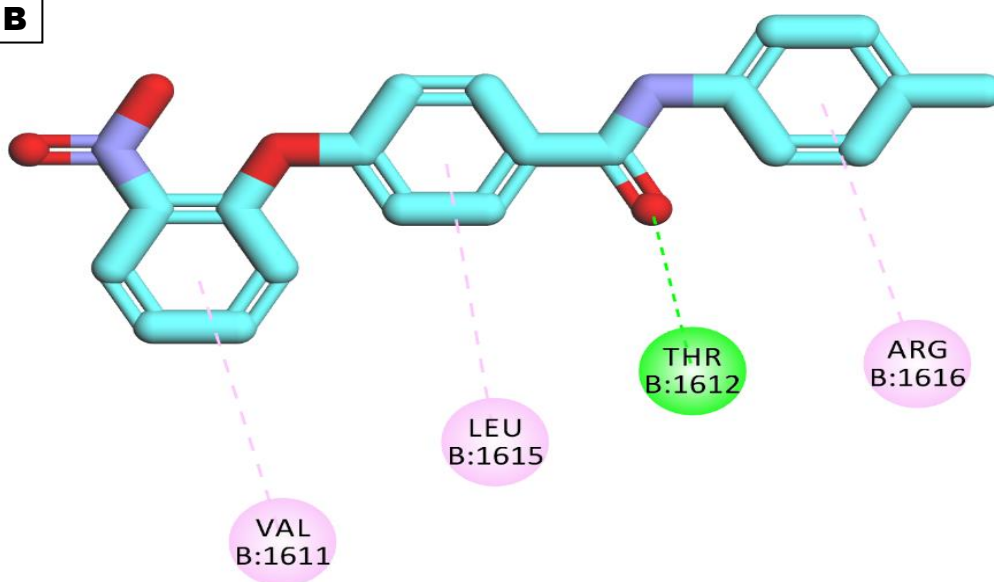

**SI 8:** A) 3D binding mode of compound **8a** into HSV-1 active site. B) 2D binding mode of compound **8a** into HSV-1 active site (hydrogen bonds = green dashed lines, electrostatic interactions = orange dashed lines, pi-pi interactions = deep pink dashed lines, and pi-alkyl interactions = light pink dashed lines).

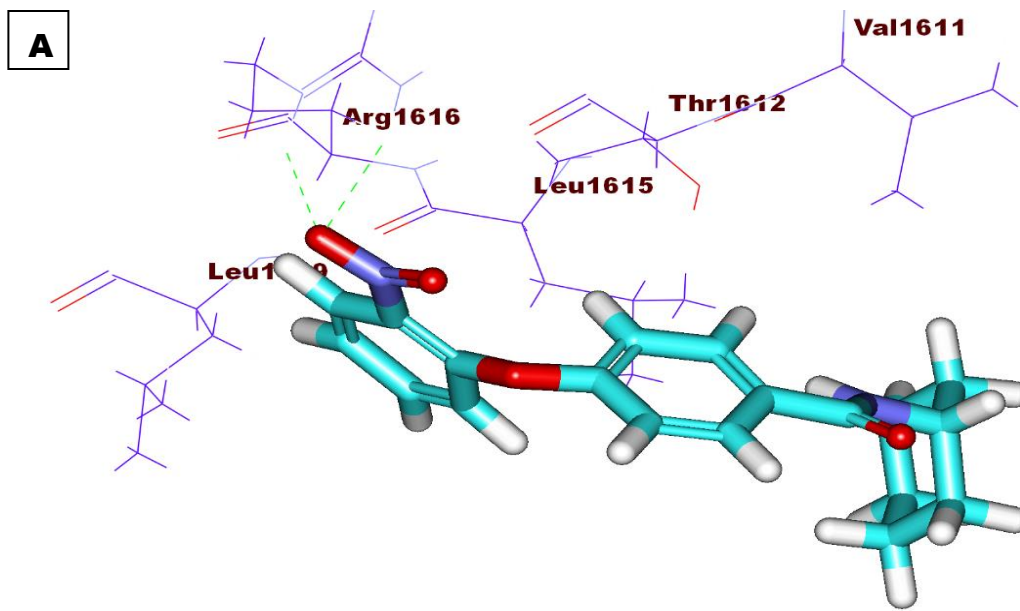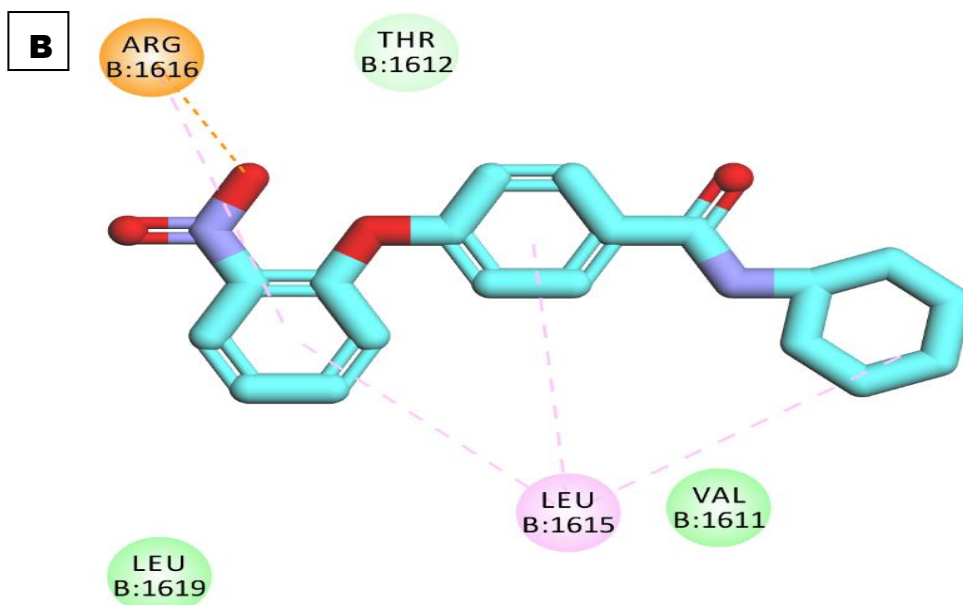

**SI 9:** A) 3D binding mode of compound **9a** into HSV-1 active site. B) 2D binding mode of compound **9a** into HSV-1 active site (hydrogen bonds = green dashed lines, electrostatic interactions = orange dashed lines, pi-pi interactions = deep pink dashed lines, and pi-alkyl interactions = light pink dashed lines).

## Docking against coxsackie virus

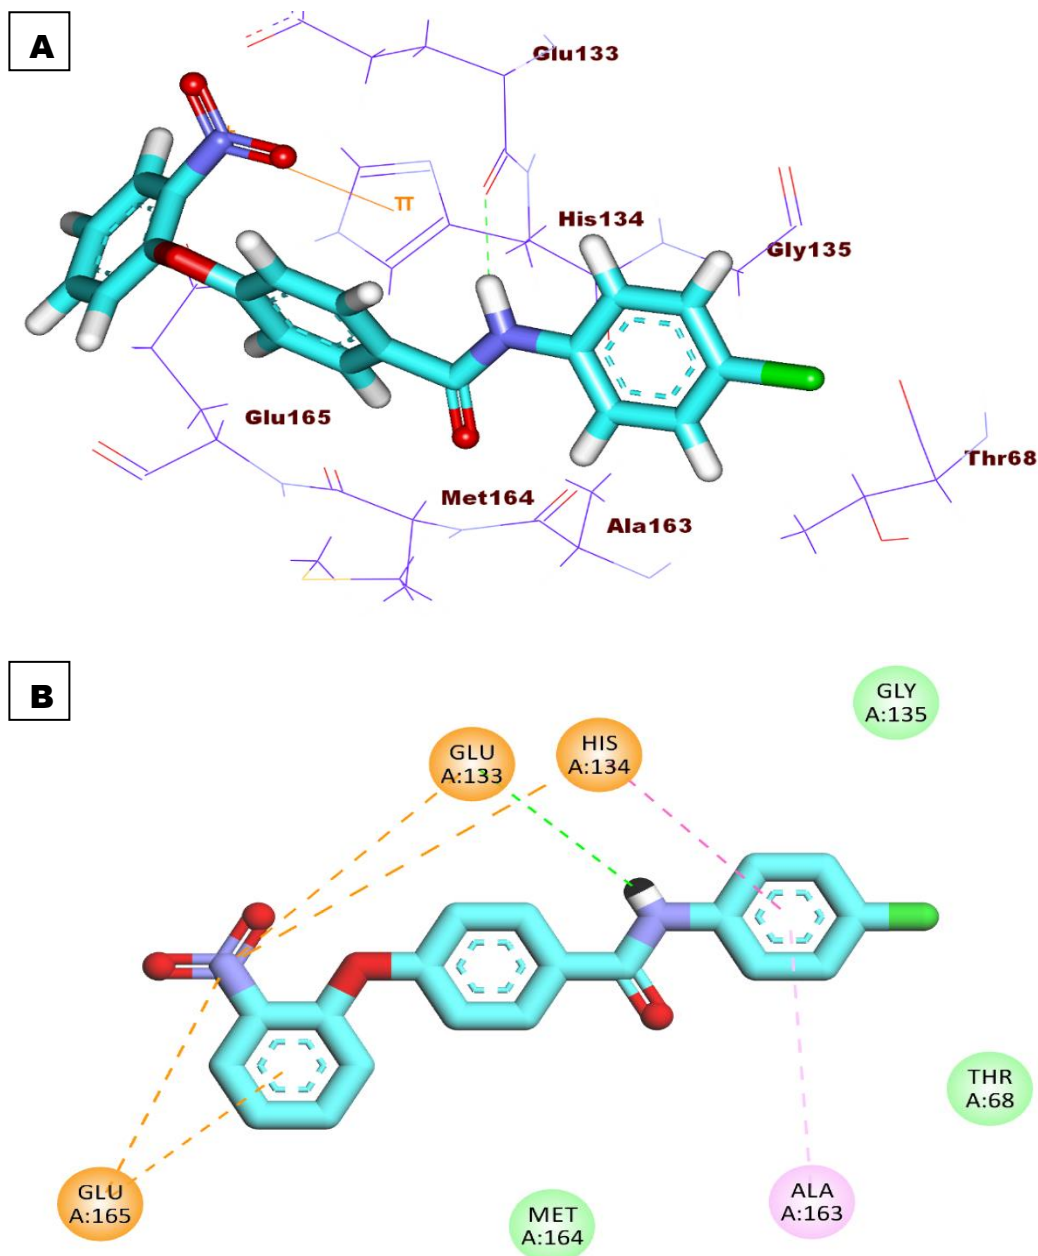

**SI 10:** A) 3D binding mode of compound **8c** into coxsackievirus active site. B) 2D binding mode of compound **8c** into coxsackievirus active site (hydrogen bonds = green dashed lines, electrostatic interactions = orange dashed lines, pi-pi interactions = deep pink dashed lines, and pi-alkyl interactions = light pink dashed lines).

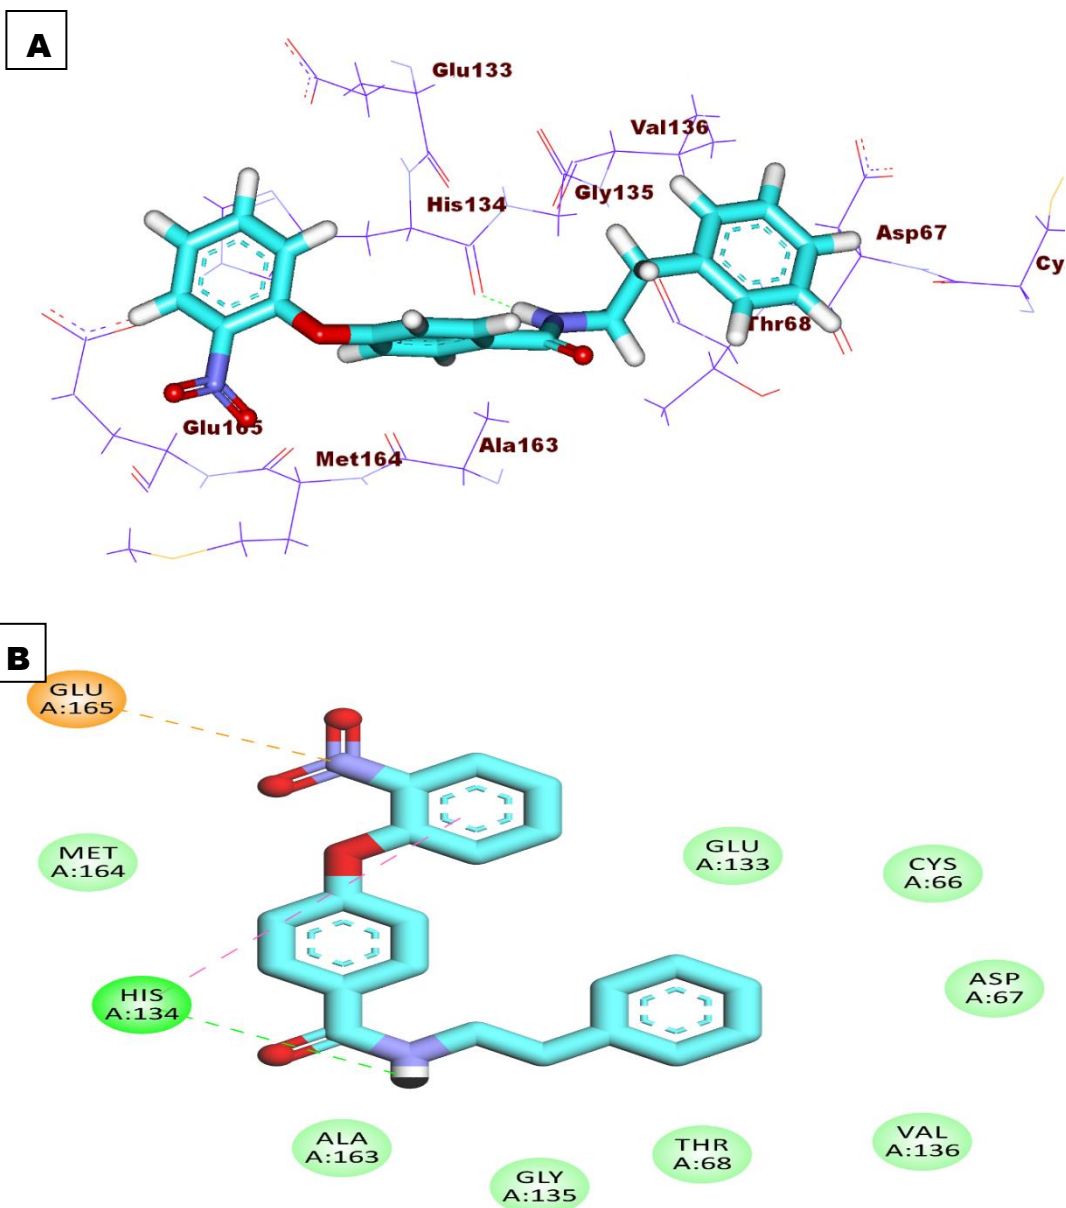

**SI 11:** A) 3D binding mode of compound **10a** into coxsacivirus active site. B) 2D binding mode of compound **10a** into coxsacivirus active site (hydrogen bonds = green dashed lines, electrostatic interactions = orange dashed lines, pi-pi interactions = deep pink dashed lines, and pi-alkyl interactions = light pink dashed lines).
